# Supplementary material for: Large-scale phenotyping of 1,000 fungal strains for the degradation of non-natural, industrial compounds
Source: PubMed Central journal article supplement (PMC8282864; doi:10.1038/s42003-021-02401-w), 2021-07-15
Supplement: 42003_2021_2401_MOESM2_ESM.pdf [file 42003_2021_2401_MOESM2_ESM.pdf]

## **Description of Additional Supplementary Files**

**File Name:** Supplementary Data 1

**Description:** Origin and authentication of the 1,031 selected strain.

**File Name:** Supplementary Data 2

**Description:** Raw data of the growth and functional phenotyping.

**File Name:** Supplementary Data 3

**Description:** Statistical analysis of the distribution of phenotypic scores at the family level.
