# Supplementary material for: Large-scale phenotyping of 1,000 fungal strains for the degradation of non-natural, industrial compounds
Source: Commun Biol. 2021 Jul 15;4:871. doi: 10.1038/s42003-021-02401-w (PMC8282864; doi:10.1038/s42003-021-02401-w)
Supplement: Supplementary file 3 — Supplementary Data 1 [file 42003_2021_2401_MOESM3_ESM.xlsx]

## Sheet: Feuil1
Origin and authentication of the 1,031 selected strains
				1 Culture Collection						WR: White-Rot SR: Soft-Rot BR: Brown-Rot SR(II): Soft-Rot type II
BRFM Number	Strain name	Taxonomic name	Family, Order, Class, Phylum	Other CC1 number	Deposit accession number	Deposited by	Specimen number	collected by	isolated by	Lifestyle	Substrate of isolation, Habitat	Geographic origin	Authenticated by	Sequence definition
2	Trametes hirsuta	Trametes hirsuta (Wulfen) Pilát	Polyporaceae, Polyporales, Agaricomycetes, Basidiomycota		IMB G54	GUO Lin				Wood-saprotroph WR		China	ITS sequencing	ITS-BRFM 2
3	Pycnoporus sanguineus	Pycnoporus sanguineus (L.) Murrill	Polyporaceae, Polyporales, Agaricomycetes, Basidiomycota		IMB G53	GUO Lin				Wood-saprotroph WR	Rotten wood of Pinus sp	Hainan, China	ITS sequencing	ITS-BRFM 3
5	Pycnoporus sanguineus	Pycnoporus sanguineus (L.) Murrill	Polyporaceae, Polyporales, Agaricomycetes, Basidiomycota		IMB H2008	GUO Lin				Wood-saprotroph WR	Rotten hardwood	Hainan, China	ITS sequencing	ITS-BRFM 5
6	Pycnoporus sanguineus	Pycnoporus sanguineus (L.) Murrill	Polyporaceae, Polyporales, Agaricomycetes, Basidiomycota		IMB H2180	GUO Lin				Wood-saprotroph WR	Rotten hardwood	Hainan, China	ITS sequencing	ITS-BRFM 6
7	Pycnoporus sanguineus	Pycnoporus sanguineus (L.) Murrill	Polyporaceae, Polyporales, Agaricomycetes, Basidiomycota		IMB G05	GUO Lin				Wood-saprotroph WR	Wood	Guangdong, China	ITS sequencing	ITS-BRFM 7
10	Trametes hirsuta	Trametes hirsuta (Wulfen) Pilát	Polyporaceae, Polyporales, Agaricomycetes, Basidiomycota		IMB G56	GUO Lin				Wood-saprotroph WR		China	ITS sequencing	ITS-BRFM 10
11	Pycnoporus sanguineus	Pycnoporus sanguineus (L.) Murrill	Polyporaceae, Polyporales, Agaricomycetes, Basidiomycota		IMB G66	GUO Lin				Wood-saprotroph WR	Rotten hardwood	Hainan, China	ITS sequencing	ITS-BRFM 11
12	Bjerkandera adusta	Bjerkandera adusta (Willd.) P. Karst.	Meruliaceae, Polyporales, Agaricomycetes, Basidiomycota	CBS 595.78						Wood-saprotroph WR	angiosperm, Schovenhorst, near Putten Netherlands	Putten, Netherlands
13	Trametes suaveolens	Trametes suaveolens (L.) Fr.	Polyporaceae, Polyporales, Agaricomycetes, Basidiomycota	CBS 446.61						Wood-saprotroph WR		Austria	ITS sequencing	ITS-BRFM 13
14	Gloeophyllum trabeum	Gloeophyllum trabeum (Pers.) Murrill	Gloeophyllaceae, Gloeophyllales, Agaricomycetes, Basidiomycota	ATCC 32084						Wood-saprotroph BR		Canada	ITS sequencing	ITS-BRFM 14
15	Neolentinus lepideus	Neolentinus lepideus (Fr.) Redhead & Ginns	Gloeophyllaceae, Gloeophyllales, Agaricomycetes, Basidiomycota	ATCC 36557						Wood-saprotroph BR		British Columbia, Canada	ITS sequencing	ITS-BRFM 15
16	Dichomitus squalens	Dichomitus squalens (P. Karst.) D.A. Reid	Polyporaceae, Polyporales, Agaricomycetes, Basidiomycota	ATCC 52892						Wood-saprotroph WR		Canada	ITS sequencing	ITS-BRFM 16
17	Pleurotus ostreatus	Pleurotus ostreatus (Jacq.) P. Kumm.	Pleurotaceae, Agaricales, Agaricomycetes, Basidiomycota	MUCL 28511						Wood-saprotroph WR	Cultivated mushrooms	Belgium	ITS sequencing	ITS-BRFM 17
19	Lentinus lepideus	Lentinus lepideus (Fr.) Fr.	Gloeophyllaceae, Gloeophyllales, Agaricomycetes, Basidiomycota	ATCC 11453						Wood-saprotroph BR			ITS sequencing	ITS-BRFM 19
20	Neolentinus suffrutescens	Lentinus lepideus (Fr.) Fr.	Gloeophyllaceae, Gloeophyllales, Agaricomycetes, Basidiomycota	CBS 450.79						Wood-saprotroph BR		France	ITS sequencing	ITS-BRFM 20
21	Lentinula edodes	Lentinula edodes (Berk.) Pegler	Omphalotaceae, Agaricales, Agaricomycetes, Basidiomycota	ATCC 36558						Wood-saprotroph WR			ITS sequencing	ITS-BRFM 21
22	Pycnoporus coccineus	Pycnoporus coccineus (Fr.) Bondartsev & Singer	Polyporaceae, Polyporales, Agaricomycetes, Basidiomycota		IMB W006	GUO Lin				Wood-saprotroph WR	Rotten wood of broad-leaves tree	Guangxi, China	ITS sequencing	ITS-BRFM 22
23	Pycnoporus sanguineus	Pycnoporus sanguineus (L.) Murrill	Polyporaceae, Polyporales, Agaricomycetes, Basidiomycota		IMB W3008	GUO Lin				Wood-saprotroph WR	Rotten wood of broad-leaves tree	Guangxi, China	ITS sequencing	ITS-BRFM 23
24	Trametes versicolor	Trametes versicolor (L.) Lloyd	Polyporaceae, Polyporales, Agaricomycetes, Basidiomycota		IMB G30	GUO Lin				Wood-saprotroph WR		China	ITS sequencing	ITS-BRFM 24
25	Trametes sp.	Trametes Fr.	Polyporaceae, Polyporales, Agaricomycetes, Basidiomycota		IMB 98415	GUO Lin				Wood-saprotroph WR		Beijin, China	ITS sequencing	ITS-BRFM 25
26	Trametes versicolor	Trametes versicolor (L.) Lloyd	Polyporaceae, Polyporales, Agaricomycetes, Basidiomycota		IMB G014	GUO Lin				Wood-saprotroph WR	wood	Guangdong, China	ITS sequencing	ITS-BRFM 26
27	Microporus affinis	Microporus affinis (Blume & T. Nees) Kuntze	Polyporaceae, Polyporales, Agaricomycetes, Basidiomycota		IMB G07	GUO Lin				Wood-saprotroph		Guangdong, China	ITS sequencing	ITS-BRFM 27
28	Trametes versicolor	Trametes versicolor (L.) Lloyd	Polyporaceae, Polyporales, Agaricomycetes, Basidiomycota		IMB G010	GUO Lin				Wood-saprotroph WR	wood	Guangdong, China	ITS sequencing	ITS-BRFM 28
29	Spongipellis litschaueri	Spongipellis litschaueri Lohwag	Polyporaceae, Polyporales, Agaricomycetes, Basidiomycota		IMB 98346	GUO Lin				Plant-pathogen WR		Beijin, China	ITS sequencing	ITS-BRFM 29
31	Trametes hirsuta	Trametes hirsuta (Wulfen) Pilát	Polyporaceae, Polyporales, Agaricomycetes, Basidiomycota		IMB 98419	GUO Lin				Wood-saprotroph WR	wood	Beijin, China	ITS sequencing	ITS-BRFM 31
33	Fomitopsis pinicola	Fomitopsis pinicola (Sw.) P. Karst.	Fomitopsidaceae, Polyporales, Agaricomycetes, Basidiomycota		IMB 98558	GUO Lin				Wood-saprotroph BR	wood	Guangdong, China	ITS sequencing	ITS-BRFM 33
34	Cyathus sp.	Cyathus Haller	Agaricaceae, Agaricales, Agaricomycetes, Basidiomycota		IMB G41	GUO Lin				Wood-saprotroph WR	wood	Yunnan, China	ITS sequencing	ITS-BRFM 34
38	Pleurotus floridanus	Pleurotus floridanus Singer	Pleurotaceae, Agaricales, Agaricomycetes, Basidiomycota	MUCL 28155						Wood-saprotroph WR		Spain	ITS sequencing	ITS-BRFM 38
39	Trametes versicolor	Trametes versicolor (L.) Lloyd	Polyporaceae, Polyporales, Agaricomycetes, Basidiomycota	CBS 296.33						Wood-saprotroph WR			ITS sequencing	ITS-BRFM 39
40	Gloeophyllum trabeum	Gloeophyllum trabeum (Pers.) Murrill	Gloeophyllaceae, Gloeophyllales, Agaricomycetes, Basidiomycota	ATCC 11539						Wood-saprotroph BR	wood, sporophore on western red cedar pole		ITS sequencing	ITS-BRFM 40
41	Phanerochaete chrysosporium	Phanerochaete chrysosporium Burds.	Phanerochaetaceae, Polyporales, Agaricomycetes, Basidiomycota	I-1512	I-1512	SIGOILLOT Jean-Claude				Wood-saprotroph WR			ITS sequencing	ITS-BRFM 41
43	Perenniporia subacida	Perenniporia subacida (Peck) Donk	Polyporaceae, Polyporales, Agaricomycetes, Basidiomycota	CBS 463.50						Wood-saprotroph WR	wood, decaying Tsuga heterophylla	Pennsylvania, USA	ITS sequencing	ITS-BRFM 43
46	Pycnoporus coccineus	Pycnoporus coccineus (Fr.) Bondartsev & Singer	Polyporaceae, Polyporales, Agaricomycetes, Basidiomycota	CBS 356.63						Wood-saprotroph WR	wood, Asakawa, near Tokyo, Experimental Forest Japan	Japan	ITS sequencing	ITS-BRFM 46
47	Pycnoporus sanguineus	Pycnoporus sanguineus (L.) Murrill	Polyporaceae, Polyporales, Agaricomycetes, Basidiomycota	CBS 357.63						Wood-saprotroph WR	wood	Georgia, USA	ITS sequencing	ITS-BRFM 47
48	Pycnoporus sanguineus	Pycnoporus sanguineus (L.) Murrill	Polyporaceae, Polyporales, Agaricomycetes, Basidiomycota	CBS 358.63						Wood-saprotroph WR	wood, Dehra Dun India	India	ITS sequencing	ITS-BRFM 48
49	Pycnoporus sanguineus	Pycnoporus sanguineus (L.) Murrill	Polyporaceae, Polyporales, Agaricomycetes, Basidiomycota	CBS 614.73						Wood-saprotroph WR	wood, Hikkaduwa Sri Lanka	Sri Lanka	ITS sequencing	ITS-BRFM 49
52	Ceriporiopsis subvermispora	Ceriporiopsis subvermispora (Pilát) Gilb. & Ryvarden	Meruliaceae, Polyporales, Agaricomycetes, Basidiomycota	CBS 347.63						Wood-saprotroph WR	wood, Roosevelt National Forest Colorado	Colorado, USA	ITS sequencing	ITS-BRFM 52
53	Microporus affinis	Microporus affinis (Blume & T. Nees) Kuntze	Polyporaceae, Polyporales, Agaricomycetes, Basidiomycota		IMB 98531	GUO Lin				Wood-saprotroph	wood	Guangdong, China	ITS sequencing	ITS-BRFM 53
56	Pycnoporus sanguineus	Pycnoporus sanguineus (L.) Murrill	Polyporaceae, Polyporales, Agaricomycetes, Basidiomycota		IMB G117	GUO Lin				Wood-saprotroph WR		China	ITS sequencing	ITS-BRFM 56
60	Pycnoporus cinnabarinus	Pycnoporus cinnabarinus (Jacq.) P. Karst.	Polyporaceae, Polyporales, Agaricomycetes, Basidiomycota	MUCL 38480, CBS 393.61						Wood-saprotroph WR		Austria	ITS sequencing	ITS-BRFM 60
63	Pycnoporus cinnabarinus	Pycnoporus cinnabarinus (Jacq.) P. Karst.	Polyporaceae, Polyporales, Agaricomycetes, Basidiomycota	MUCL 38478, CBS 374.34						Wood-saprotroph WR		Belgium	ITS sequencing	ITS-BRFM 63
65	Pycnoporus coccineus	Pycnoporus coccineus (Fr.) Bondartsev & Singer	Polyporaceae, Polyporales, Agaricomycetes, Basidiomycota	CBS 355.63						Wood-saprotroph WR	wood, Bougainville, Aropa Airstrip Solomon Islands	Solomon Islands	ITS sequencing	ITS-BRFM 65
66	Pycnoporus coccineus	Pycnoporus coccineus (Fr.) Bondartsev & Singer	Polyporaceae, Polyporales, Agaricomycetes, Basidiomycota		IMB W006-2	GUO Lin				Wood-saprotroph WR		Guangxi, China	ITS sequencing	ITS-BRFM 66
67	Piptoporus betulinus	Piptoporus betulinus (Bull.) P. Karst.	Fomitopsidaceae, Polyporales, Agaricomycetes, Basidiomycota	CBS 378.51						Wood-saprotroph BR		Austria	ITS sequencing	ITS-BRFM 67
68	Bjerkandera adusta	Bjerkandera adusta (Willd.) P. Karst.	Meruliaceae, Polyporales, Agaricomycetes, Basidiomycota	CBS 230.93						Wood-saprotroph WR	wood	Germany	ITS sequencing	ITS-BRFM 68
69	Trametes versicolor	Trametes versicolor (L.) Lloyd	Polyporaceae, Polyporales, Agaricomycetes, Basidiomycota	ATCC 32745						Wood-saprotroph WR	wood	France	ITS sequencing	ITS-BRFM 69
70	Trametes versicolor	Trametes versicolor (L.) Lloyd	Polyporaceae, Polyporales, Agaricomycetes, Basidiomycota	ATCC 12679						Wood-saprotroph WR		Vermont, USA	ITS sequencing	ITS-BRFM 70
71	Trametes versicolor	Trametes versicolor (L.) Lloyd	Polyporaceae, Polyporales, Agaricomycetes, Basidiomycota	ATCC 34578, MUCL 1011, CBS 120.29						Wood-saprotroph WR	wood	Canada	ITS sequencing	ITS-BRFM 71
74	Trametes versicolor	Trametes versicolor (L.) Lloyd	Polyporaceae, Polyporales, Agaricomycetes, Basidiomycota	MNHN		DUPONT Joëlle				Wood-saprotroph WR	wood	Uruguay	ITS sequencing	ITS-BRFM 74
76	Trametes versicolor	Trametes versicolor (L.) Lloyd	Polyporaceae, Polyporales, Agaricomycetes, Basidiomycota	MNHN 36		DUPONT Joëlle				Wood-saprotroph WR			ITS sequencing	ITS-BRFM 76
77	Radulodon copelandii	Radulodon copelandii (Pat.) N. Maek.	Meruliaceae, Polyporales, Agaricomycetes, Basidiomycota		IMB W9402	GUO Lin				Wood-saprotroph WR	wood	Sichuan, China	ITS sequencing	ITS-BRFM 77
78	Trametes versicolor	Trametes versicolor (L.) Lloyd	Polyporaceae, Polyporales, Agaricomycetes, Basidiomycota	MUCL 28407						Wood-saprotroph WR	wood, Mont-Saint-Guibert, wooden terrace	Russia	ITS sequencing	ITS-BRFM 78
79	Hericium erinaceus	Hericium erinaceus (Bull.) Pers.	Hericiaceae, Russulales, Agaricomycetes, Basidiomycota	CBS 233.87						Wood-saprotroph WR	wood, near Farfax	Virginia, USA	ITS sequencing	ITS-BRFM 79
80	Trametes versicolor	Trametes versicolor (L.) Lloyd	Polyporaceae, Polyporales, Agaricomycetes, Basidiomycota	ATCC 42530						Wood-saprotroph WR	wood	Czechoslovakia	ITS sequencing	ITS-BRFM 80
81	Bjerkandera adusta	Bjerkandera adusta (Willd.) P. Karst.	Meruliaceae, Polyporales, Agaricomycetes, Basidiomycota	CBS 595.78						Wood-saprotroph WR	wood, Schovenhorst near Putten Netherlands	Netherlands	ITS sequencing	ITS-BRFM 81
82	Lentinula edodes	Lentinula edodes (Berk.) Pegler	Omphalotaceae, Agaricales, Agaricomycetes, Basidiomycota		IMB Q9427	GUO Lin				Wood-saprotroph WR		China	ITS sequencing	ITS-BRFM 82
83	Gloeophyllum abietinum	Gloeophyllum abietinum (Bull.) P. Karst.	Gloeophyllaceae, Gloeophyllales, Agaricomycetes, Basidiomycota		CIRAD 155	DUCOUSSO Marc			DUCOUSSO Marc	Wood-saprotroph BR		France	ITS sequencing	ITS-BRFM 83
84	Phellinus laevigatus	Phellinus laevigatus (Fr.) Bourdot & Galzin	Hymenochaetaceae, Hymenochaetales, Agaricomycetes, Basidiomycota	MUCL 1006, CBS 256.30						Wood-saprotroph WR	wood	Siberia, Russia	ITS sequencing	ITS-BRFM 84
85	Pycnoporus cinnabarinus	Pycnoporus cinnabarinus (Jacq.) P. Karst.	Polyporaceae, Polyporales, Agaricomycetes, Basidiomycota	MUCL 38479, CBS 373.34						Wood-saprotroph WR		Belgium	ITS sequencing	ITS-BRFM 85
86	Bondarzewia berkeleyi	Bondarzewia berkeleyi (Fr.) Bondartsev & Singer	Bondarzewiaceae, Russulales, Agaricomycetes, Basidiomycota	CBS 312.36, ATCC 26313						Plant-pathogen		North Carolina, USA	ITS sequencing	ITS-BRFM 86
87	Porodaedalea pini	Porodaedalea pini (Brot.) Murrill	Hymenochaetaceae, Hymenochaetales, Agaricomycetes, Basidiomycota	CBS 210.36						Plant-pathogen	wood, Priest River	Idaho, USA	ITS sequencing	ITS-BRFM 87
88	Lentinula edodes	Lentinula edodes (Berk.) Pegler	Omphalotaceae, Agaricales, Agaricomycetes, Basidiomycota	MUCL 28740						Wood-saprotroph WR	Cultivated mushrooms, Merelbeke, Mycoblank	Belgium	ITS sequencing	ITS-BRFM 88
89	Agaricus bisporus	Agaricus bisporus (J.E. Lange) Imbach	Agaricaceae, Agaricales, Agaricomycetes, Basidiomycota	MUCL 11238						Litter-saprotroph	Cultivated mushrooms		ITS sequencing	ITS-BRFM 89
90	Pycnoporus cinnabarinus	Pycnoporus cinnabarinus (Jacq.) P. Karst.	Polyporaceae, Polyporales, Agaricomycetes, Basidiomycota		MIC 18	LESAGE-MEESSEN Laurence				Wood-saprotroph WR			ITS sequencing	ITS-BRFM 90
91	Dichostereum effuscatum	Dichostereum effuscatum (Cooke & Ellis) Boidin & Lanq.	Lachnocladiaceae, Russulales, Agaricomycetes, Basidiomycota		OD 85-01	ODIER Etienne			ODIER Etienne	Wood-saprotroph WR		France	ITS sequencing	ITS-BRFM 91
92	Agaricus bisporus	Agaricus bisporus (J.E. Lange) Imbach	Agaricaceae, Agaricales, Agaricomycetes, Basidiomycota	MUCL 28514						Litter-saprotroph	Kapellen (De Zwamdraad)	Belgium	ITS sequencing	ITS-BRFM 92
93	Lentinula edodes	Lentinula edodes (Berk.) Pegler	Omphalotaceae, Agaricales, Agaricomycetes, Basidiomycota	MUCL 29756						Wood-saprotroph WR		China	ITS sequencing	ITS-BRFM 93
94	Lentinus sajor-caju	Lentinus sajor-caju (Fr.) Fr.	Polyporaceae, Polyporales, Agaricomycetes, Basidiomycota	MUCL 28683						Wood-saprotroph WR	Selangor	Malaysia	ITS sequencing	ITS-BRFM 94
95	Grifola frondosa	Grifola frondosa (Dicks.) Gray	Fomitopsidaceae, Polyporales, Agaricomycetes, Basidiomycota	CBS 317.29						Wood-saprotroph WR		Canada	ITS sequencing	ITS-BRFM 95
96	Phlebia radiata	Phlebia radiata Fr.	Meruliaceae, Polyporales, Agaricomycetes, Basidiomycota	MUCL 28219						Wood-saprotroph WR	on branch	Luxembourg	ITS sequencing	ITS-BRFM 96
97	Paecilomyces variotii	Paecilomyces variotii Bainier	Trichocomaceae, Eurotiales, Eurotiomycetes, Ascomycota	MUCL 28533						Saprotroph SR	timber wood	Belgium	ITS sequencing	ITS-BRFM 97
98	Paecilomyces variotii	Paecilomyces variotii Bainier	Trichocomaceae, Eurotiales, Eurotiomycetes, Ascomycota	MUCL 19202						Saprotroph SR	wood	Brazil	ITS sequencing	ITS-BRFM 98
99	Aspergillus flavus	Aspergillus flavus Link	Aspergillaceae, Eurotiales, Eurotiomycetes, Ascomycota		CAH 99-01	CAHAGNIER Bernard			CAHAGNIER Bernard	Saprotroph SR		Loire-Atlantique, France	ITS sequencing	ITS-BRFM 99
100	Epicoccum nigrum	Epicoccum nigrum Link	Didymellaceae, Pleosporales, Dothideomycetes, Ascomycota		CAH 99-02	CAHAGNIER Bernard			CAHAGNIER Bernard	Saprotroph SR		Loire-Atlantique, France	ITS sequencing	ITS-BRFM 100
102	Penicillium purpurogenum	Penicillium purpurogenum Stoll sensu Raper & Thom	Aspergillaceae, Eurotiales, Eurotiomycetes, Ascomycota		CAH 99-04	CAHAGNIER Bernard			CAHAGNIER Bernard	Saprotroph SR		Loire-Atlantique, France	ITS sequencing	ITS-BRFM 102
103	Aspergillus brasiliensis	Aspergillus brasiliensis Varga	Aspergillaceae, Eurotiales, Eurotiomycetes, Ascomycota		CAH 99-05	CAHAGNIER Bernard			CAHAGNIER Bernard	Saprotroph SR		Loire-Atlantique, France	ITS sequencing	ITS-BRFM 103
107	Aspergillus niger	Aspergillus niger Tiegh.	Aspergillaceae, Eurotiales, Eurotiomycetes, Ascomycota		F38	CAHAGNIER Bernard			SAYADI Sami	Saprotroph SR	Olive waste water, isolated from olive waste water	Tunisia	ITS sequencing	ITS-BRFM 107
108	Grifola frondosa	Grifola frondosa (Dicks.) Gray	Fomitopsidaceae, Polyporales, Agaricomycetes, Basidiomycota		MNHN	DUPONT Joëlle				Wood-saprotroph WR			ITS sequencing	ITS-BRFM 108
109	Aspergillus giganteus	Aspergillus giganteus Wehmer	Aspergillaceae, Eurotiales, Eurotiomycetes, Ascomycota		CAH 99-09	CAHAGNIER Bernard			CAHAGNIER Bernard	Saprotroph SR		Loire-Atlantique, France	ITS sequencing	ITS-BRFM 109
110	Penicillium variabile	Penicillium variabile Sopp	Aspergillaceae, Eurotiales, Eurotiomycetes, Ascomycota		CAH 99-10	CAHAGNIER Bernard			CAHAGNIER Bernard	Saprotroph SR		Loire-Atlantique, France	ITS sequencing	ITS-BRFM 110
111	Aspergillus terreus	Aspergillus terreus Thom	Aspergillaceae, Eurotiales, Eurotiomycetes, Ascomycota		CAH 99-11	CAHAGNIER Bernard			CAHAGNIER Bernard	Saprotroph SR		Loire-Atlantique, France	ITS sequencing	ITS-BRFM 111
112	Paecilomyces farinosus	Paecilomyces farinosus (Holmsk.) A.H.S. Br. & G. Sm.	Cordycipitaceae, Hypocreales, Sordariomycetes, Ascomycota	MUCL 4160						Saprotroph SR	wood , Chelsea, Gatineau Park, Forest	Canada	ITS sequencing	ITS-BRFM 112
113	Paecilomyces variotii	Paecilomyces variotii Bainier	Trichocomaceae, Eurotiales, Eurotiomycetes, Ascomycota		CAH 99-12	CAHAGNIER Bernard			CAHAGNIER Bernard	Saprotroph SR		Loire-Atlantique, France
114	Aspergillus tamarii	Aspergillus tamarii Kita	Aspergillaceae, Eurotiales, Eurotiomycetes, Ascomycota	MUCL 2127						Saprotroph SR	rubber and plastic insulation	New Guinea	ITS sequencing	ITS-BRFM 114
115	Aspergillus niger	Aspergillus niger Tiegh.	Aspergillaceae, Eurotiales, Eurotiomycetes, Ascomycota		IMB AS3.315	GUO Lin				Saprotroph SR		China	ITS sequencing	ITS-BRFM 115
116	Aspergillus niger	Aspergillus niger Tiegh.	Aspergillaceae, Eurotiales, Eurotiomycetes, Ascomycota		IMB AS3.3927	GUO Lin				Saprotroph SR		China	ITS sequencing	ITS-BRFM 116
118	Aspergillus awamori	Aspergillus awamori Nakaz.	Aspergillaceae, Eurotiales, Eurotiomycetes, Ascomycota	MUCL 15974						Saprotroph SR	wheat flour		ITS sequencing	ITS-BRFM 118
119	Aspergillus giganteus	Aspergillus giganteus Wehmer	Aspergillaceae, Eurotiales, Eurotiomycetes, Ascomycota	MUCL 29012						Saprotroph SR	rotten wood Pinus sylvestris, Ottignies, Bois des Rêves	Belgium	ITS sequencing	ITS-BRFM 119
120	Aspergillus tamarii	Aspergillus tamarii Kita	Aspergillaceae, Eurotiales, Eurotiomycetes, Ascomycota	MUCL 731						Saprotroph SR	seed, Gossypium hirsutum	Ubangi, Zaire	ITS sequencing	ITS-BRFM 120
121	Aspergillus tamarii	Aspergillus tamarii Kita	Aspergillaceae, Eurotiales, Eurotiomycetes, Ascomycota	MUCL 6230						Saprotroph SR	seed, leguminosae	Brazil	ITS sequencing	ITS-BRFM 121
122	Aspergillus tamarii	Aspergillus tamarii Kita	Aspergillaceae, Eurotiales, Eurotiomycetes, Ascomycota	MUCL 28706						Saprotroph SR	seeds, Sorghum vulgare	Rwanda	ITS sequencing	ITS-BRFM 122
123	Aspergillus sydowii	Aspergillus sydowii (Bainier & Sartory) Thom & Church	Aspergillaceae, Eurotiales, Eurotiomycetes, Ascomycota	MUCL 15976						Saprotroph SR	wheat flour		ITS sequencing	ITS-BRFM 123
124	Eurotium chevalieri	Eurotium chevalieri L. Mangin	Aspergillaceae, Eurotiales, Eurotiomycetes, Ascomycota		CAH 99-13	CAHAGNIER Bernard			CAHAGNIER Bernard	Saprotroph SR		Loire-Atlantique, France	ITS sequencing	ITS-BRFM 124
127	Phanerochaete chrysosporium	Phanerochaete chrysosporium Burds.	Phanerochaetaceae, Polyporales, Agaricomycetes, Basidiomycota	ATCC 24725, MIC 249, I-1511, BKM F1767						Wood-saprotroph WR		Alma Ata Region, Kazakhstan	ITS sequencing	ITS-BRFM 127
128	Aspergillus niger	Aspergillus niger Tiegh.	Aspergillaceae, Eurotiales, Eurotiomycetes, Ascomycota	MUCL 28820, ATCC 13496						Saprotroph SR	Soil	Louisiana, USA	ITS sequencing	ITS-BRFM 128
129	Aspergillus niger	Aspergillus niger Tiegh.	Aspergillaceae, Eurotiales, Eurotiomycetes, Ascomycota	MUCL 28817, ATCC 10864, CBS 122.49						Saprotroph SR	chinese gall		ITS sequencing	ITS-BRFM 129
130	Aspergillus niger	Aspergillus niger Tiegh.	Aspergillaceae, Eurotiales, Eurotiomycetes, Ascomycota	MUCL 28699						Saprotroph SR	seed Sorghum vulgare	Sudan	ITS sequencing	ITS-BRFM 130
131	Aspergillus niger	Aspergillus niger Tiegh.	Aspergillaceae, Eurotiales, Eurotiomycetes, Ascomycota	MUCL 28698						Saprotroph SR	seed Sorghum vulgare	Sudan	ITS sequencing	ITS-BRFM 131
132	Aspergillus niger	Aspergillus niger Tiegh.	Aspergillaceae, Eurotiales, Eurotiomycetes, Ascomycota	MUCL 19001, ATCC 9642, CBS 246.65						Saprotroph SR	wireless radio equipment	New South Wales, Australia	ITS sequencing	ITS-BRFM 132
134	Aspergillus niger	Aspergillus niger Tiegh.	Aspergillaceae, Eurotiales, Eurotiomycetes, Ascomycota	MUCL 15973						Saprotroph SR	Wheat flour	Belgium	ITS sequencing	ITS-BRFM 134
135	Aspergillus niger	Aspergillus niger Tiegh.	Aspergillaceae, Eurotiales, Eurotiomycetes, Ascomycota	MUCL 745						Saprotroph SR	seed gossypium hirsutum	Zaire	ITS sequencing	ITS-BRFM 135
138	Phanerochaete chrysosporium	Phanerochaete chrysosporium Burds.	Phanerochaetaceae, Polyporales, Agaricomycetes, Basidiomycota		MIC 247	ODIER Etienne				Wood-saprotroph WR			ITS sequencing	ITS-BRFM 138
139	Trichoderma viride	Trichoderma viride Pers.	Hypocreaceae, Hypocreales, Sordariomycetes, Ascomycota	MUCL 7840						Saprotroph SR	Basidiocarp (amanita phalloides), Arenberg Park	Belgium	ITS sequencing	ITS-BRFM 139
140	Mycetinis scorodonius	Marasmius scorodonius (Fr.) Fr.	Marasmiaceae, Agaricales, Agaricomycetes, Basidiomycota	CBS 251.48						Litter-saprotroph		France	ITS sequencing	ITS-BRFM 140
141	Fomes fomentarius	Fomes fomentarius (L.) Fr.	Polyporaceae, Polyporales, Agaricomycetes, Basidiomycota		IMB 98416	GUO Lin				Wood-saprotroph WR	wood	Beijin, China	ITS sequencing	ITS-BRFM 141
142	Aspergillus oryzae	Aspergillus oryzae (Ahlb.) Cohn	Aspergillaceae, Eurotiales, Eurotiomycetes, Ascomycota	MUCL 18821						Saprotroph SR	peanut for cattle feed	Belgium	ITS sequencing	ITS-BRFM 142
144	Aspergillus flavipes	Aspergillus flavipes (Bainier & Sartory) Thom & Church	Aspergillaceae, Eurotiales, Eurotiomycetes, Ascomycota		CAH 99-15	CAHAGNIER Bernard				Saprotroph SR		Loire-Atlantique, France	ITS sequencing	ITS-BRFM 144
145	Pycnoporus cinnabarinus	Pycnoporus cinnabarinus (Jacq.) P. Karst.	Polyporaceae, Polyporales, Agaricomycetes, Basidiomycota		MIC 11	LESAGE-MEESSEN Laurence			LESAGE-MEESSEN Laurence	Wood-saprotroph WR		France	ITS sequencing	ITS-BRFM 145
146	Pycnoporus cinnabarinus	Pycnoporus cinnabarinus (Jacq.) P. Karst.	Polyporaceae, Polyporales, Agaricomycetes, Basidiomycota	MUCL 30555						Wood-saprotroph WR	wood, Lauzelle forest	Belgium	ITS sequencing	ITS-BRFM 146
149	Trichothecium roseum	Trichothecium roseum (Pers.) Link	Hypocreaceae, Hypocreales, Sordariomycetes, Ascomycota		CAH 99-16	CAHAGNIER Bernard			CAHAGNIER Bernard	Entomo-pathogen		Loire-Atlantique, France	ITS sequencing	ITS-BRFM 149
150	Coriolopsis trogii	Coriolopsis trogii (Berk.) Domanski	Polyporaceae, Polyporales, Agaricomycetes, Basidiomycota		IMB 5.629	GUO Lin				Wood-saprotroph WR		China	ITS sequencing	ITS-BRFM 150
151	Aspergillus niger	Aspergillus niger Tiegh.	Aspergillaceae, Eurotiales, Eurotiomycetes, Ascomycota	ATCC 11414						Saprotroph SR			ITS sequencing	ITS-BRFM 151
153	Pholiota adiposa	Pholiota adiposa (Batsch) P. Kumm.	Strophariaceae, Agaricales, Agaricomycetes, Basidiomycota	CBS 279.29, MUCL 7900						Wood-saprotroph	Acer (Aceraceae)	Ontario, Canada	ITS sequencing	ITS-BRFM 153
155	Lenzites betulina	Lenzites betulina (L.) Fr.	Polyporaceae, Polyporales, Agaricomycetes, Basidiomycota	CBS 222.33						Wood-saprotroph WR	gymnosperm wood		ITS sequencing	ITS-BRFM 155
156	Polyporus tuberaster	Polyporus tuberaster (Jacq. ex Pers.) Fr.	Polyporaceae, Polyporales, Agaricomycetes, Basidiomycota	CBS 442.85						Wood-saprotroph WR	wood Quercus, near Black Sea	Arkutino, Bulgaria
158	Ceriporiopsis subvermispora	Ceriporiopsis subvermispora (Pilát) Gilb. & Ryvarden	Meruliaceae, Polyporales, Agaricomycetes, Basidiomycota	DAOM 21398						Wood-saprotroph WR			ITS sequencing	ITS-BRFM 158
159	Penicillium rubrum	Penicillium rubrum Stoll	Aspergillaceae, Eurotiales, Eurotiomycetes, Ascomycota		LAB 2	LESAGE-MEESSEN Laurence			LESAGE-MEESSEN Laurence	Saprotroph SR		France	ITS sequencing	ITS-BRFM 159
160	Aspergillus tamarii	Aspergillus tamarii Kita	Aspergillaceae, Eurotiales, Eurotiomycetes, Ascomycota	MUCL 14048						Saprotroph SR	soil	Zaire	ITS sequencing	ITS-BRFM 160
161	Aspergillus oryzae	Aspergillus oryzae (Ahlb.) Cohn	Aspergillaceae, Eurotiales, Eurotiomycetes, Ascomycota		IMB 3.762	GUO Lin				Saprotroph SR		China	ITS sequencing	ITS-BRFM 161
162	Lentinula edodes	Lentinula edodes (Berk.) Pegler	Omphalotaceae, Agaricales, Agaricomycetes, Basidiomycota		IMB 5.399	GUO Lin				Wood-saprotroph WR		China	ITS sequencing	ITS-BRFM 162
163	Penicillium aurantiogriseum	Penicillium aurantiogriseum Dierckx	Aspergillaceae, Eurotiales, Eurotiomycetes, Ascomycota		LMTC	CAHAGNIER Bernard			CAHAGNIER Bernard	Saprotroph SR		Loire-Atlantique, France	ITS sequencing	ITS-BRFM 163
164	Phanerochaete chrysosporium	Phanerochaete chrysosporium Burds.	Phanerochaetaceae, Polyporales, Agaricomycetes, Basidiomycota	ATCC 24725, MIC 249, I-1511, BKM F1767						Wood-saprotroph WR	Vitis vinifera	Alma Ata Region, Kazakhstan	ITS sequencing	ITS-BRFM 164
166	Pycnoporus sanguineus	Pycnoporus sanguineus (L.) Murrill	Polyporaceae, Polyporales, Agaricomycetes, Basidiomycota		IMB W28	GUO Lin				Wood-saprotroph WR		China	ITS sequencing	ITS-BRFM 166
167	Spongipellis litschaueri	Spongipellis litschaueri Lohwag	Polyporaceae, Polyporales, Agaricomycetes, Basidiomycota		IMB W161	GUO Lin				Wood-saprotroph		China	ITS sequencing	ITS-BRFM 167
204	Pycnoporus sanguineus	Pycnoporus sanguineus (L.) Murrill	Polyporaceae, Polyporales, Agaricomycetes, Basidiomycota		G05-42	GUO Lin			GUO Lin	Wood-saprotroph WR		Guangdong, China	ITS sequencing	ITS-BRFM 204
205	Pycnoporus sanguineus	Pycnoporus sanguineus (L.) Murrill	Polyporaceae, Polyporales, Agaricomycetes, Basidiomycota		G05-43	GUO Lin			GUO Lin	Wood-saprotroph WR		Guangdong, China	ITS sequencing	ITS-BRFM 205
206	Pycnoporus sanguineus	Pycnoporus sanguineus (L.) Murrill	Polyporaceae, Polyporales, Agaricomycetes, Basidiomycota		G05-45	GUO Lin			GUO Lin	Wood-saprotroph WR		Guangdong, China	ITS sequencing	ITS-BRFM 206
207	Pycnoporus sanguineus	Pycnoporus sanguineus (L.) Murrill	Polyporaceae, Polyporales, Agaricomycetes, Basidiomycota		G05-46	GUO Lin			GUO Lin	Wood-saprotroph WR		Guangdong, China	ITS sequencing	ITS-BRFM 207
219	Pycnoporus cinnabarinus	Pycnoporus cinnabarinus (Jacq.) P. Karst.	Polyporaceae, Polyporales, Agaricomycetes, Basidiomycota		Agossin 58	ODIER Etienne				Wood-saprotroph WR		France	ITS sequencing	ITS-BRFM 219
222	Lentinula edodes	Lentinula edodes (Berk.) Pegler	Omphalotaceae, Agaricales, Agaricomycetes, Basidiomycota	CBS 454.69						Wood-saprotroph WR		Japan	ITS sequencing	ITS-BRFM 222
226	Hypocrea lixii	Hypocrea lixii Pat.	Hypocreaceae, Hypocreales, Sordariomycetes, Ascomycota		CAH 99-20	CAHAGNIER Bernard			CAHAGNIER Bernard	Saprotroph SR		Loire-Atlantique, France	ITS sequencing	ITS-BRFM 226
230	Lentinula edodes	Lentinula edodes (Berk.) Pegler	Omphalotaceae, Agaricales, Agaricomycetes, Basidiomycota		IMB G18	GUO Lin				Wood-saprotroph WR	wood	Chongqing, China	ITS sequencing	ITS-BRFM 230
231	Pycnoporus cinnabarinus	Pycnoporus cinnabarinus (Jacq.) P. Karst.	Polyporaceae, Polyporales, Agaricomycetes, Basidiomycota		M178	KAPITCH Alexander				Wood-saprotroph WR		Russia	ITS sequencing	ITS-BRFM 231
233	Cyathus stercoreus	Cyathus stercoreus (Schwein.) De Toni	Agaricaceae, Agaricales, Agaricomycetes, Basidiomycota	NRRL 6473						Wood-saprotroph WR	Cattle dung	Michigan, USA	ITS sequencing	ITS-BRFM 233
234	Cyathus pallidus	Cyathus pallidus Berk. & M.A. Curtis	Agaricaceae, Agaricales, Agaricomycetes, Basidiomycota		IMB W9801	GUO Lin				Wood-saprotroph WR	wood	Guangdong, China	ITS sequencing	ITS-BRFM 234
236	Gloeophyllum trabeum	Gloeophyllum trabeum (Pers.) Murrill	Gloeophyllaceae, Gloeophyllales, Agaricomycetes, Basidiomycota	CBS 335.49						Wood-saprotroph BR		Germany	ITS sequencing	ITS-BRFM 236
237	Pycnoporus cinnabarinus	Pycnoporus cinnabarinus (Jacq.) P. Karst.	Polyporaceae, Polyporales, Agaricomycetes, Basidiomycota		M175	KAPITCH Alexander				Wood-saprotroph WR		Russia	ITS sequencing	ITS-BRFM 237
238	Heterobasidion annosum	Heterobasidion annosum (Fr.) Bref.	Bondarzewiaceae, Russulales, Agaricomycetes, Basidiomycota		LAB 3	HAON Mireille			HAON Mireille	Plant-pathogen WR			ITS sequencing	ITS-BRFM 238
248	Ischnoderma benzoinum	Ischnoderma benzoinum (Wahlenb.) P. Karst.	Fomitopsidaceae, Polyporales, Agaricomycetes, Basidiomycota	CBS 145.80						Wood-saprotroph WR	Pinus sylvestris (Pinaceae)	Netherlands	ITS sequencing	ITS-BRFM 248
251	Phlebia radiata	Phlebia radiata Fr.	Meruliaceae, Polyporales, Agaricomycetes, Basidiomycota		LAB 4	HAON Mireille			HAON Mireille	Wood-saprotroph WR		France	ITS sequencing	ITS-BRFM 251
253	Ischnoderma benzoinum	Ischnoderma benzoinum (Wahlenb.) P. Karst.	Fomitopsidaceae, Polyporales, Agaricomycetes, Basidiomycota	CBS 250.30						Wood-saprotroph WR	Abies sibirica (Pinaceae)	Altai, Russia	ITS sequencing	ITS-BRFM 253
254	Microporus affinis	Microporus affinis (Blume & T. Nees) Kuntze	Polyporaceae, Polyporales, Agaricomycetes, Basidiomycota		IMB H2110	GUO Lin				Wood-saprotroph		China	ITS sequencing	ITS-BRFM 254
274	Bjerkandera adusta	Bjerkandera adusta (Willd.) P. Karst.	Meruliaceae, Polyporales, Agaricomycetes, Basidiomycota		LAB 5	HAON Mireille			HAON Mireille	Wood-saprotroph WR		France	ITS sequencing	ITS-BRFM 274
275	Pycnoporus coccineus	Pycnoporus cinnabarinus (Jacq.) P. Karst.	Polyporaceae, Polyporales, Agaricomycetes, Basidiomycota	MUCL 38420, CBS 311.33						Wood-saprotroph WR		Australia	ITS sequencing	ITS-BRFM 275
276	Phanerochaete chrysosporium	Phanerochaete chrysosporium Burds.	Phanerochaetaceae, Polyporales, Agaricomycetes, Basidiomycota	ATCC 34541, ME-446						Wood-saprotroph WR	Rotten beech wood chip, Fagus grandifolia	Waterville, Maine, USA	ITS sequencing	ITS-BRFM 276
279	Aspergillus wentii	Aspergillus wentii Wehmer	Aspergillaceae, Eurotiales, Eurotiomycetes, Ascomycota	MUCL 1049						Saprotroph SR	tropical greenhouse, Heverlee	Belgium	ITS sequencing	ITS-BRFM 279
280	Aspergillus niger	Aspergillus niger Tiegh.	Aspergillaceae, Eurotiales, Eurotiomycetes, Ascomycota		CS 180	LESAGE-MEESSEN Laurence			LESAGE-MEESSEN Laurence	Saprotroph SR			ITS sequencing	ITS-BRFM 280
281	Aspergillus niger	Aspergillus niger Tiegh.	Aspergillaceae, Eurotiales, Eurotiomycetes, Ascomycota		I-1472	LESAGE-MEESSEN Laurence			LESAGE-MEESSEN Laurence	Saprotroph SR			ITS sequencing	ITS-BRFM 281
282	Aspergillus niger	Aspergillus niger Tiegh.	Aspergillaceae, Eurotiales, Eurotiomycetes, Ascomycota	CBS 120.49, ATCC 9029, DSM 2466, MUCL 30, NRRL 3						Saprotroph SR			ITS sequencing	ITS-BRFM 282
283	Pycnoporus sanguineus	Pycnoporus sanguineus (L.) Murrill	Polyporaceae, Polyporales, Agaricomycetes, Basidiomycota	MUCL 29375						Wood-saprotroph WR	wood, ocean	Tamatave, Madagascar	ITS sequencing	ITS-BRFM 283
347	Bjerkandera sp.	Bjerkandera P. Karst.	Meruliaceae, Polyporales, Agaricomycetes, Basidiomycota		BOS55	ASTHER Marcel			ASTHER Marcel	Wood-saprotroph WR
348	Phlebia radiata	Phlebia radiata Fr.	Meruliaceae, Polyporales, Agaricomycetes, Basidiomycota		LAB 6	HAON Mireille			HAON Mireille	Wood-saprotroph WR		France	ITS sequencing	ITS-BRFM 348
349	Phanerochaete sordida	Phanerochaete sordida (P. Karst.) J. Erikss. & Ryvarden	Phanerochaetaceae, Polyporales, Agaricomycetes, Basidiomycota	IHEM 3730						Wood-saprotroph WR	wooden pallet	Belgium	ITS sequencing	ITS-BRFM 349
350	Perenniporia subacida	Perenniporia subacida (Peck) Donk	Polyporaceae, Polyporales, Agaricomycetes, Basidiomycota		FPPL 104	ODIER Etienne			ODIER Etienne	Wood-saprotroph WR			ITS sequencing	ITS-BRFM 350
351	Pycnoporus cinnabarinus	Pycnoporus cinnabarinus (Jacq.) P. Karst.	Polyporaceae, Polyporales, Agaricomycetes, Basidiomycota		souche 11	ODIER Etienne			ODIER Etienne	Wood-saprotroph WR			ITS sequencing	ITS-BRFM 351
353	Lentinula edodes	Lentinula edodes (Berk.) Pegler	Omphalotaceae, Agaricales, Agaricomycetes, Basidiomycota		ODI 2	ODIER Etienne			ODIER Etienne	Wood-saprotroph WR			ITS sequencing	ITS-BRFM 353
354	Pycnoporus cinnabarinus	Pycnoporus cinnabarinus (Jacq.) P. Karst.	Polyporaceae, Polyporales, Agaricomycetes, Basidiomycota		Agossin 14	ODIER Etienne			ODIER Etienne	Wood-saprotroph WR			ITS sequencing	ITS-BRFM 354
355	Pycnoporus cinnabarinus	Pycnoporus cinnabarinus (Jacq.) P. Karst.	Polyporaceae, Polyporales, Agaricomycetes, Basidiomycota		ODI 3	ODIER Etienne			ODIER Etienne	Wood-saprotroph WR			ITS sequencing	ITS-BRFM 355
356	Pycnoporus cinnabarinus	Pycnoporus cinnabarinus (Jacq.) P. Karst.	Polyporaceae, Polyporales, Agaricomycetes, Basidiomycota		ODI 4	ODIER Etienne			ODIER Etienne	Wood-saprotroph WR			ITS sequencing	ITS-BRFM 356
357	Neolentinus lepideus	Neolentinus lepideus (Fr.) Redhead & Ginns	Gloeophyllaceae, Gloeophyllales, Agaricomycetes, Basidiomycota	ATCC 12653						Wood-saprotroph BR	Jack pine railroad tie rod	Canada	ITS sequencing	ITS-BRFM 357
358	Postia placenta	Postia placenta (Fr.) M.J. Larsen & Lombard	Fomitopsidaceae, Polyporales, Agaricomycetes, Basidiomycota	ATCC 11538						Wood-saprotroph BR	Douglas-fir boat timbers	Maryland, USA	ITS sequencing	ITS-BRFM 358
379	Pycnoporus cinnabarinus	Pycnoporus cinnabarinus (Jacq.) P. Karst.	Polyporaceae, Polyporales, Agaricomycetes, Basidiomycota	ATCC 200478						Wood-saprotroph WR	decaying pine wood, Sidney	New South Wales, Australia	ITS sequencing	ITS-BRFM 379
382	Phanerochaete chrysosporium	Phanerochaete chrysosporium Burds.	Phanerochaetaceae, Polyporales, Agaricomycetes, Basidiomycota	ATCC 24725, MUCL 19343, CBS 481.73, MIC 249, I-1511, BKM F1767						Wood-saprotroph WR	Vitis vinifera (Vitaceae), fruit a petiole	Alma Ata Region, Kazakhstan	ITS sequencing	ITS-BRFM 382
384	Agaricus bisporus	Agaricus bisporus (J.E. Lange) Imbach	Agaricaceae, Agaricales, Agaricomycetes, Basidiomycota	CBS 204.49						Litter-saprotroph	Cultivated mushrooms	Sweden	ITS sequencing	ITS-BRFM 384
385	Gloeophyllum trabeum	Gloeophyllum trabeum (Pers.) Murrill	Gloeophyllaceae, Gloeophyllales, Agaricomycetes, Basidiomycota		MNHN	DUPONT Joëlle				Wood-saprotroph BR			ITS sequencing	ITS-BRFM 385
386	Phlebia radiata	Phlebia radiata Fr.	Meruliaceae, Polyporales, Agaricomycetes, Basidiomycota	DAOM 523.09						Wood-saprotroph WR			ITS sequencing	ITS-BRFM 386
387	Phanerochaete chrysosporium	Phanerochaete chrysosporium Burds.	Phanerochaetaceae, Polyporales, Agaricomycetes, Basidiomycota		INA 6	ODIER Etienne			ODIER Etienne	Wood-saprotroph WR		France	ITS sequencing	ITS-BRFM 387
389	Phanerochaete chrysosporium	Phanerochaete chrysosporium Burds.	Phanerochaetaceae, Polyporales, Agaricomycetes, Basidiomycota		ODI-5	ODIER Etienne			ODIER Etienne	Wood-saprotroph WR			ITS sequencing	ITS-BRFM 389
391	Pycnoporus cinnabarinus	Pycnoporus cinnabarinus (Jacq.) P. Karst.	Polyporaceae, Polyporales, Agaricomycetes, Basidiomycota		Agossin 362	ODIER Etienne			ODIER Etienne	Wood-saprotroph WR			ITS sequencing	ITS-BRFM 391
392	Phanerochaete chrysosporium	Phanerochaete chrysosporium Burds.	Phanerochaetaceae, Polyporales, Agaricomycetes, Basidiomycota		UK5	ODIER Etienne			ODIER Etienne	Wood-saprotroph WR			ITS sequencing	ITS-BRFM 392
393	Dichomitus squalens	Dichomitus squalens (P. Karst.) D.A. Reid	Polyporaceae, Polyporales, Agaricomycetes, Basidiomycota	CBS 432.34						Wood-saprotroph WR		Poland	ITS sequencing	ITS-BRFM 393
394	Ceriporiopsis subvermispora	Ceriporiopsis subvermispora (Pilát) Gilb. & Ryvarden	Meruliaceae, Polyporales, Agaricomycetes, Basidiomycota		ODI-7	ODIER Etienne			ODIER Etienne	Wood-saprotroph WR			ITS sequencing	ITS-BRFM 394
395	Phanerochaete chrysosporium	Phanerochaete chrysosporium Burds.	Phanerochaetaceae, Polyporales, Agaricomycetes, Basidiomycota		UK6	ODIER Etienne			ODIER Etienne	Wood-saprotroph WR			ITS sequencing	ITS-BRFM 395
396	Pleurotus ostreatus	Pleurotus ostreatus (Jacq.) P. Kumm.	Pleurotaceae, Agaricales, Agaricomycetes, Basidiomycota	CBS 342.69, MUCL 20510						Wood-saprotroph WR		Netherlands	ITS sequencing	ITS-BRFM 396
398	Perenniporia subacida	Perenniporia subacida (Peck) Donk	Polyporaceae, Polyporales, Agaricomycetes, Basidiomycota	CBS 374.52, MUCL 39553						Wood-saprotroph WR	heart-rot in Pinus monticola, Priest River, Priest River	Idaho, USA	ITS sequencing	ITS-BRFM 398
399	Ceriporiopsis subvermispora	Ceriporiopsis subvermispora (Pilát) Gilb. & Ryvarden	Meruliaceae, Polyporales, Agaricomycetes, Basidiomycota	CBS 347.63						Wood-saprotroph WR	Roosevelt National Forest	Colorado, USA	ITS sequencing	ITS-BRFM 399
401	Panus conchatus	Panus conchatus (Bull.) Fr.	Polyporaceae, Polyporales, Agaricomycetes, Basidiomycota		IMB G146	GUO Lin				Wood-saprotroph		China	ITS sequencing	ITS-BRFM 401
402	Ganoderma lipsiense	Ganoderma applanatum (Pers.) Pat.	Ganodermataceae, Polyporales, Agaricomycetes, Basidiomycota	CBS 250.61						Wood-saprotroph WR		Austria	ITS sequencing	ITS-BRFM 402
405	Aspergillus japonicus	Aspergillus japonicus Saito	Aspergillaceae, Eurotiales, Eurotiomycetes, Ascomycota		3FCM5	PANON Genevieve			PANON Genevieve	Saprotroph SR		Guadeloupe	ITS sequencing	ITS-BRFM 405
406	Mycena sanguinolenta	Mycena sanguinolenta (Alb. & Schwein.) P. Kumm.	Mycenaceae, Agaricales, Agaricomycetes, Basidiomycota		LAB 9	HAON Mireille			HAON Mireille	Wood-saprotroph			ITS sequencing	ITS-BRFM 406
407	Gymnopus peronatus	Gymnopus peronatus (Bolton) Gray	Omphalotaceae, Agaricales, Agaricomycetes, Basidiomycota	CBS 426.79						Litter-saprotroph		France	ITS sequencing	ITS-BRFM 407
408	Stropharia rugosoannulata	Stropharia rugosoannulata Farl. ex Murrill	Strophariaceae, Agaricales, Agaricomycetes, Basidiomycota	CBS 789.73, DSM 2541						Litter-saprotroph	Soil, soil under Zea mays, Laufen an der Salzach near Friedolfing Germany	Bayern, Germany
409	Trichaptum abietinum	Trichaptum abietinum (Pers. ex J.F. Gmel.) Ryvarden	Polyporaceae, Polyporales, Agaricomycetes, Basidiomycota	CBS 375.68, DAOM 72533						Wood-saprotroph WR	Pinus banksiana (Pinaceae), La Domaine de la Vérerye Park	Quebec, Canada	ITS sequencing	ITS-BRFM 409
413	Phanerochaete chrysosporium	Phanerochaete chrysosporium Burds.	Phanerochaetaceae, Polyporales, Agaricomycetes, Basidiomycota		INA 12	ODIER Etienne			ODIER Etienne	Wood-saprotroph WR		France	ITS sequencing	ITS-BRFM 413
419	Aspergillus niger	Aspergillus niger Tiegh.	Aspergillaceae, Eurotiales, Eurotiomycetes, Ascomycota		4DJM1	PANON Genevieve			PANON Genevieve	Saprotroph SR		Guadeloupe	ITS sequencing	ITS-BRFM 419
420	Aspergillus niger	Aspergillus niger Tiegh.	Aspergillaceae, Eurotiales, Eurotiomycetes, Ascomycota		4DJM11	PANON Genevieve			PANON Genevieve	Saprotroph SR		Guadeloupe	ITS sequencing	ITS-BRFM 420
421	Aspergillus niger	Aspergillus niger Tiegh.	Aspergillaceae, Eurotiales, Eurotiomycetes, Ascomycota		4DJM20	PANON Genevieve			PANON Genevieve	Saprotroph SR		Guadeloupe	ITS sequencing	ITS-BRFM 421
422	Aspergillus niger	Aspergillus niger Tiegh.	Aspergillaceae, Eurotiales, Eurotiomycetes, Ascomycota		5DRM4	PANON Genevieve			PANON Genevieve	Saprotroph SR		Guadeloupe	ITS sequencing	ITS-BRFM 422
424	Geotrichum candidum	Geotrichum candidum Link	Dipodascaceae, Saccharomycetales, Saccharomycetes, Ascomycota		CP C490	ODIER Etienne			ODIER Etienne	Not determined			ITS sequencing	ITS-BRFM 424
425	Penicillium sp.	Penicillium Link	Aspergillaceae, Eurotiales, Eurotiomycetes, Ascomycota		C122	ODIER Etienne			ODIER Etienne	Saprotroph SR			ITS sequencing	ITS-BRFM 425
426	Penicillium sp.	Penicillium Link	Aspergillaceae, Eurotiales, Eurotiomycetes, Ascomycota		CP C489	ODIER Etienne			ODIER Etienne	Saprotroph SR			ITS sequencing	ITS-BRFM 426
430	Aspergillus niger	Aspergillus niger Tiegh.	Aspergillaceae, Eurotiales, Eurotiomycetes, Ascomycota		1BDM30	PANON Genevieve			PANON Genevieve	Saprotroph SR		Guadeloupe	ITS sequencing	ITS-BRFM 430
433	Daedalea quercina	Daedalea quercina (L.) Pers.	Fomitopsidaceae, Polyporales, Agaricomycetes, Basidiomycota	MUCL 30382						Wood-saprotroph BR	Louvain-la-Neuve, Bois de Lauzelle	Belgium	ITS sequencing	ITS-BRFM 433
448	Penicillium roqueforti	Penicillium roqueforti Thom	Aspergillaceae, Eurotiales, Eurotiomycetes, Ascomycota	MUCL 29083						Saprotroph SR	Gorgonzola cheese, Cheese	Luxembourg	ITS sequencing	ITS-BRFM 448
449	Aspergillus niger	Aspergillus niger Tiegh.	Aspergillaceae, Eurotiales, Eurotiomycetes, Ascomycota		LMTC 2.7	CAHAGNIER Bernard			CAHAGNIER Bernard	Saprotroph SR		Loire-Atlantique, France	ITS sequencing	ITS-BRFM 449
453	Aspergillus terreus	Aspergillus terreus Thom	Aspergillaceae, Eurotiales, Eurotiomycetes, Ascomycota	MUCL 21932						Saprotroph SR	humic soil	South Africa	ITS sequencing	ITS-BRFM 453
475	Aspergillus niger	Aspergillus niger Tiegh.	Aspergillaceae, Eurotiales, Eurotiomycetes, Ascomycota		MNHN X02.4516	DUPONT Joëlle				Saprotroph SR		Bahamas	ITS sequencing	ITS-BRFM 475
476	Aspergillus niger	Aspergillus niger Tiegh.	Aspergillaceae, Eurotiales, Eurotiomycetes, Ascomycota		MNHN X02.4512	DUPONT Joëlle				Saprotroph SR		Bahamas	ITS sequencing	ITS-BRFM 476
477	Aspergillus niger	Aspergillus niger Tiegh.	Aspergillaceae, Eurotiales, Eurotiomycetes, Ascomycota		MNHN X02.4515	DUPONT Joëlle				Saprotroph SR		Bahamas	ITS sequencing	ITS-BRFM 477
478	Aspergillus niger	Aspergillus niger Tiegh.	Aspergillaceae, Eurotiales, Eurotiomycetes, Ascomycota		MNHN X02.4518	DUPONT Joëlle				Saprotroph SR		Bahamas	ITS sequencing	ITS-BRFM 478
479	Aspergillus niger	Aspergillus niger Tiegh.	Aspergillaceae, Eurotiales, Eurotiomycetes, Ascomycota		MNHN X02.4501	DUPONT Joëlle				Saprotroph SR		Bahamas	ITS sequencing	ITS-BRFM 479
480	Aspergillus niger	Aspergillus niger Tiegh.	Aspergillaceae, Eurotiales, Eurotiomycetes, Ascomycota		MNHN X02.4514	DUPONT Joëlle				Saprotroph SR		Bahamas	ITS sequencing	ITS-BRFM 480
487	Trichoderma viride	Trichoderma viride Pers.	Hypocreaceae, Hypocreales, Sordariomycetes, Ascomycota		MNHN 83.3354	DUPONT Joëlle				Saprotroph SR	wheat bran	France	ITS sequencing	ITS-BRFM 487
488	Aspergillus oryzae	Aspergillus oryzae (Ahlb.) Cohn	Aspergillaceae, Eurotiales, Eurotiomycetes, Ascomycota		LMTC 2.4	CAHAGNIER Bernard			CAHAGNIER Bernard	Saprotroph SR		Loire-Atlantique, France	ITS sequencing	ITS-BRFM 488
493	Cyclocybe cylindracea	Agrocybe aegerita (V. Brig.) Singer	Strophariaceae, Agaricales, Agaricomycetes, Basidiomycota		CMPG 12	SEIGLE-MURANDI Françoise				Wood-saprotroph		Lyon, France	ITS sequencing	ITS-BRFM 493
494	Coniophora arida	Coniophora arida (Fr.) P. Karst.	Coniophoraceae, Boletales, Agaricomycetes, Basidiomycota		CMPG 53	SEIGLE-MURANDI Françoise				Wood-saprotroph	wood Pinus sp.	France	ITS sequencing	ITS-BRFM 494
496	Phanerochaete chrysosporium	Phanerochaete chrysosporium Burds.	Phanerochaetaceae, Polyporales, Agaricomycetes, Basidiomycota		CMPG 333	SEIGLE-MURANDI Françoise				Wood-saprotroph WR	plant: Vitis vinifera	France	ITS sequencing	ITS-BRFM 496
499	Phanerochaete chrysosporium	Phanerochaete chrysosporium Burds.	Phanerochaetaceae, Polyporales, Agaricomycetes, Basidiomycota	ATCC 32629	CMPG 638	SEIGLE-MURANDI Françoise				Wood-saprotroph WR	spruce chips, Picea abies	Sweeden	ITS sequencing	ITS-BRFM 499
500	Phanerochaete chrysosporium	Phanerochaete chrysosporium Burds.	Phanerochaetaceae, Polyporales, Agaricomycetes, Basidiomycota		CMPG 639	SEIGLE-MURANDI Françoise				Wood-saprotroph WR		USA	ITS sequencing	ITS-BRFM 500
503	Ceratobasidium sp.	Ceratobasidium D.P. Rogers	Ceratobasidiaceae, Cantharellales, Agaricomycetes, Basidiomycota		CMPG 722	SEIGLE-MURANDI Françoise				Wood-saprotroph		Sweden
504	Chondrostereum purpureum	Chondrostereum purpureum (Pers.) Pouzar	Cyphellaceae, Agaricales, Agaricomycetes, Basidiomycota		CMPG 659	SEIGLE-MURANDI Françoise				Wood-saprotroph WR		Avignon, France	ITS sequencing	ITS-BRFM 504
505	Aurantiporus fissilis	Aurantiporus fissilis (Berk. & M.A. Curtis) H. Jahn ex Ryvarden…	Polyporaceae, Polyporales, Agaricomycetes, Basidiomycota		CMPG 726	SEIGLE-MURANDI Françoise				Wood-saprotroph	crab shell	Malmö, Sweden	ITS sequencing	ITS-BRFM 505
506	Ceratobasidium sp.	Ceratobasidium D.P. Rogers	Ceratobasidiaceae, Cantharellales, Agaricomycetes, Basidiomycota		CMPG 732	SEIGLE-MURANDI Françoise				Wood-saprotroph		Malmö, Sweden
507	Phanerochaete chrysosporium	Phanerochaete chrysosporium Burds.	Phanerochaetaceae, Polyporales, Agaricomycetes, Basidiomycota		CMPG 763	SEIGLE-MURANDI Françoise				Wood-saprotroph WR	wood	Finland	ITS sequencing	ITS-BRFM 507
510	Oxyporus sp.	Oxyporus (Bourdot & Galzin) Donk	Schizoporaceae, Hymenochaetales, Agaricomycetes, Basidiomycota		CMPG 797	SEIGLE-MURANDI Françoise				Wood-saprotroph		Sweden	ITS sequencing	ITS-BRFM 510
511	Bjerkandera adusta	Bjerkandera adusta (Willd.) P. Karst.	Meruliaceae, Polyporales, Agaricomycetes, Basidiomycota		CMPG 828	SEIGLE-MURANDI Françoise				Wood-saprotroph WR	wood	Sweden	ITS sequencing	ITS-BRFM 511
512	Laetisaria arvalis	Laetisaria arvalis Burds.	Corticiaceae, Corticiales, Agaricomycetes, Basidiomycota		CMPG 835	SEIGLE-MURANDI Françoise				Litter-saprotroph	Soil	Colorado, USA	ITS sequencing	ITS-BRFM 512
514	Laetisaria arvalis	Laetisaria arvalis Burds.	Corticiaceae, Corticiales, Agaricomycetes, Basidiomycota	CBS 131.82	CMPG 934	SEIGLE-MURANDI Françoise				Litter-saprotroph	soil from sugar-beet field	Nebraska, USA	ITS sequencing	ITS-BRFM 514
517	Agaricus bitorquis	Agaricus bitorquis (Quél.) Sacc.	Agaricaceae, Agaricales, Agaricomycetes, Basidiomycota		CMPG 977	SEIGLE-MURANDI Françoise				Litter-saprotroph	Soil	France	ITS sequencing	ITS-BRFM 517
524	Heterobasidion annosum	Heterobasidion annosum (Fr.) Bref.	Bondarzewiaceae, Russulales, Agaricomycetes, Basidiomycota		CMPG 1050	SEIGLE-MURANDI Françoise				Plant-pathogen WR		France	ITS sequencing	ITS-BRFM 524
525	Bjerkandera adusta	Bjerkandera adusta (Willd.) P. Karst.	Meruliaceae, Polyporales, Agaricomycetes, Basidiomycota		CMPG 1085	SEIGLE-MURANDI Françoise				Wood-saprotroph WR	wood	France	ITS sequencing	ITS-BRFM 525
528	Phanerochaete chrysosporium	Phanerochaete chrysosporium Burds.	Phanerochaetaceae, Polyporales, Agaricomycetes, Basidiomycota		CMPG 1195	SEIGLE-MURANDI Françoise				Wood-saprotroph WR			ITS sequencing	ITS-BRFM 528
529	Phanerochaete chrysosporium	Phanerochaete chrysosporium Burds.	Phanerochaetaceae, Polyporales, Agaricomycetes, Basidiomycota		CMPG 1196	SEIGLE-MURANDI Françoise				Wood-saprotroph WR			ITS sequencing	ITS-BRFM 529
530	Phanerochaete chrysosporium	Phanerochaete chrysosporium Burds.	Phanerochaetaceae, Polyporales, Agaricomycetes, Basidiomycota	HHB-6251-Sp	CMPG 1197	SEIGLE-MURANDI Françoise				Wood-saprotroph WR	deadwood, Platanus wrightii, Arizona sycamore (P. fremontii)	Sonoran Desert, Cochise County, Arizona, USA	ITS sequencing	ITS-BRFM 530
531	Phanerochaete chrysosporium	Phanerochaete chrysosporium Burds.	Phanerochaetaceae, Polyporales, Agaricomycetes, Basidiomycota	FP-104297-Sp	CMPG 1198	SEIGLE-MURANDI Françoise				Wood-saprotroph WR		Alma Ata Region, Kazakhstan	ITS sequencing	ITS-BRFM 531
532	Phanerochaete chrysosporium	Phanerochaete chrysosporium Burds.	Phanerochaetaceae, Polyporales, Agaricomycetes, Basidiomycota	HHB-11741-Sp	CMPG 1199	SEIGLE-MURANDI Françoise				Wood-saprotroph WR		Illinois, USA	ITS sequencing	ITS-BRFM 532
533	Phanerochaete chrysosporium	Phanerochaete chrysosporium Burds.	Phanerochaetaceae, Polyporales, Agaricomycetes, Basidiomycota	ME-461	CMPG 1200	SEIGLE-MURANDI Françoise				Wood-saprotroph WR	wood chip, Southern Pine	Fargo, Georgia, USA	ITS sequencing	ITS-BRFM 533
534	Daedalea quercina	Daedalea quercina (L.) Pers.	Fomitopsidaceae, Polyporales, Agaricomycetes, Basidiomycota		CMPG 1220	SEIGLE-MURANDI Françoise				Wood-saprotroph BR			ITS sequencing	ITS-BRFM 534
536	Gloeophyllum sepiarium	Gloeophyllum sepiarium (Wulfen) P. Karst.	Gloeophyllaceae, Gloeophyllales, Agaricomycetes, Basidiomycota		CMPG 1222	SEIGLE-MURANDI Françoise				Wood-saprotroph BR			ITS sequencing	ITS-BRFM 536
537	Oxyporus latemarginatus	Oxyporus latemarginatus (Durieu & Mont.) Donk	Schizoporaceae, Hymenochaetales, Agaricomycetes, Basidiomycota		CMPG 1223	SEIGLE-MURANDI Françoise				Wood-saprotroph WR			ITS sequencing	ITS-BRFM 537
538	Laetiporus sulphureus	Laetiporus sulphureus (Bull.) Murrill	Fomitopsidaceae, Polyporales, Agaricomycetes, Basidiomycota		CMPG 1224	SEIGLE-MURANDI Françoise				Wood-saprotroph BR			ITS sequencing	ITS-BRFM 538
539	Lentinus tigrinus	Lentinus tigrinus (Bull.) Fr.	Polyporaceae, Polyporales, Agaricomycetes, Basidiomycota		CMPG 1225	SEIGLE-MURANDI Françoise				Wood-saprotroph WR			ITS sequencing	ITS-BRFM 539
540	Phellinus pini	Phellinus pini (Brot.) A. Ames	Hymenochaetaceae, Hymenochaetales, Agaricomycetes, Basidiomycota		CMPG 1226	SEIGLE-MURANDI Françoise				Plant-pathogen			ITS sequencing	ITS-BRFM 540
542	Pycnoporus sanguineus	Pycnoporus sanguineus (L.) Murrill	Polyporaceae, Polyporales, Agaricomycetes, Basidiomycota		CMPG 1228	SEIGLE-MURANDI Françoise				Wood-saprotroph WR			ITS sequencing	ITS-BRFM 542
543	Trametes hirsuta	Trametes hirsuta (Wulfen) Pilát	Polyporaceae, Polyporales, Agaricomycetes, Basidiomycota		CMPG 1229	SEIGLE-MURANDI Françoise				Wood-saprotroph WR			ITS sequencing	ITS-BRFM 543
544	Ceriporiopsis subvermispora	Ceriporiopsis subvermispora (Pilát) Gilb. & Ryvarden	Meruliaceae, Polyporales, Agaricomycetes, Basidiomycota	FP-90031-SP	CMPG 1230	SEIGLE-MURANDI Françoise				Wood-saprotroph WR	Quercus sp. logs	Beltsville, Maryland, USA	ITS sequencing	ITS-BRFM 544
545	Ceriporiopsis subvermispora	Ceriporiopsis subvermispora (Pilát) Gilb. & Ryvarden	Meruliaceae, Polyporales, Agaricomycetes, Basidiomycota		CMPG 1231	SEIGLE-MURANDI Françoise				Wood-saprotroph WR			ITS sequencing	ITS-BRFM 545
547	Ceriporiopsis subvermispora	Ceriporiopsis subvermispora (Pilát) Gilb. & Ryvarden	Meruliaceae, Polyporales, Agaricomycetes, Basidiomycota	CZ-3	CMPG 1233	SEIGLE-MURANDI Françoise				Wood-saprotroph WR	Western hemlock wood chips	Port Townsend, Washington, USA	ITS sequencing	ITS-BRFM 547
548	Ceriporiopsis subvermispora	Ceriporiopsis subvermispora (Pilát) Gilb. & Ryvarden	Meruliaceae, Polyporales, Agaricomycetes, Basidiomycota	L-3292-SP	CMPG 1234	SEIGLE-MURANDI Françoise				Wood-saprotroph WR		USA	ITS sequencing	ITS-BRFM 548
549	Gloeoporus dichrous	Gloeoporus dichrous (Fr.) Bres.	Meruliaceae, Polyporales, Agaricomycetes, Basidiomycota		CMPG 1251	SEIGLE-MURANDI Françoise				Wood-saprotroph WR	fruitbody growing on dead birch	Sweden	ITS sequencing	ITS-BRFM 549
551	Phlebiopsis gigantea	Phlebiopsis gigantea (Fr.) Jülich	Phanerochaetaceae, Polyporales, Agaricomycetes, Basidiomycota		CMPG 1253	SEIGLE-MURANDI Françoise				Wood-saprotroph WR		Sweden	ITS sequencing	ITS-BRFM 551
552	Phanerochaete velutina	Phanerochaete velutina (DC.) P. Karst.	Phanerochaetaceae, Polyporales, Agaricomycetes, Basidiomycota		CMPG 1254	SEIGLE-MURANDI Françoise				Wood-saprotroph WR	fruitbody growing on pine	Sweden	ITS sequencing	ITS-BRFM 552
553	Phlebia radiata	Phlebia radiata Fr.	Meruliaceae, Polyporales, Agaricomycetes, Basidiomycota		CMPG 1255	SEIGLE-MURANDI Françoise				Wood-saprotroph WR		Sweden	ITS sequencing	ITS-BRFM 553
554	Pycnoporus cinnabarinus	Pycnoporus cinnabarinus (Jacq.) P. Karst.	Polyporaceae, Polyporales, Agaricomycetes, Basidiomycota		CMPG 1256	SEIGLE-MURANDI Françoise				Wood-saprotroph WR		Sweden	ITS sequencing	ITS-BRFM 554
555	Trametes versicolor	Trametes versicolor (L.) Lloyd	Polyporaceae, Polyporales, Agaricomycetes, Basidiomycota		CMPG 1258	SEIGLE-MURANDI Françoise				Wood-saprotroph WR		Sweden	ITS sequencing	ITS-BRFM 555
558	Fomitopsis pinicola	Fomitopsis pinicola (Sw.) P. Karst.	Fomitopsidaceae, Polyporales, Agaricomycetes, Basidiomycota		CMPG 1261	SEIGLE-MURANDI Françoise				Wood-saprotroph BR	fruitbody growing on a pine stubb	Sweden	ITS sequencing	ITS-BRFM 558
560	Gloeophyllum sepiarium	Gloeophyllum sepiarium (Wulfen) P. Karst.	Gloeophyllaceae, Gloeophyllales, Agaricomycetes, Basidiomycota		CMPG 1263	SEIGLE-MURANDI Françoise				Wood-saprotroph BR		Sweden	ITS sequencing	ITS-BRFM 560
561	Leucogyrophana mollusca	Leucogyrophana mollusca (Fr.) Pouzar	Hygrophoropsidaceae, Boletales, Agaricomycetes, Basidiomycota		CMPG 1265	SEIGLE-MURANDI Françoise				Wood-saprotroph		Sweden	ITS sequencing	ITS-BRFM 561
565	Pleurotus ostreatus	Pleurotus ostreatus (Jacq.) P. Kumm.	Pleurotaceae, Agaricales, Agaricomycetes, Basidiomycota		CMPG 1285	SEIGLE-MURANDI Françoise				Wood-saprotroph WR		France	ITS sequencing	ITS-BRFM 565
568	Gymnopus peronatus	Gymnopus peronatus (Bolton) Gray	Omphalotaceae, Agaricales, Agaricomycetes, Basidiomycota		B2P2 656	VILLARD Jean		BOIDIN Jacques		Litter-saprotroph		France	ITS sequencing	ITS-BRFM 568
572	Pleurotus ostreatus	Pleurotus ostreatus (Jacq.) P. Kumm.	Pleurotaceae, Agaricales, Agaricomycetes, Basidiomycota		B2P2 1190	VILLARD Jean		BOIDIN Jacques		Wood-saprotroph WR		India	ITS sequencing	ITS-BRFM 572
575	Megacollybia platyphylla	Megacollybia platyphylla (Pers.) Kotl. & Pouzar	Marasmiaceae, Agaricales, Agaricomycetes, Basidiomycota		B2P2 168	VILLARD Jean		BOIDIN Jacques		Wood-saprotroph		France	ITS sequencing	ITS-BRFM 575
582	Pholiota gummosa	Pholiota gummosa (Lasch) Singer	Strophariaceae, Agaricales, Agaricomycetes, Basidiomycota		B2P2 1126	VILLARD Jean		BOIDIN Jacques		Wood-saprotroph		India	ITS sequencing	ITS-BRFM 582
583	Gymnopus peronatus	Gymnopus peronatus (Bolton) Gray	Omphalotaceae, Agaricales, Agaricomycetes, Basidiomycota		B2P2 993	VILLARD Jean		BOIDIN Jacques		Litter-saprotroph		France	ITS sequencing	ITS-BRFM 583
588	Mycena sanguinolenta	Mycena sanguinolenta (Alb. & Schwein.) P. Kumm.	Mycenaceae, Agaricales, Agaricomycetes, Basidiomycota		B2P2 1184	VILLARD Jean		BOIDIN Jacques		Wood-saprotroph		India	ITS sequencing	ITS-BRFM 590
593	Phyllotopsis nidulans	Phyllotopsis nidulans (Pers.) Singer	Tricholomataceae, Agaricales, Agaricomycetes, Basidiomycota		B2P2 1189	VILLARD Jean		BOIDIN Jacques		Wood-saprotroph WR		India	ITS sequencing	ITS-BRFM 593
600	Agaricus xanthodermus	Agaricus xanthodermus Genev.	Agaricaceae, Agaricales, Agaricomycetes, Basidiomycota		B2P2 1045	VILLARD Jean		BOIDIN Jacques		Litter-saprotroph	wood	France	ITS sequencing	ITS-BRFM 600
614	Schizophyllum sp.	Schizophyllum Fr.	Schizophyllaceae, Agaricales, Agaricomycetes, Basidiomycota		MNHN X03.4612	DUPONT Joëlle				Wood-saprotroph WR		Madagascar	ITS sequencing	ITS-BRFM 614
619	Microporus sp.	Microporus P. Beauv.	Polyporaceae, Polyporales, Agaricomycetes, Basidiomycota		MNHN x	DUPONT Joëlle				Wood-saprotroph		Madagascar
624	Trichaptum biforme	Trichaptum biforme (Fr.) Ryvarden	Polyporaceae, Polyporales, Agaricomycetes, Basidiomycota		B2P2 D576	VILLARD Jean		DAVID Alix		Wood-saprotroph WR		France	ITS sequencing	ITS-BRFM 624
626	Gloeoporus pannocinctus	Gloeoporus pannocinctus (Romell) J. Erikss.	Meruliaceae, Polyporales, Agaricomycetes, Basidiomycota		B2P2 D678	VILLARD Jean		DAVID Alix		Wood-saprotroph WR		France	ITS sequencing	ITS-BRFM 626
627	Spongipellis unicolor	Spongipellis unicolor (Fr.) Murrill	Polyporaceae, Polyporales, Agaricomycetes, Basidiomycota		B2P2 D708	VILLARD Jean		DAVID Alix		Plant-pathogen		France	ITS sequencing	ITS-BRFM 627
628	Polyporus arcularius	Polyporus arcularius (Batsch) Fr.	Polyporaceae, Polyporales, Agaricomycetes, Basidiomycota		B2P2 D726	VILLARD Jean		DAVID Alix		Wood-saprotroph WR		France	ITS sequencing	ITS-BRFM 628
629	Poria sp.	Poria P. Browne	Polyporaceae, Polyporales, Agaricomycetes, Basidiomycota		B2P2 D741	VILLARD Jean		DAVID Alix		Wood-saprotroph		France	ITS sequencing	ITS-BRFM 629
631	Ceriporiopsis gilvescens	Ceriporiopsis gilvescens (Bres.) Domanski	Meruliaceae, Polyporales, Agaricomycetes, Basidiomycota		B2P2 D781	VILLARD Jean		DAVID Alix		Wood-saprotroph WR		France	ITS sequencing	ITS-BRFM 631
632	Trametes ochracea	Trametes ochracea (Pers.) Gilb. & Ryvarden	Polyporaceae, Polyporales, Agaricomycetes, Basidiomycota		B2P2 D797	VILLARD Jean		DAVID Alix		Wood-saprotroph WR		France	ITS sequencing	ITS-BRFM 632
633	Ceriporiopsis rivulosa	Ceriporiopsis rivulosa (Berk. & M.A. Curtis) Gilb. & Ryvarden	Meripilaceae, Polyporales, Agaricomycetes, Basidiomycota		B2P2 D803	VILLARD Jean		DAVID Alix		Wood-saprotroph WR		France	ITS sequencing	ITS-BRFM 633
634	Postia sericeomollis	Postia sericeomollis (Romell) Jülich	Fomitopsidaceae, Polyporales, Agaricomycetes, Basidiomycota		B2P2 D823	VILLARD Jean		DAVID Alix		Wood-saprotroph BR		France	ITS sequencing	ITS-BRFM 634
635	Polyporus meridionalis	Polyporus meridionalis (A. David) H. Jahn	Polyporaceae, Polyporales, Agaricomycetes, Basidiomycota		B2P2 D844	VILLARD Jean		DAVID Alix		Wood-saprotroph WR		France	ITS sequencing	ITS-BRFM 635
640	Polyporus sp.	Polyporus P. Micheli ex Adans.	Polyporaceae, Polyporales, Agaricomycetes, Basidiomycota		B2P2 D931	VILLARD Jean		DAVID Alix		Wood-saprotroph WR		France	ITS sequencing	ITS-BRFM 640
641	Tyromyces sp.	Tyromyces P. Karst.	Polyporaceae, Polyporales, Agaricomycetes, Basidiomycota		B2P2 D990	VILLARD Jean		DAVID Alix		Wood-saprotroph		France	ITS sequencing	ITS-BRFM 641
642	Spongipellis unicolor	Spongipellis unicolor (Fr.) Murrill	Polyporaceae, Polyporales, Agaricomycetes, Basidiomycota		B2P2 D696	VILLARD Jean		DAVID Alix		Plant-pathogen		France	ITS sequencing	ITS-BRFM 642
643	Skeletocutis sp.	Skeletocutis Kotlába & Pouzar	Polyporaceae, Polyporales, Agaricomycetes, Basidiomycota		B2P2 D3049	VILLARD Jean		DAVID Alix		Wood-saprotroph WR		France	ITS sequencing	ITS-BRFM 643
644	Ischnoderma sp.	Ischnoderma P. Karst.	Fomitopsidaceae, Polyporales, Agaricomycetes, Basidiomycota		B2P2 D3062	VILLARD Jean		DAVID Alix		Wood-saprotroph WR		France	ITS sequencing	ITS-BRFM 644
645	Spongipellis litschaueri	Spongipellis litschaueri Lohwag	Polyporaceae, Polyporales, Agaricomycetes, Basidiomycota		CIRAD 349	ZAREMSKI Alba			ZAREMSKY Alba	Wood-saprotroph			ITS sequencing	ITS-BRFM 645
648	Postia balsamea	Postia balsamea (Peck) Jülich	Fomitopsidaceae, Polyporales, Agaricomycetes, Basidiomycota		B2P2 D3051	VILLARD Jean		DAVID Alix		Wood-saprotroph BR		France	ITS sequencing	ITS-BRFM 648
649	Polyporus ciliatus	Polyporus ciliatus Fr.	Polyporaceae, Polyporales, Agaricomycetes, Basidiomycota		B2P2 D879	VILLARD Jean		DAVID Alix		Wood-saprotroph WR		France	ITS sequencing	ITS-BRFM 649
650	Polyporus arcularius	Polyporus arcularius (Batsch) Fr.	Polyporaceae, Polyporales, Agaricomycetes, Basidiomycota		B2P2 D892	VILLARD Jean		DAVID Alix		Wood-saprotroph WR		France	ITS sequencing	ITS-BRFM 650
653	Strobilurus esculentus	Strobilurus esculentus (Wulfen) Singer	Physalacriaceae, Agaricales, Agaricomycetes, Basidiomycota		B2P2 609	VILLARD Jean		BOIDIN Jacques		Litter-saprotroph		France	ITS sequencing	ITS-BRFM 653
654	Gymnopus fusipes	Gymnopus fusipes (Bull.) Gray	Omphalotaceae, Agaricales, Agaricomycetes, Basidiomycota		B2P2 1233	VILLARD Jean		BOIDIN Jacques		Wood-saprotroph		France	ITS sequencing	ITS-BRFM 654
655	Agaricus xanthodermus	Agaricus xanthodermus Genev.	Agaricaceae, Agaricales, Agaricomycetes, Basidiomycota		B2P2 1193	VILLARD Jean		BOIDIN Jacques		Litter-saprotroph		France	ITS sequencing	ITS-BRFM 655
656	Gymnopus erythropus	Gymnopus erythropus (Pers.) Antonín	Omphalotaceae, Agaricales, Agaricomycetes, Basidiomycota		B2P2 654	VILLARD Jean		BOIDIN Jacques		Wood-saprotroph		France	ITS sequencing	ITS-BRFM 656
657	Agaricus xanthodermus	Agaricus xanthodermus Genev.	Agaricaceae, Agaricales, Agaricomycetes, Basidiomycota		B2P2 672	VILLARD Jean		BOIDIN Jacques		Litter-saprotroph		France	ITS sequencing	ITS-BRFM 657
658	Panaeolus sphinctrinus	Panaeolus sphinctrinus (Fr.) Quél.	Strophariaceae, Agaricales, Agaricomycetes, Basidiomycota		B2P2 687	VILLARD Jean		BOIDIN Jacques		Coprophilous		France	ITS sequencing	ITS-BRFM 658
661	Marasmiellus ramealis	Marasmiellus ramealis (Bull.) Singer	Omphalotaceae, Agaricales, Agaricomycetes, Basidiomycota		B2P2 934	VILLARD Jean		BOIDIN Jacques		Wood-saprotroph		France	ITS sequencing	ITS-BRFM 661
662	Ceriporiopsis rivulosa	Ceriporiopsis rivulosa (Berk. & M.A. Curtis) Gilb. & Ryvarden	Meruliaceae, Polyporales, Agaricomycetes, Basidiomycota		B2P2 D839	VILLARD Jean		DAVID Alix		Wood-saprotroph WR		France	ITS sequencing	ITS-BRFM 662
663	Ceriporiopsis rivulosa	Ceriporiopsis rivulosa (Berk. & M.A. Curtis) Gilb. & Ryvarden	Meruliaceae, Polyporales, Agaricomycetes, Basidiomycota		B2P2 D838	VILLARD Jean		DAVID Alix		Wood-saprotroph WR		France	ITS sequencing	ITS-BRFM 663
664	Aurantiporus fissilis	Aurantiporus fissilis (Berk. & M.A. Curtis) H. Jahn ex Ryvarden…	Polyporaceae, Polyporales, Agaricomycetes, Basidiomycota		B2P2 D763	VILLARD Jean		DAVID Alix		Wood-saprotroph		France	ITS sequencing	ITS-BRFM 664
665	Fomitopsis spraguei	Fomitopsis spraguei (Berk. & M.A. Curtis) Gilb. & Ryvarden	Fomitopsidaceae, Polyporales, Agaricomycetes, Basidiomycota		B2P2 D933	VILLARD Jean		DAVID Alix		Wood-saprotroph BR		France	ITS sequencing	ITS-BRFM 665
666	Radulodon casearius	Radulodon casearius (Morgan) Ryvarden	Meruliaceae, Polyporales, Agaricomycetes, Basidiomycota		B2P2 Bo3056	VILLARD Jean		BOIDIN Jacques		Wood-saprotroph		France
668	Lentinellus castoreus	Lentinellus castoreus (Fr.) Kühner & Maire	Auriscalpiaceae, Russulales, Agaricomycetes, Basidiomycota		B2P2 K146	VILLARD Jean		KÜHNER Robert		Wood-saprotroph WR		France	ITS sequencing	ITS-BRFM 668
669	Rhodocollybia butyracea	Rhodocollybia butyracea (Bull.) Lennox	Omphalotaceae, Agaricales, Agaricomycetes, Basidiomycota		B2P2 972	VILLARD Jean		BOIDIN Jacques		Litter-saprotroph		France	ITS sequencing	ITS-BRFM 669
671	Marasmius oreades	Marasmius oreades (Bolton) Fr.	Marasmiaceae, Agaricales, Agaricomycetes, Basidiomycota		B2P2 1047	VILLARD Jean		BOIDIN Jacques		Litter-saprotroph		France	ITS sequencing	ITS-BRFM 671
674	Pholiota conissans	Pholiota conissans (Fr.) Kuyper & Tjall.-Beuk.	Strophariaceae, Agaricales, Agaricomycetes, Basidiomycota		B2P2 K163	VILLARD Jean		KÜHNER Robert		Wood-saprotroph WR		France	ITS sequencing	ITS-BRFM 674
678	Oxyporus latemarginatus	Oxyporus latemarginatus (Durieu & Mont.) Donk	Schizoporaceae, Hymenochaetales, Agaricomycetes, Basidiomycota		CIRAD 365	ZAREMSKI Alba			ZAREMSKY Alba	Wood-saprotroph WR			ITS sequencing	ITS-BRFM 678
681	Tyromyces sp.	Tyromyces P. Karst.	Polyporaceae, Polyporales, Agaricomycetes, Basidiomycota		B2P2 D3022	VILLARD Jean		DAVID Alix		Wood-saprotroph		France	ITS sequencing	ITS-BRFM 681
684	Lentinula edodes	Lentinula edodes (Berk.) Pegler	Omphalotaceae, Agaricales, Agaricomycetes, Basidiomycota	CBS 532.90						Wood-saprotroph WR		Japan	ITS sequencing	ITS-BRFM 684
687	Gloeophyllum odoratum	Gloeophyllum odoratum (Wulfen) Imazeki	Gloeophyllaceae, Gloeophyllales, Agaricomycetes, Basidiomycota		CIRAD 590	ZAREMSKI Alba			ZAREMSKY Alba	Wood-saprotroph BR		France
690	Xylobolus princeps	Xylobolus princeps (Jungh.) Boidin	Stereaceae, Russulales, Agaricomycetes, Basidiomycota		B2P2 Bo4393	VILLARD Jean		BOIDIN Jacques		Wood-saprotroph		France	ITS sequencing	ITS-BRFM 690
691	Stereum complicatum	Stereum complicatum (Fr.) Fr.	Stereaceae, Russulales, Agaricomycetes, Basidiomycota		B2P2 Bo3850	VILLARD Jean		BOIDIN Jacques		Wood-saprotroph WR		France	ITS sequencing	ITS-BRFM 691
693	Panellus stipticus	Panellus stipticus (Bull.) P. Karst.	Mycenaceae, Agaricales, Agaricomycetes, Basidiomycota		B2P2 K83	VILLARD Jean		KÜHNER Robert		Wood-saprotroph WR		France	ITS sequencing	ITS-BRFM 693
697	Skeletocutis lenis	Skeletocutis lenis (P. Karst.) Niemelä	Polyporaceae, Polyporales, Agaricomycetes, Basidiomycota		B2P2 D765	VILLARD Jean		DAVID Alix		Wood-saprotroph WR		France	ITS sequencing	ITS-BRFM 697
699	Pleurotus pulmonarius	Pleurotus pulmonarius (Fr.) Quél.	Pleurotaceae, Agaricales, Agaricomycetes, Basidiomycota	CBS 507.85						Wood-saprotroph WR	Fagus sylvatica (Fagaceae)	Netherlands	ITS sequencing	ITS-BRFM 699
708	Galerina sideroides	Galerina sideroides (Bull.) Kühner	Strophariaceae, Agaricales, Agaricomycetes, Basidiomycota		B2P2 226	VILLARD Jean		BOIDIN Jacques		Wood-saprotroph		France	ITS sequencing	ITS-BRFM 708
709	Hyphoderma setigerum	Hyphoderma setigerum (Fr.) Donk	Meruliaceae, Polyporales, Agaricomycetes, Basidiomycota		B2P2 Bo4522	VILLARD Jean		BOIDIN Jacques		Wood-saprotroph WR		France	ITS sequencing	ITS-BRFM 709
712	Mycena polygramma	Mycena polygramma (Bull.) Gray	Mycenaceae, Agaricales, Agaricomycetes, Basidiomycota		B2P2 546	VILLARD Jean		BOIDIN Jacques		Wood-saprotroph		France	ITS sequencing	ITS-BRFM 712
713	Mycena zephirus	Mycena zephirus (Fr.) P. Kumm.	Mycenaceae, Agaricales, Agaricomycetes, Basidiomycota		B2P2 550	VILLARD Jean		BOIDIN Jacques		Wood-saprotroph		France	ITS sequencing	ITS-BRFM 713
714	Panaeolus fimicola	Panaeolus fimicola (Fr.) Quél.	Strophariaceae, Agaricales, Agaricomycetes, Basidiomycota		B2P2 556	VILLARD Jean		BOIDIN Jacques		Coprophilous		France	ITS sequencing	ITS-BRFM 714
715	Panaeolus sphinctrinus	Panaeolus sphinctrinus (Fr.) Quél.	Strophariaceae, Agaricales, Agaricomycetes, Basidiomycota		B2P2 558	VILLARD Jean		BOIDIN Jacques		Coprophilous		France	ITS sequencing	ITS-BRFM 715
738	Xerula longipes	Xerula longipes (Quél.) Maire	Physalacriaceae, Agaricales, Agaricomycetes, Basidiomycota		B2P2 1109	VILLARD Jean		BOIDIN Jacques		Litter-saprotroph		France	ITS sequencing	ITS-BRFM 738
744	Perenniporia subacida	Perenniporia subacida (Peck) Donk	Polyporaceae, Polyporales, Agaricomycetes, Basidiomycota		CIRAD 549	ZAREMSKI Alba			ZAREMSKY Alba	Wood-saprotroph WR		France	ITS sequencing	ITS-BRFM 744
745	Lentinus tigrinus	Lentinus tigrinus (Bull.) Fr.	Polyporaceae, Polyporales, Agaricomycetes, Basidiomycota		B2P2 1240	VILLARD Jean		BOIDIN Jacques		Wood-saprotroph WR		France	ITS sequencing	ITS-BRFM 745
748	Mycena galericulata	Mycena galericulata (Scop.) Gray	Mycenaceae, Agaricales, Agaricomycetes, Basidiomycota		B2P2 1216	VILLARD Jean		BOIDIN Jacques		Wood-saprotroph		France	ITS sequencing	ITS-BRFM 748
749	Perenniporia fraxinea	Perenniporia fraxinea (Bull.) Ryvarden	Polyporaceae, Polyporales, Agaricomycetes, Basidiomycota		CIRAD 190	ZAREMSKI Alba			ZAREMSKY Alba	Wood-saprotroph WR		France	ITS sequencing	ITS-BRFM 749
750	Perenniporia subacida	Perenniporia subacida (Peck) Donk	Polyporaceae, Polyporales, Agaricomycetes, Basidiomycota		CIRAD 985	ZAREMSKI Alba			ZAREMSKY Alba	Wood-saprotroph WR	wood	French Guiana	ITS sequencing	ITS-BRFM 750
752	Trametes versicolor	Trametes versicolor (L.) Lloyd	Polyporaceae, Polyporales, Agaricomycetes, Basidiomycota		ATCC 32745	ZAREMSKI Alba			ZAREMSKY Alba	Wood-saprotroph WR	decayed wood	New York, USA	ITS sequencing	ITS-BRFM 752
753	Ganoderma resinaceum	Ganoderma resinaceum Boud.	Ganodermataceae, Polyporales, Agaricomycetes, Basidiomycota		CIRAD 4143	ZAREMSKI Alba			ZAREMSKY Alba	Wood-saprotroph WR		France	ITS sequencing	ITS-BRFM 753
754	Ganoderma resinaceum	Ganoderma resinaceum Boud.	Ganodermataceae, Polyporales, Agaricomycetes, Basidiomycota		CIRAD 4351	ZAREMSKI Alba			ZAREMSKY Alba	Wood-saprotroph WR		France	ITS sequencing	ITS-BRFM 754
755	Ganoderma resinaceum	Ganoderma resinaceum Boud.	Ganodermataceae, Polyporales, Agaricomycetes, Basidiomycota		CIRAD 4361	ZAREMSKI Alba			ZAREMSKY Alba	Wood-saprotroph WR		France	ITS sequencing	ITS-BRFM 755
758	Abortiporus biennis	Abortiporus biennis (Bull.) Singer	Meruliaceae, Polyporales, Agaricomycetes, Basidiomycota		CIRAD 4354	ZAREMSKI Alba			ZAREMSKY Alba	Plant-pathogen WR		France	ITS sequencing	ITS-BRFM 758
759	Meripilus giganteus	Meripilus giganteus (Pers.) P. Karst.	Meripilaceae, Polyporales, Agaricomycetes, Basidiomycota		CIRAD 4357	ZAREMSKI Alba			ZAREMSKY Alba	Wood-saprotroph WR		France	ITS sequencing	ITS-BRFM 759
763	Stereum rugosum	Stereum rugosum Pers.	Stereaceae, Russulales, Agaricomycetes, Basidiomycota		CIRAD 3837	ZAREMSKI Alba			ZAREMSKY Alba	Wood-saprotroph WR		France	ITS sequencing	ITS-BRFM 763
768	Xylobolus frustulatus	Xylobolus frustulatus (Pers.) Boidin	Stereaceae, Russulales, Agaricomycetes, Basidiomycota		B2P2 Bo4420	VILLARD Jean		BOIDIN Jacques		Wood-saprotroph		France	ITS sequencing	ITS-BRFM 768
788	Peniophora albobadia	Peniophora albobadia (Schwein.) Boidin	Peniophoraceae, Russulales, Agaricomycetes, Basidiomycota		B2P2 Bo5683	VILLARD Jean		BOIDIN Jacques		Wood-saprotroph		France	ITS sequencing	ITS-BRFM 788
793	Crustomyces subabruptus	Crustomyces subabruptus (Bourdot & Galzin) Jülich	Cystostereaceae, Polyporales, Agaricomycetes, Basidiomycota		B2P2 Bo4895	VILLARD Jean		BOIDIN Jacques		Wood-saprotroph		France
803	Sistotrema coroniferum	Sistotrema coroniferum (Höhn. & Litsch.) D.P. Rogers & H.S.	Hydnaceae, Cantharellales, Agaricomycetes, Basidiomycota		B2P2 Bo4097	VILLARD Jean		BOIDIN Jacques		Wood-saprotroph		France	ITS sequencing	ITS-BRFM 803
807	Hericium coralloides	Hericium coralloides (Scop.) Pers.	Hericiaceae, Russulales, Agaricomycetes, Basidiomycota		B2P2 Bo2443	VILLARD Jean		BOIDIN Jacques		Wood-saprotroph WR		France	ITS sequencing	ITS-BRFM 807
827	Aspergillus awamori	Aspergillus awamori Nakaz.	Aspergillaceae, Eurotiales, Eurotiomycetes, Ascomycota		CMPG 1471	SEIGLE-MURANDI Françoise				Saprotroph SR		Germany	ITS sequencing	ITS-BRFM 827
845	Lepista nuda	Lepista nuda (Bull.) Cooke	Tricholomataceae, Agaricales, Agaricomycetes, Basidiomycota		GUIMB 06-09	GUIMBERTEAU Jacques			GUIMBERTEAU Jacques (MycSA)	Litter-saprotroph	hybrid strain (laboratory)		ITS sequencing	ITS-BRFM 845
851	Macrolepiota fuliginosa	Macrolepiota fuliginosa (Barla) Bon	Agaricaceae, Agaricales, Agaricomycetes, Basidiomycota		GUIMB 06-13	GUIMBERTEAU Jacques			GUIMBERTEAU Jacques (MycSA)	Litter-saprotroph	fallows, St Selve	Aquitaine, Saint-Selve, France	ITS sequencing	ITS-BRFM 851
853	Pleurotus ostreatus	Pleurotus ostreatus (Jacq.) P. Kumm.	Pleurotaceae, Agaricales, Agaricomycetes, Basidiomycota		MYCSA St Selve 101203	GUIMBERTEAU Jacques			GUIMBERTEAU Jacques (MycSA)	Wood-saprotroph WR	leafy trunk, St Selve	Aquitaine, Saint-Selve, France	ITS sequencing	ITS-BRFM 853
857	Agaricus bisporus	Agaricus bisporus (J.E. Lange) Imbach	Agaricaceae, Agaricales, Agaricomycetes, Basidiomycota		MYCSA Bs 697	GUIMBERTEAU Jacques			GUIMBERTEAU Jacques (MycSA)	Litter-saprotroph		France	ITS sequencing	ITS-BRFM 857
870	Fibroporia vaillantii	Fibroporia vaillantii (DC.) Parmasto	Polyporaceae, Polyporales, Agaricomycetes, Basidiomycota		CIRAD 3653	ZAREMSKI Alba			ZAREMSKY Alba	Wood-saprotroph BR		France	ITS sequencing	ITS-BRFM 870
875	Ganoderma resinaceum	Ganoderma resinaceum Boud.	Ganodermataceae, Polyporales, Agaricomycetes, Basidiomycota			HAON Mireille	MRS27	HAON Mireille	HAON Mireille	Wood-saprotroph WR	Plane tree, fruitbody growing on dead tree, Marseille	Bouches du Rhone, Marseille, France	ITS sequencing	ITS-BRFM 875
886	Fomitopsis pinicola	Fomitopsis pinicola (Sw.) P. Karst.	Fomitopsidaceae, Polyporales, Agaricomycetes, Basidiomycota			FAVEL Anne	BAU35	NAVARRO David	NAVARRO David	Wood-saprotroph BR	Tree, forest, Ste Baume	Var, Plan d'Aups, France	ITS sequencing	ITS-BRFM 886
895	Pycnoporus sanguineus	Pycnoporus sanguineus (L.) Murrill	Polyporaceae, Polyporales, Agaricomycetes, Basidiomycota			FAVEL Anne	GUY41	NAVARRO David	NAVARRO David	Wood-saprotroph WR	dead wood, dead wood, Paracou	Paracou, French Guiana	ITS sequencing	ITS-BRFM 895
902	Pycnoporus sanguineus	Pycnoporus sanguineus (L.) Murrill	Polyporaceae, Polyporales, Agaricomycetes, Basidiomycota			FAVEL Anne	GUY110	NAVARRO David	NAVARRO David	Wood-saprotroph WR	Burnt wood, burnt wood, Macouria	Macouria, French Guiana	ITS sequencing	ITS-BRFM 902
920	Earliella scabrosa	Earliella scabrosa (Pers.) Gilb. & Ryvarden	Polyporaceae, Polyporales, Agaricomycetes, Basidiomycota			FAVEL Anne	GUY 26	NAVARRO David	NAVARRO David	Wood-saprotroph WR	Tropical forest	French Guiana	ITS sequencing	ITS-BRFM 920
938	Pycnoporus coccineus	Pycnoporus coccineus (Fr.) Bondartsev & Singer	Polyporaceae, Polyporales, Agaricomycetes, Basidiomycota	MUCL 38523		FAVEL Anne				Wood-saprotroph WR	ironbark pole, Eucalyptus sp	Australia	ITS sequencing	ITS-BRFM 938
952	Trametes gibbosa	Trametes gibbosa (Pers.) Fr.	Polyporaceae, Polyporales, Agaricomycetes, Basidiomycota			FAVEL Anne	MOU 147	NAVARRO David	NAVARRO David	Wood-saprotroph WR	wood, Beechs forest	Gironde, Moulis, France	ITS sequencing	ITS-BRFM 952
957	Trametes ljubarskyi	Trametes ljubarskyi Pilát	Polyporaceae, Polyporales, Agaricomycetes, Basidiomycota			FAVEL Anne	MOU139	NAVARRO David	NAVARRO David	Wood-saprotroph WR	wood, Cherry tree	Gironde, Moulis, France	ITS sequencing	ITS-BRFM 957
965	Bjerkandera adusta	Bjerkandera adusta (Willd.) P. Karst.	Meruliaceae, Polyporales, Agaricomycetes, Basidiomycota			FAVEL Anne	BEL 160	FAVEL Anne	NAVARRO David	Wood-saprotroph WR	Forest	Orne, Bellême, France	ITS sequencing	ITS-BRFM 965
966	Panellus stipticus	Panellus stipticus (Bull.) P. Karst.	Mycenaceae, Agaricales, Agaricomycetes, Basidiomycota			FAVEL Anne	BEL 159	FAVEL Anne	NAVARRO David	Wood-saprotroph WR	Forest	Orne, Bellême, France	ITS sequencing	ITS-BRFM 966
967	Piptoporus betulinus	Piptoporus betulinus (Bull.) P. Karst.	Fomitopsidaceae, Polyporales, Agaricomycetes, Basidiomycota			FAVEL Anne	BEL161	FAVEL Anne	NAVARRO David	Wood-saprotroph BR	Forest	Orne, Bellême, France	ITS sequencing	ITS-BRFM 967
969	Gymnopilus junonius	Gymnopilus junonius (Fr.) P.D. Orton	Strophariaceae, Agaricales, Agaricomycetes, Basidiomycota			FAVEL Anne	BEL 164	FAVEL Anne	NAVARRO David	Wood-saprotroph WR	Forest	Orne, Bellême, France	ITS sequencing	ITS-BRFM 969
977	Podospora anserina	Podospora anserina (Rabenh.) Niessl	Lasiosphaeriaceae, Sordariales, Sordariomycetes, Ascomycota	CBS 141520	Pa smat-	SILAR Philippe				Coprophilous	Dung	Normandie, France	ITS sequencing	ITS-BRFM 977
980	Pycnoporus sanguineus	Pycnoporus sanguineus (L.) Murrill	Polyporaceae, Polyporales, Agaricomycetes, Basidiomycota			DUCOUSSO Marc	CAL 187B	DUCOUSSO Marc	DUCOUSSO Marc	Wood-saprotroph WR	wood	New Caledonia, New Caledonia	ITS sequencing	ITS-BRFM 980
985	Polyporus brumalis	Polyporus brumalis (Pers.) Fr.	Polyporaceae, Polyporales, Agaricomycetes, Basidiomycota			CAZENAVE Robert	TAR 08-1	CAZENAVE Robert	CAZENAVE Robert	Wood-saprotroph WR		Hautes-Pyrénées, Tarbes, France	ITS sequencing	ITS-BRFM 985
1008	Laccaria bicolor	Laccaria bicolor (Maire) P.D. Orton	Hydnangiaceae, Agaricales, Agaricomycetes, Basidiomycota		S238N	MARTIN Francis (UMR IAM)				Ectomycorrhizal	Crater Lake National Park (Oregon, USA)	Oregon, USA	ITS sequencing	ITS-BRFM 1008
1009	Eutypa caribensis		Diatrypaceae, Xylariales, Sordariomycetes, Ascomycota		CLL 7374	LECHAT Christian		LECHAT Christian	LECHAT Christian	Wood-saprotroph		Martinique	ITS sequencing	ITS-BRFM 1009
1010	Eutypa caribensis		Diatrypaceae, Xylariales, Sordariomycetes, Ascomycota		CLL 7366	LECHAT Christian		LECHAT Christian	LECHAT Christian	Wood-saprotroph		Martinique	ITS sequencing	ITS-BRFM 1010
1011	Eutypa caribensis		Diatrypaceae, Xylariales, Sordariomycetes, Ascomycota		CLL 7367	LECHAT Christian		LECHAT Christian	LECHAT Christian	Wood-saprotroph		Martinique	ITS sequencing	ITS-BRFM 1011
1012	Eutypella scoparia	Eutypella scoparia (Schwein.) Ellis & Everh.	Diatrypaceae, Xylariales, Sordariomycetes, Ascomycota		CLL 7370	LECHAT Christian		LECHAT Christian	LECHAT Christian	Wood-saprotroph		Martinique	ITS sequencing	ITS-BRFM 1012
1014	Eutypella scoparia	Eutypella scoparia (Schwein.) Ellis & Everh.	Diatrypaceae, Xylariales, Sordariomycetes, Ascomycota		CLL 7354	LECHAT Christian		LECHAT Christian	LECHAT Christian	Wood-saprotroph		Martinique	ITS sequencing	ITS-BRFM 1014
1017	Nectria pseudotrichia	Nectria pseudotrichia Berk. & M.A. Curtis	Nectriaceae, Hypocreales, Sordariomycetes, Ascomycota		CLL 7274	LECHAT Christian		LECHAT Christian	LECHAT Christian	Not determined		Martinique	ITS sequencing	ITS-BRFM 1017
1026	Ganoderma subfornicatum	Ganoderma subfornicatum Murrill	Ganodermataceae, Polyporales, Agaricomycetes, Basidiomycota			FAVEL Anne	GUY 08-104	NAVARRO David	FAVEL Anne	Wood-saprotroph WR	Forest	Saùl, French Guiana	ITS sequencing	ITS-BRFM 1026
1030	Ganoderma sp.	Ganoderma P. Karst.	Ganodermataceae, Polyporales, Agaricomycetes, Basidiomycota			GRISEL Sacha	GUY 08-48	GRISEL Sacha	GRISEL Sacha	Wood-saprotroph WR	Forest	Sinnamary, French Guiana	ITS sequencing	ITS-BRFM 1030
1037	Fomes fasciatus	Fomes fasciatus (Sw.) Cooke	Polyporaceae, Polyporales, Agaricomycetes, Basidiomycota			FAVEL Anne	GUY 08-124	NAVARRO David	FAVEL Anne	Wood-saprotroph WR	Forest	Saùl, French Guiana	ITS sequencing	ITS-BRFM 1037
1043	Ganoderma weberianum	Ganoderma weberianum (Bres. & Henn. ex Sacc.) Steyaert	Ganodermataceae, Polyporales, Agaricomycetes, Basidiomycota			FAVEL Anne	GUY 08-175	NAVARRO David	FAVEL Anne	Wood-saprotroph WR	Garden	Kourou, French Guiana	ITS sequencing	ITS-BRFM 1043
1046	Grammothele fuligo	Grammothele fuligo (Berk. & Broome) Ryvarden	Polyporaceae, Polyporales, Agaricomycetes, Basidiomycota			FAVEL Anne	GUY 08-25	COURTECUISSE Régis	FAVEL Anne	Wood-saprotroph WR	leafstalk of palm, Forest	Kourou, French Guiana	ITS sequencing	ITS-BRFM 1046
1048	Leiotrametes sp.	Leiotrametes Welti & Courtec.	Polyporaceae, Polyporales, Agaricomycetes, Basidiomycota			GRISEL Sacha	GUY 08-17	GRISEL Sacha	GRISEL Sacha	Wood-saprotroph WR	Forest	Kourou, French Guiana	ITS sequencing	ITS-BRFM 1048
1054	Leiotrametes sp.	Leiotrametes Welti & Courtec.	Polyporaceae, Polyporales, Agaricomycetes, Basidiomycota			GRISEL Sacha	GUY 08-146	GRISEL Sacha	GRISEL Sacha	Wood-saprotroph WR	Forest	Saùl, French Guiana	ITS sequencing	ITS-BRFM 1054
1055	Lenzites acuta	Lenzites acuta Berk. (1842)	Polyporaceae, Polyporales, Agaricomycetes, Basidiomycota			GRISEL Sacha	GUY 08-147	GRISEL Sacha	GRISEL Sacha	Wood-saprotroph WR	Forest	Saùl, French Guiana	ITS sequencing	ITS-BRFM 1055
1062	Fomitopsis rosea	Fomitopsis rosea (Alb. & Schwein.) P. Karst.	Fomitopsidaceae, Polyporales, Agaricomycetes, Basidiomycota		HBRi 3395	RIVOIRE Bernard		RIVOIRE Bernard	RIVOIRE Bernard	Wood-saprotroph BR	Wood : Picea abies	France	ITS sequencing	ITS-BRFM 1062
1077	Tinctoporellus epimiltinus	Tinctoporellus epimiltinus (Berk. & Broome) Ryvarden	Polyporaceae, Polyporales, Agaricomycetes, Basidiomycota			FAVEL Anne	GUY 08-26	COURTECUISSE Régis	FAVEL Anne	Wood-saprotroph WR	branch, Monkey Mountain	Kourou, French Guiana	ITS sequencing	ITS-BRFM 1077
1095	Rhizopus oryzae	Rhizopus arrhizus var. arrhizus (1892)	Mucoraceae, Mucorales, Mucuromycetes, Mucuromycota	FGSC 9543, RA 99-880		FAVEL Anne				Not determined			ITS sequencing	ITS-BRFM 1095
1104	Trichoderma reesei	Trichoderma reesei E.G. Simmons	Hypocreaceae, Hypocreales, Sordariomycetes, Ascomycota	CBS 383.78, QM6a		FAVEL Anne				Saprotroph SR	cotton duck shelter, Bougainville Island Solomon Islands		ITS sequencing	ITS-BRFM 1104
1106	Earliella scabrosa	Earliella scabrosa (Pers.) Gilb. & Ryvarden	Polyporaceae, Polyporales, Agaricomycetes, Basidiomycota			FAVEL Anne	GUY 08-137	NAVARRO David	FAVEL Anne	Wood-saprotroph WR	Fred home, garden-forest	Saùl, French Guiana	ITS sequencing	ITS-BRFM 1106
1122	Artolenzites elegans	Artolenzites elegans (Spreng.) Teixeira	Polyporaceae, Polyporales, Agaricomycetes, Basidiomycota			FAVEL Anne	GUY 08-145	NAVARRO David	FAVEL Anne	Wood-saprotroph WR	Top of village	Saùl, French Guiana	ITS sequencing	ITS-BRFM 1122
1123	Phlebia sp.	Phlebia Fr.	Meruliaceae, Polyporales, Agaricomycetes, Basidiomycota			FAVEL Anne	GUY 08-160	COURTECUISSE Régis	FAVEL Anne	Wood-saprotroph WR	Saut Leodat path, forest	Macouria, French Guiana	ITS sequencing	ITS-BRFM 1123
1126	Coriolopsis sp.	Coriolopsis Murrill	Polyporaceae, Polyporales, Agaricomycetes, Basidiomycota			GRISEL Sacha	GUY 08-201	GRISEL Sacha	GRISEL Sacha	Wood-saprotroph	Saut Leodat path, forest	Macouria, French Guiana	ITS sequencing	ITS-BRFM 1126
1148	Postia stiptica	Postia stiptica (Pers.) Jülich	Fomitopsidaceae, Polyporales, Agaricomycetes, Basidiomycota			FAVEL Anne	HYE 08-381	RIVOIRE Bernard	NAVARRO David	Wood-saprotroph BR	Hyères, Presqu ile de Giens, Tour fondue	Var, Hyères, France	ITS sequencing	ITS-BRFM 1148
1161	Ganoderma adspersum	Ganoderma adspersum (Schulzer) Donk	Ganodermataceae, Polyporales, Agaricomycetes, Basidiomycota			FAVEL Anne	POR 08-360	RIVOIRE Bernard	FAVEL Anne	Wood-saprotroph WR	Porquerolles, plage d argent	Var, Hyères, France	ITS sequencing	ITS-BRFM 1161
1162	Grifola frondosa	Grifola frondosa (Dicks.) Gray	Fomitopsidaceae, Polyporales, Agaricomycetes, Basidiomycota			FAVEL Anne	BEL 08-260	FAVEL Anne	NAVARRO David	Wood-saprotroph WR		Orne, Bellême, France	ITS sequencing	ITS-BRFM 1162
1187	Daedaleopsis confragosa	Daedaleopsis confragosa (Bolton) J. Schröt.	Polyporaceae, Polyporales, Agaricomycetes, Basidiomycota			FAVEL Anne	BEC 08-312	PRIOU Jean-Paul	NAVARRO David	Wood-saprotroph WR	Forest, bog, bois du Pinet, Roquefeuil	Aude, Belcaire, France	ITS sequencing	ITS-BRFM 1187
1190	Amauroderma calcigenum	Amauroderma calcigenum (Berk.) Torrend	Ganodermataceae, Polyporales, Agaricomycetes, Basidiomycota			GRISEL Sacha	GUY 08-150	GRISEL Sacha	GRISEL Sacha	Wood-saprotroph WR	Saut Leodat	Macouria, French Guiana	ITS sequencing	ITS-BRFM 1190
1192	Perenniporia ochroleuca	Perenniporia ochroleuca (Berk.) Ryvarden	Polyporaceae, Polyporales, Agaricomycetes, Basidiomycota			FAVEL Anne	HYE 08-345	NAVARRO David	NAVARRO David	Wood-saprotroph WR		Var, Hyères, France	ITS sequencing	ITS-BRFM 1192
1195	Omphalotus olearius	Omphalotus olearius (DC.) Singer	Omphalotaceae, Agaricales, Agaricomycetes, Basidiomycota			NAVARRO David	MAR 08-319	NAVARRO David	NAVARRO David	Wood-saprotroph	Olive tree, Garden of Polytech School	Bouches du Rhone, Marseille, France	ITS sequencing	ITS-BRFM 1195
1215	Abortiporus biennis	Abortiporus biennis (Bull.) Singer	Meruliaceae, Polyporales, Agaricomycetes, Basidiomycota			FAVEL Anne	BEL 08-259	FAVEL Anne	NAVARRO David	Plant-pathogen WR		Orne, Bellême, France	ITS sequencing	ITS-BRFM 1215
1228	Amauroderma sp.	Amauroderma Murrill	Ganodermataceae, Polyporales, Agaricomycetes, Basidiomycota			FAVEL Anne	GUY 09-60	COURTECUISSE Régis	FAVEL Anne	Wood-saprotroph WR	La Mirande	Cayenne, French Guiana	ITS sequencing	ITS-BRFM 1228
1240	Grammothele fuligo	Grammothele fuligo (Berk. & Broome) Ryvarden	Polyporaceae, Polyporales, Agaricomycetes, Basidiomycota			FAVEL Anne	GUY 09-124	LECHAT Christian	FAVEL Anne	Wood-saprotroph WR	palm	Regina, French Guiana	ITS sequencing	ITS-BRFM 1240
1242	Xylaria schweinitzii	Xylaria schweinitzii Berk. & M.A. Curtis	Xylariaceae, Xylariales, Sordariomycetes, Ascomycota		CLL 8029	LECHAT Christian		LECHAT Christian	LECHAT Christian	Wood-saprotroph SR(II)	botanic way, paracou	Sinnamary, French Guiana	ITS sequencing	ITS-BRFM 1242
1243	Xylaria cubensis	Xylaria cubensis (Mont.) Fr.	Xylariaceae, Xylariales, Sordariomycetes, Ascomycota		CLL 8061	LECHAT Christian		LECHAT Christian	LECHAT Christian	Wood-saprotroph SR(II)	Layon	Cayenne, French Guiana	ITS sequencing	ITS-BRFM 1243
1244	Xylaria scruposa	Xylaria scruposa (Fr.) Fr.	Xylariaceae, Xylariales, Sordariomycetes, Ascomycota		CLL 8065	LECHAT Christian		LECHAT Christian	LECHAT Christian	Wood-saprotroph SR(II)		Regina, French Guiana	ITS sequencing	ITS-BRFM 1244
1245	Sinosphaeria bambusicola	Sinosphaeria bambusicola J.Z. Yue & O.E. Erikss.	Thyridiaceae, Sordariales, Sordariomycetes, Ascomycota		CLL 8217	LECHAT Christian		LECHAT Christian	LECHAT Christian	Not determined		Regina, French Guiana	ITS sequencing	ITS-BRFM 1245
1280	Artolenzites elegans	Artolenzites elegans (Spreng.) Teixeira	Polyporaceae, Polyporales, Agaricomycetes, Basidiomycota			FAVEL Anne	CAL 09-201	ASTHER Marcel	NAVARRO David	Wood-saprotroph WR	Lifou Island	New Caledonia, Lifou, New Caledonia	ITS sequencing	ITS-BRFM 1280
1323	Fomes fomentarius	Fomes fomentarius (L.) Fr.	Polyporaceae, Polyporales, Agaricomycetes, Basidiomycota			FAVEL Anne	COR 09-245	NAVARRO David	NAVARRO David	Wood-saprotroph WR	Forest	Corsica, Castaniccia, France	ITS sequencing	ITS-BRFM 1323
1328	Hexagonia nitida	Hexagonia nitida Durieu & Mont.	Polyporaceae, Polyporales, Agaricomycetes, Basidiomycota			FAVEL Anne	ND 174	FAVEL Anne	FAVEL Anne	Wood-saprotroph WR	Forest	Vaucluse, Lourmarin, France	ITS sequencing	ITS-BRFM 1328
1331	Coniochaeta rubrosetosa sp. nov.		Coniochaetaceae, Coniochaetales, Sordariomycetes, Ascomycota		Lechat YM01	LECHAT Christian		LECHAT Christian	LECHAT Christian	Not determined		Hautes Alpes, France	ITS sequencing	ITS-BRFM 1331
1333	Xylaria curta	Xylaria curta Fr.	Xylariaceae, Xylariales, Sordariomycetes, Ascomycota		CLL 9034	LECHAT Christian		LECHAT Christian	LECHAT Christian	Wood-saprotroph SR(II)	Route de St Georges, savane roche, Regina	Regina, French Guiana	ITS sequencing	ITS-BRFM 1333
1334	Xylaria adscendens	Xylaria adscendens (Fr.) Fr.	Xylariaceae, Xylariales, Sordariomycetes, Ascomycota		CLL 9057	LECHAT Christian		LECHAT Christian	LECHAT Christian	Wood-saprotroph SR(II)	Route de St Georges, savane roche, Regina	Regina, French Guiana	ITS sequencing	ITS-BRFM 1334
1335	Xylaria multiplex var. microsperma	Xylaria multiplex var. microsperma (Speg.) Dennis	Xylariaceae, Xylariales, Sordariomycetes, Ascomycota		CLL 9067	LECHAT Christian		LECHAT Christian	LECHAT Christian	Wood-saprotroph SR(II)	Guyaflux, Paracou	Paracou, French Guiana	ITS sequencing	ITS-BRFM 1335
1336	Xylaria squamulosa	Xylaria squamulosa F. San Martín & J.D. Rogers	Xylariaceae, Xylariales, Sordariomycetes, Ascomycota		CLL 9080	LECHAT Christian		LECHAT Christian	LECHAT Christian	Wood-saprotroph SR(II)	Risque-tout, route de Saut Leodate	French Guiana	ITS sequencing	ITS-BRFM 1336
1337	Xylaria telfairi	Xylaria telfairii (Berk.) Sacc.	Xylariaceae, Xylariales, Sordariomycetes, Ascomycota		CLL 9094	LECHAT Christian		LECHAT Christian	LECHAT Christian	Wood-saprotroph SR(II)	parcelle 16, Paracou	Paracou, French Guiana	ITS sequencing	ITS-BRFM 1337
1338	Kretzschmaria pavimentosa	Kretzschmaria pavimentosa (Ces.) P.M.D. Martin	Xylariaceae, Xylariales, Sordariomycetes, Ascomycota		CLL 9098	LECHAT Christian		LECHAT Christian	LECHAT Christian	Wood-saprotroph	parcelle 16, Paracou	Paracou, French Guiana	ITS sequencing	ITS-BRFM 1338
1339	Xylaria comosoides	Xylaria comosoides Læssøe	Xylariaceae, Xylariales, Sordariomycetes, Ascomycota		CLL 9108	LECHAT Christian		LECHAT Christian	LECHAT Christian	Wood-saprotroph SR(II)	sentier de la Mirande, Réserve du grand Matoury	Matoury, French Guiana	ITS sequencing	ITS-BRFM 1339
1340	Xylaria multiplex	Xylaria multiplex (Kunze ex Fr.) Fr.	Xylariaceae, Xylariales, Sordariomycetes, Ascomycota		CLL 9113	LECHAT Christian		LECHAT Christian	LECHAT Christian	Wood-saprotroph SR(II)	sentier de la Mirande, Réserve du grand Matoury	Matoury, French Guiana	ITS sequencing	ITS-BRFM 1340
1343	Ophiocordyceps ditmarii	Ophiocordyceps ditmarii (Quél.) G.H. Sung, J.M. Sung	Ophiocordycipitaceae, Hypocreales, Sordariomycetes, Ascomycota		CLL 9211	LECHAT Christian		LECHAT Christian	LECHAT Christian	Entomo-pathogen	on fly	France	ITS sequencing	ITS-BRFM 1343
1344	Xylaria sp.	Xylaria Hill ex Schrank	Xylariaceae, Xylariales, Sordariomycetes, Ascomycota		CLL 9040	LECHAT Christian		LECHAT Christian	LECHAT Christian	Wood-saprotroph SR(II)	Forest, near airtrack, Regina	Regina, French Guiana	ITS sequencing	ITS-BRFM 1344
1360	Fomitopsis palustris	Fomitopsis palustris (Berk. & M.A. Curtis) Gilb. & Ryvarden	Fomitopsidaceae, Polyporales, Agaricomycetes, Basidiomycota			NAVARRO David	GUY 10-15	NAVARRO David	NAVARRO David	Wood-saprotroph BR	Kourou Beach, on dead coconut tree	French Guiana	ITS sequencing	ITS-BRFM 1360
1361	Trametes sp.	Trametes Fr.	Polyporaceae, Polyporales, Agaricomycetes, Basidiomycota			LEVASSEUR Anthony	GUY 10-36	LEVASSEUR Anthony	LEVASSEUR Anthony	Wood-saprotroph WR	Forest, Saint Elie	French Guiana	ITS sequencing	ITS-BRFM 1361
1368	Leiotrametes lactinea	Leiotrametes lactinea (Berk.) Welti & Courtec., Fungal Diversity 55: 60 (2012)	Polyporaceae, Polyporales, Agaricomycetes, Basidiomycota		RC-MART-10-212P	COURTECUISSE Régis		COURTECUISSE Régis	NAVARRO David	Wood-saprotroph WR	Hygrophile forest, Anse Couleuvre	Martinique	ITS sequencing	ITS-BRFM 1368
1369	Leiotrametes menziesii	Leiotrametes menziesii (Berk.) Welti & Courtec.	Polyporaceae, Polyporales, Agaricomycetes, Basidiomycota		RC-MART-10-74	COURTECUISSE Régis		COURTECUISSE Régis	NAVARRO David	Wood-saprotroph WR	dead wood, Anse Couleuvre	Martinique	ITS sequencing	ITS-BRFM 1369
1386	Xylaria sp.	Xylaria Hill ex Schrank	Xylariaceae, Xylariales, Sordariomycetes, Ascomycota		CLL 9011	LECHAT Christian		LECHAT Christian	LECHAT Christian	Wood-saprotroph SR(II)		French Guiana	ITS sequencing	ITS-BRFM 1386
1390	Annulohypoxylon sp.	Annulohypoxylon Y.M. Ju	Xylariaceae, Xylariales, Sordariomycetes, Ascomycota		CLL 9041	LECHAT Christian		LECHAT Christian	LECHAT Christian	Wood-saprotroph SR(II)	partially flooded forest, near the aerodrome, Regina	French Guiana	ITS sequencing	ITS-BRFM 1390
1396	Pycnoporus coccineus	Pycnoporus coccineus (Fr.) Bondartsev & Singer	Polyporaceae, Polyporales, Agaricomycetes, Basidiomycota			FAVEL Anne	AUST10-238	SIMON Annick	NAVARRO David	Wood-saprotroph WR	adelaide prospect	Adelaïde, Australia	ITS sequencing	ITS-BRFM 1396
1397	Fomitopsis palustris	Fomitopsis palustris (Berk. & M.A. Curtis) Gilb. & Ryvarden	Fomitopsidaceae, Polyporales, Agaricomycetes, Basidiomycota			NAVARRO David	LUM10-136	NAVARRO David	NAVARRO David	Wood-saprotroph BR	Centre aéré Luminy, Pinus sp.	Bouches du Rhone, Marseille, France	ITS sequencing	ITS-BRFM 1397
1431	Pycnoporus sanguineus	Pycnoporus sanguineus (L.) Murrill	Polyporaceae, Polyporales, Agaricomycetes, Basidiomycota		RC-GUAD-10-203	COURTECUISSE Régis		COURTECUISSE Régis	NAVARRO David	Wood-saprotroph WR	urban area, Petit bourg	Guadeloupe	ITS sequencing	ITS-BRFM 1431
1441	Geejayessia montana	Geejayessia montana Lechat & J. Fourn.	Nectriaceae, Hypocreales, Sordariomycetes, Ascomycota		CLL 10010	LECHAT Christian		LECHAT Christian	LECHAT Christian	Not determined	sentier de la cascade de la lance, parc du Mercantour	France	ITS sequencing	ITS-BRFM 1441
1445	Hypoxylon investiens	Hypoxylon investiens (Schwein.) M.A. Curtis	Xylariaceae, Xylariales, Sordariomycetes, Ascomycota		CLLG 10011	LECHAT Christian		LECHAT Christian	LECHAT Christian	Wood-saprotroph SR(II)	Saint-Elie path	French Guiana	ITS sequencing	ITS-BRFM 1445
1447	Xylaria schweinitzii	Xylaria schweinitzii Berk. & M.A. Curtis	Xylariaceae, Xylariales, Sordariomycetes, Ascomycota		CLLG10031	LECHAT Christian		LECHAT Christian	LECHAT Christian	Wood-saprotroph SR(II)	dead wood, Savane Roche	French Guiana	ITS sequencing	ITS-BRFM 1447
1448	Xylaria pallida	Xylaria pallida Berk. & Cooke	Xylariaceae, Xylariales, Sordariomycetes, Ascomycota		CLLG10033	LECHAT Christian		LECHAT Christian	LECHAT Christian	Wood-saprotroph SR(II)	dead wood, Savane Roche	French Guiana	ITS sequencing	ITS-BRFM 1448
1449	Camillea leprieurii	Camillea leprieurii (Mont.) Mont.	Graphostromataceae, Xylariales, Sordariomycetes, Ascomycota		CLLG 10045	LECHAT Christian		LECHAT Christian	LECHAT Christian	Wood-saprotroph	Theobroma plantation, Approuague, Regina	Regina, French Guiana	ITS sequencing	ITS-BRFM 1449
1454	Gloeophyllum odoratum	Gloeophyllum odoratum (Wulfen) Imazeki	Gloeophyllaceae, Gloeophyllales, Agaricomycetes, Basidiomycota			FAVEL Anne	NAN 10-237	NAVARRO David	NAVARRO David	Wood-saprotroph BR	softwood, forest, Rambervilliers	Vosges, Rambervilliers, France	ITS sequencing	ITS-BRFM 1454
1457	Fomitopsis spraguei	Fomitopsis spraguei (Berk. & M.A. Curtis) Gilb. & Ryvarden	Fomitopsidaceae, Polyporales, Agaricomycetes, Basidiomycota			FAVEL Anne	ERQ 10-267	CAZENAVE Robert	FAVEL Anne	Wood-saprotroph BR		Côtes-d'Armor, Erquy, France	ITS sequencing	ITS-BRFM 1457
1487	Aspergillus japonicus	Aspergillus japonicus Saito	Aspergillaceae, Eurotiales, Eurotiomycetes, Ascomycota		CBS 621.78	VERKLEIJ Gerard				Saprotroph SR		Brazil	ITS sequencing	ITS-BRFM 1487
1489	Aspergillus japonicus	Aspergillus japonicus Saito	Aspergillaceae, Eurotiales, Eurotiomycetes, Ascomycota		IMI 15952	SMITH David				Saprotroph SR		Ghana	ITS sequencing	ITS-BRFM 1489
1490	Aspergillus japonicus	Aspergillus japonicus Saito	Aspergillaceae, Eurotiales, Eurotiomycetes, Ascomycota		IMI 388715	SMITH David				Saprotroph SR	grape	Spain	ITS sequencing	ITS-BRFM 1490
1521	Aspergillus tubingensis	Aspergillus tubingensis Mosseray	Aspergillaceae, Eurotiales, Eurotiomycetes, Ascomycota			FAVEL Anne	GUY 10-134	NAVARRO David	NAVARRO David	Saprotroph SR		Kourou, French Guiana	ITS sequencing	ITS-BRFM 1521
1524	Nodulisporium sp.	Nodulisporium Preuss	Xylariaceae, Xylariales, Sordariomycetes, Ascomycota			NAVARRO David	PEU 10-135	NAVARRO David	NAVARRO David	Wood-saprotroph	micronized poplar	Bouches du Rhone, Marseille, France	ITS sequencing	ITS-BRFM 1524
1526	Fomitopsis palustris	Fomitopsis palustris (Berk. & M.A. Curtis) Gilb. & Ryvarden	Fomitopsidaceae, Polyporales, Agaricomycetes, Basidiomycota			NAVARRO David	LUM 11-09	NAVARRO David	NAVARRO David	Wood-saprotroph BR	hardwood, Luminy, Marseille	Bouches du Rhone, Marseille, France	ITS sequencing	ITS-BRFM 1526
1531	Polyporus squamosus	Polyporus squamosus (Huds.) Fr.	Polyporaceae, Polyporales, Agaricomycetes, Basidiomycota			FAVEL Anne	MEL 11-08	GARDIENNET Alain	NAVARRO David	Wood-saprotroph WR	Marais Poitevin	Deux-Sèvres, France	ITS sequencing	ITS-BRFM 1531
1532	Trametes versicolor	Trametes versicolor (L.) Lloyd	Polyporaceae, Polyporales, Agaricomycetes, Basidiomycota			LESAGE-MEESSEN Laurence	MEL 11-06	LESAGE-MEESSEN Laurence	LESAGE-MEESSEN Laurence	Wood-saprotroph WR	Chizé forest	Deux-Sèvres, France	ITS sequencing	ITS-BRFM 1532
1533	Trichaptum perrottetii	Trichaptum perrottetii (Lév.) Ryvarden	Polyporaceae, Polyporales, Agaricomycetes, Basidiomycota	MUCL 47130		FAVEL Anne				Wood-saprotroph WR	dead stump covered by mosses, Santi spiritus, Forest	Cuba	ITS sequencing	ITS-BRFM 1533
1541	Humphreya coffeata	Humphreya coffeata (Berk.) Steyaert	Ganodermataceae, Polyporales, Agaricomycetes, Basidiomycota			FAVEL Anne	MART11-89	NAVARRO David	FAVEL Anne	Wood-saprotroph WR	Forest, Anse Couleuvre	Martinique	ITS sequencing	ITS-BRFM 1541
1543	Ganoderma flaviporum	Ganoderma flaviporum (Murrill) Sacc. & Trotter	Ganodermataceae, Polyporales, Agaricomycetes, Basidiomycota			FAVEL Anne	GUAD11-47	MOREAU Pierre Arthur	NAVARRO David	Wood-saprotroph WR	garden, Bouillante	Guadeloupe	ITS sequencing	ITS-BRFM 1543
1548	Ganoderma weberianum	Ganoderma weberianum (Bres. & Henn. ex Sacc.) Steyaert	Ganodermataceae, Polyporales, Agaricomycetes, Basidiomycota			FAVEL Anne	MART11-72	WELTI Stéphane	FAVEL Anne	Wood-saprotroph WR	Xerophilic forest, Morne réduit	Martinique	ITS sequencing	ITS-BRFM 1548
1557	Leiotrametes menziesii	Leiotrametes menziesii (Berk.) Welti & Courtec.	Polyporaceae, Polyporales, Agaricomycetes, Basidiomycota			FAVEL Anne	MART11-103	WELTI Stéphane	FAVEL Anne	Wood-saprotroph WR	Forest, La caravelle, Pointe rouge	Martinique	ITS sequencing	ITS-BRFM 1557
1580	Hypomyces luteovirens	Hypomyces luteovirens (Fr.) Tul. & C. Tul.	Hypocreaceae, Hypocreales, Sordariomycetes, Ascomycota		CLL 10021	LECHAT Christian		LECHAT Christian	LECHAT Christian	Fungi-parasitic		Jura, Andelot-en-Montagne, France	ITS sequencing	ITS-BRFM 1580
1581	Cordyceps militaris	Cordyceps militaris (L.) Link	Cordycipitaceae, Hypocreales, Sordariomycetes, Ascomycota		CLL 10030	LECHAT Christian		LECHAT Christian	LECHAT Christian	Entomo-pathogen	Chafer larvae, St Martin sur Oust	France	ITS sequencing	ITS-BRFM 1581
1584	Cosmospora sp.	Cosmospora Rabenh.	Nectriaceae, Hypocreales, Sordariomycetes, Ascomycota		JF 11021	LECHAT Christian		FOURNIER Jacques	LECHAT Christian	Fungi-parasitic	parasited fungi, Eutypella quarternata on Fagus sp., Grand Bois	Ariège, Rimont, France	ITS sequencing	ITS-BRFM 1584
1601	Ganoderma lucidum	Ganoderma lucidum (Curtis) P. Karst.	Ganodermataceae, Polyporales, Agaricomycetes, Basidiomycota			FAVEL Anne	TER11-154	RIVOIRE Bernard	FAVEL Anne	Wood-saprotroph WR	Marais de Bonnefont, Terrou	Lot, Terrou, France	ITS sequencing	ITS-BRFM 1601
1604	Fomes fasciatus	Fomes fasciatus (Sw.) Cooke	Polyporaceae, Polyporales, Agaricomycetes, Basidiomycota	MUCL 53720		FAVEL Anne				Wood-saprotroph WR	dead standing trunk, Forest, Les Nouragues Research Station, grand plateau, approx. K16	French Guiana	ITS sequencing	ITS-BRFM 1604
1605	Grammothele fuligo	Grammothele fuligo (Berk. & Broome) Ryvarden	Polyporaceae, Polyporales, Agaricomycetes, Basidiomycota	MUCL 47494		FAVEL Anne				Wood-saprotroph WR	dead fallen petiole, Ogooué-Ivio, Parc National Ivio, Ipassa Biological Station	Gabon	ITS sequencing	ITS-BRFM 1605
1606	Cosmospora sp.	Cosmospora Rabenh.	Nectriaceae, Hypocreales, Sordariomycetes, Ascomycota		CLL 10028	LECHAT Christian		LECHAT Christian	LECHAT Christian	Not determined	Torrevejia, Caguna de la Nata	Spain	ITS sequencing	ITS-BRFM 1606
1607	Isaria farinosa	Isaria farinosa (Holmsk.) Fr.	Cordycipitaceae, Hypocreales, Sordariomycetes, Ascomycota		CLL 10038	LECHAT Christian		LECHAT Christian	LECHAT Christian	Entomo-pathogen	dead wood		ITS sequencing	ITS-BRFM 1607
1608	Ophiocordyceps ditmarii	Ophiocordyceps ditmarii (Quél.) G.H. Sung	Ophiocordycipitaceae, Hypocreales, Sordariomycetes, Ascomycota		CLL 11056	LECHAT Christian		LECHAT Christian	LECHAT Christian	Entomo-pathogen	Hornet	Cantal, Alleuze, France	ITS sequencing	ITS-BRFM 1608
1610	Lasionectria martinicensis	Lasionectria martinicensis Lechat & J. Fourn.	Nectriaceae, Hypocreales, Sordariomycetes, Ascomycota		CLL MAR085	LECHAT Christian		LECHAT Christian	LECHAT Christian	Not determined	Schoelcher, rivière Case navire	Martinique	ITS sequencing	ITS-BRFM 1610
1611	Thelonectria veuillotiana	Thelonectria veuillotiana (Sacc. & Roum.) P. Chaverri & C. Salg…	Nectriaceae, Hypocreales, Sordariomycetes, Ascomycota		CLL MAR10079	LECHAT Christian		LECHAT Christian	LECHAT Christian	Not determined	Case Pilote, Le Morne Venté	Martinique	ITS sequencing	ITS-BRFM 1611
1612	Eutypella sp.	Eutypella (Nitschke) Sacc.	Diatrypaceae, Xylariales, Sordariomycetes, Ascomycota		CLL MAR11047	LECHAT Christian		LECHAT Christian	LECHAT Christian	Wood-saprotroph	Bark, Trinité, Pointe Rouge	Martinique	ITS sequencing	ITS-BRFM 1612
1613	Eutypella sp.	Eutypella (Nitschke) Sacc.	Diatrypaceae, Xylariales, Sordariomycetes, Ascomycota		CLL MAR11092	LECHAT Christian		LECHAT Christian	LECHAT Christian	Wood-saprotroph	Bark, Trinité, Pointe Rouge	Martinique	ITS sequencing	ITS-BRFM 1613
1614	Eutypa sp.	Eutypa Tul. & C. Tul.	Diatrypaceae, Xylariales, Sordariomycetes, Ascomycota		CLL MAR11102	LECHAT Christian		LECHAT Christian	LECHAT Christian	Wood-saprotroph	Bark, Morne Vert, Trace forestiére de Caplet	Martinique	ITS sequencing	ITS-BRFM 1614
1615	Pronectria pertusariicola	Pronectria pertusariicola Lowen	Bionectriaceae, Hypocreales, Sordariomycetes, Ascomycota		JE 26401	LECHAT Christian		FOURNIER Jacques	LECHAT Christian	Not determined	Peltigera (lichen)	Spain	ITS sequencing	ITS-BRFM 1615
1616	Neonectria sp.	Neonectria Wollenw.	Nectriaceae, Hypocreales, Sordariomycetes, Ascomycota		JF 11017	LECHAT Christian		FOURNIER Jacques	LECHAT Christian	Not determined	Las Muras, Rimont (09)	Ariège, Rimont, France	ITS sequencing	ITS-BRFM 1616
1617	Neonectria sp.	Neonectria Wollenw.	Nectriaceae, Hypocreales, Sordariomycetes, Ascomycota		JF 11023	LECHAT Christian		FOURNIER Jacques	LECHAT Christian	Not determined	La Maille, Rimont (09)	Ariège, Rimont, France	ITS sequencing	ITS-BRFM 1617
1618	Cosmospora sp.	Cosmospora Rabenh.	Nectriaceae, Hypocreales, Sordariomycetes, Ascomycota		JF 11087	LECHAT Christian		FOURNIER Jacques	LECHAT Christian	Not determined	parasited fungi (Kretzschmaria deusta), Peyrou, Rimont (09)	Ariège, Rimont, France	ITS sequencing	ITS-BRFM 1618
1619	Cosmospora sp.	Cosmospora Rabenh.	Nectriaceae, Hypocreales, Sordariomycetes, Ascomycota		JF 11108	LECHAT Christian		FOURNIER Jacques	LECHAT Christian	Not determined	parasited fungi (Hymenochaete), Peyrou, Rimont (09)	Ariège, Rimont, France	ITS sequencing	ITS-BRFM 1619
1621	Stereum sp.	Stereum Hill ex Pers.	Stereaceae, Russulales, Agaricomycetes, Basidiomycota			FAVEL Anne	TER11-156	CAZENAVE Robert	FAVEL Anne	Wood-saprotroph	swamp, Lot Mayrinhac, Marais de Bonnefont	Lot, Mayrinhac-Lentour, France	ITS sequencing	ITS-BRFM 1621
1622	Phellinus robustus	Phellinus robustus (P. Karst.) Bourdot & Galzin	Hymenochaetaceae, Hymenochaetales, Agaricomycetes, Basidiomycota			FAVEL Anne	TER11-158	PENZ Romain	FAVEL Anne	Wood-saprotroph WR	Forest, Rocamadour, Vallée de l Alzou	Lot, Rocamadour, France	ITS sequencing	ITS-BRFM 1622
1623	Fomitopsis pinicola	Fomitopsis pinicola (Sw.) P. Karst.	Fomitopsidaceae, Polyporales, Agaricomycetes, Basidiomycota			FAVEL Anne	TER11-161	PENZ Romain	FAVEL Anne	Wood-saprotroph BR	wood (Pinus nigra), Rocamadour	Lot, Rocamadour, France	ITS sequencing	ITS-BRFM 1623
1624	Perenniporia martia	Perenniporia martia (Berk.) Ryvarden	Polyporaceae, Polyporales, Agaricomycetes, Basidiomycota			FAVEL Anne	MART11-115	WELTI Stéphane	FAVEL Anne	Wood-saprotroph WR	Forest, Case Pilote, Plateau Concorde sentier 2	Martinique	ITS sequencing	ITS-BRFM 1624
1625	Lentinus sp.	Lentinus Fr.	Polyporaceae, Polyporales, Agaricomycetes, Basidiomycota			FAVEL Anne	GUAD11-48	COURTECUISSE Régis	NAVARRO David	Wood-saprotroph	Bouillante, Maleure	Guadeloupe	ITS sequencing	ITS-BRFM 1625
1626	Lentinus sp.	Lentinus Fr.	Polyporaceae, Polyporales, Agaricomycetes, Basidiomycota			FAVEL Anne	GUAD 11-51	COURTECUISSE Régis	FAVEL Anne	Wood-saprotroph	Vieux Habitants, Plage de l'Etang	Guadeloupe	ITS sequencing	ITS-BRFM 1626
1627	Nigrofomes melanoporus	Nigrofomes melanoporus (Mont.) Murrill	Polyporaceae, Polyporales, Agaricomycetes, Basidiomycota	MUCL 53784		FAVEL Anne				Wood-saprotroph WR	dead fallen branch, Les Nouragues Research Station, petit plateau	French Guiana	ITS sequencing	ITS-BRFM 1627
1628	Mycosphaerella lateralis	Mycosphaerella lateralis Crous & M.J. Wingf.	Mycosphaerellaceae, Capnodiales, Dothideomycetes, Ascomycota	CBS 113294		FAVEL Anne				Not determined	Tzaneen	South Africa	ITS sequencing	ITS-BRFM 1628
1629	Xylaria microceras	Xylaria microceras (Mont.) Berk.	Xylariaceae, Xylariales, Sordariomycetes, Ascomycota	CBS 114989		FAVEL Anne				Wood-saprotroph SR(II)	wood, Hyde s rainforest block	Queensland, Australia	ITS sequencing	ITS-BRFM 1629
1630	Septoria eucalyptorum	Septoria eucalyptorum Crous	Mycosphaerellaceae, Capnodiales, Dothideomycetes, Ascomycota	CBS 118505		FAVEL Anne				Litter-saprotroph	leaf litter, leaf litter, Eucalyptus sp., Palampur	India	ITS sequencing	ITS-BRFM 1630
1631	Xylaria hypoxylon	Xylaria hypoxylon (L.) Grev.	Xylariaceae, Xylariales, Sordariomycetes, Ascomycota	CBS 122619		FAVEL Anne				Wood-saprotroph SR(II)	wood, , Grimsta Reserve near lake Malaren, Vallingby, Stockholm	Stockholm, Sweden	ITS sequencing	ITS-BRFM 1631
1632	Colletotrichum theobromicola	Colletotrichum theobromicola Delacr.	Glomerellaceae, Sordariales, Sordariomycetes, Ascomycota	CBS 124944		FAVEL Anne				Plant-pathogen	fruit rot, Theobroma cacao, Chiriqui : San Vincente	Panama	ITS sequencing	ITS-BRFM 1632
1635	Passalora fulva	Passalora fulva (Cooke) U. Braun & Crous	Mycosphaerellaceae, Capnodiales, Dothideomycetes, Ascomycota	CBS 193.63		FAVEL Anne				Plant-pathogen	Tomato, greenhouse, Rummen (Belgium)	Belgium	ITS sequencing	ITS-BRFM 1635
1636	Lophiostoma arundinis	Lophiostoma arundinis (Pers.) Ces. & De Not.	Lophiostomataceae, Pleosporales, Dothideomycetes, Ascomycota	CBS 621.86		FAVEL Anne				Wood saprotroph	Kt. Obwalden, Sarnen, Sarnersee	Switzerland	ITS sequencing	ITS-BRFM 1636
1637	Gibberella pulicaris	Gibberella pulicaris (Fr.) Sacc.	Nectriaceae, Hypocreales, Sordariomycetes, Ascomycota		CLL 10036	LECHAT Christian		LECHAT Christian	LECHAT Christian	Plant-pathogen		Dordogne, France	ITS sequencing	ITS-BRFM 1637
1639	Neonectria coccinea	Neonectria coccinea (Pers.) Rossman & Samuels	Nectriaceae, Hypocreales, Sordariomycetes, Ascomycota		CLL 11056B	LECHAT Christian		LECHAT Christian	LECHAT Christian	Plant-pathogen SR	on Cordyceps sp,	Cantal, Alleuze, France	ITS sequencing	ITS-BRFM 1639
1640	Bionectria ralfsii	Bionectria ralfsii (Berk. & Broome) Schroers & Samuels	Bionectriaceae, Hypocreales, Sordariomycetes, Ascomycota		CLL 11068	LECHAT Christian		LECHAT Christian	LECHAT Christian	Not determined		France	ITS sequencing	ITS-BRFM 1640
1642	Cosmospora sp.	Cosmospora Rabenh.	Nectriaceae, Hypocreales, Sordariomycetes, Ascomycota		JF 11042	LECHAT Christian		FOURNIER Jacques	LECHAT Christian	Not determined	on Hypoxylon sp. , Las Muros, Rimont	Ariège, Rimont, France	ITS sequencing	ITS-BRFM 1642
1644	Acremonium bavaricum	Acremonium bavaricum Brackel	Incertae sedis Hypocreales, Hypocreales, Sordariomycetes, Ascomycota		WvB5796, CLL11067	LECHAT Christian			LECHAT Christian	Lichenicolous	Brakel, Germany	Germany	ITS sequencing	ITS-BRFM 1644
1648	Pestalotiopsis sp.	Pestalotiopsis Steyaert	Amphisphaeriaceae, Xylariales, Sordariomycetes, Ascomycota			RECORD Eric	NCi6	ARFI Yonathan	ARFI Yonathan	Wood-saprotroph	intertidal trunk, Mangrove, Baie de St Vincent	New Caledonia, New Caledonia	ITS sequencing	ITS-BRFM 1648
1655	Pleurotus eryngii	Pleurotus eryngii (DC.) Quél.	Pleurotaceae, Agaricales, Agaricomycetes, Basidiomycota		MYCSA PE Crete 1	GUIMBERTEAU Jacques			GUIMBERTEAU Jacques (MycSA)	Wood-saprotroph WR	root of Eryngium plant, Crète	Greece	ITS sequencing	ITS-BRFM 1655
1657	Pleurotus ostreatus	Pleurotus ostreatus (Jacq.) P. Kumm.	Pleurotaceae, Agaricales, Agaricomycetes, Basidiomycota		MYCSA PO JG 96	GUIMBERTEAU Jacques			GUIMBERTEAU Jacques (MycSA)	Wood-saprotroph WR	Broad-leaved tree, Rivière le Ciron	Gironde, France	ITS sequencing	ITS-BRFM 1657
1670	Lepista sp.	Lepista (Fr.) W.G. Sm.	Tricholomataceae, Agaricales, Agaricomycetes, Basidiomycota		MYCSA LN GR	GUIMBERTEAU Jacques			GUIMBERTEAU Jacques (MycSA)	Litter-saprotroph		Greece	ITS sequencing	ITS-BRFM 1670
1671	Lepista sp.	Lepista (Fr.) W.G. Sm.	Tricholomataceae, Agaricales, Agaricomycetes, Basidiomycota		MYCSA L nimb.	GUIMBERTEAU Jacques			GUIMBERTEAU Jacques (MycSA)	Litter-saprotroph		France	ITS sequencing	ITS-BRFM 1671
1673	Irpex lacteus	Irpex lacteus (Fr.) Fr.	Irpicaceae, Polyporales, Agaricomycetes, Basidiomycota	CBS 533.97		FAVEL Anne				Wood-saprotroph WR	Grimeck	Germany	ITS sequencing	ITS-BRFM 1673
1676	Lentinus crinitus	Lentinus crinitus (L.) Fr.	Polyporaceae, Polyporales, Agaricomycetes, Basidiomycota			FAVEL Anne	GUY 10-120	LEVASSEUR Anthony	NAVARRO David	Wood-saprotroph WR	St Georges, clairiere	Saint-Georges, French Guiana	ITS sequencing	ITS-BRFM 1676
1678	Pleurotus sp.	Pleurotus (Fr.) P. Kumm.	Pleurotaceae, Agaricales, Agaricomycetes, Basidiomycota		MYCSA P citrino India	GUIMBERTEAU Jacques			GUIMBERTEAU Jacques (MycSA)	Wood-saprotroph	Broad-leaved tree	India	ITS sequencing	ITS-BRFM 1678
1710	Ganoderma sp.	Ganoderma P. Karst.	Ganodermataceae, Polyporales, Agaricomycetes, Basidiomycota			FAVEL Anne	MART 12-11	COURTECUISSE Régis	FAVEL Anne	Wood-saprotroph WR	Les Anses d'Arlet, Grande anse	Martinique	ITS sequencing	ITS-BRFM 1710
1748	Cosmospora sp.	Cosmospora Rabenh.	Nectriaceae, Hypocreales, Sordariomycetes, Ascomycota		CLL 12003	LECHAT Christian		LECHAT Christian	LECHAT Christian	Not determined	Forest of Chize (79)	France	ITS sequencing	ITS-BRFM 1748
1763	Striatibotrys oleronensis	Striatibotrys oleronensis (Lechat & Hairaud) L. Lombard & Crous…	Stachybotryaceae, Hypocreales, Sordariomycetes, Ascomycota		MH 160412	LECHAT Christian			LECHAT Christian	Not determined	Saint Trojan	Charente-Maritime, Ile-de-Ré, France	ITS sequencing	ITS-BRFM 1763
1788	Leiotrametes menziesii	Leiotrametes menziesii (Berk.) Welti & Courtec.	Polyporaceae, Polyporales, Agaricomycetes, Basidiomycota		BRFM 1281 PC3	LESAGE-MEESSEN Laurence			LESAGE-MEESSEN Laurence	Wood-saprotroph WR		New Caledonia, New Caledonia	ITS sequencing	ITS-BRFM 1788
1798	Trametes polyzona	Trametes polyzona (Pers.) Corner	Polyporaceae, Polyporales, Agaricomycetes, Basidiomycota		BRFM 1305 SS6	LESAGE-MEESSEN Laurence			LESAGE-MEESSEN Laurence	Wood-saprotroph WR		Zimbabwe	ITS sequencing	ITS-BRFM 1798
1827	Aspergillus fumigatus	Aspergillus fumigatus Fresen.	Aspergillaceae, Eurotiales, Eurotiomycetes, Ascomycota		TOU001 (isolat 13107762)	DESOUBEAUX Guillaume				Human-pathogen, saprotroph SR	human parasite, CHRU Tours	France	ITS sequencing	ITS-BRFM 1827
1830	Ganoderma weberianum	Ganoderma weberianum (Bres. & Henn. ex Sacc.) Steyaert	Ganodermataceae, Polyporales, Agaricomycetes, Basidiomycota			FAVEL Anne	MART 12-44	LECHAT Christian	FAVEL Anne	Wood-saprotroph WR	La Trinité Lieu-dit Tartane, Bois de Pointe Rouge	Martinique	ITS sequencing	ITS-BRFM 1830
1851	Ganoderma weberianum	Ganoderma weberianum (Bres. & Henn. ex Sacc.) Steyaert	Ganodermataceae, Polyporales, Agaricomycetes, Basidiomycota			FAVEL Anne	MART 12-67	NAVARRO David	FAVEL Anne	Wood-saprotroph WR	La Trinite, Lieu dit Tartane, La Caravelle	Martinique	ITS sequencing	ITS-BRFM 1851
1856	Pycnoporus puniceus	Pycnoporus puniceus (Fr.) Ryvarden	Polyporaceae, Polyporales, Agaricomycetes, Basidiomycota			FAVEL Anne	BAL 13-05B	COURTECUISSE Régis	NAVARRO David	Wood-saprotroph WR	wood log, Lombok, on wood log	Lombok, Indonesia	ITS sequencing	ITS-BRFM 1856
1859	Boletus edulis	Boletus edulis Bull.	Boletaceae, Boletales, Agaricomycetes, Basidiomycota		Be 23 APS	GUIMBERTEAU Jacques			GUIMBERTEAU Jacques (MycSA)	Ectomycorrhizal		France	ITS sequencing	ITS-BRFM 1859
1865	Omphalotus olearius	Omphalotus olearius (DC.) Singer	Omphalotaceae, Agaricales, Agaricomycetes, Basidiomycota			FAVEL Anne	LUM 13-13	NAVARRO David	NAVARRO David	Plant-pathogen	living wood, Garden patio Polytech	Bouches du Rhone, Marseille, France	ITS sequencing	ITS-BRFM 1865
1906	Humphreya coffeata	Humphreya coffeata (Berk.) Steyaert	Ganodermataceae, Polyporales, Agaricomycetes, Basidiomycota			FAVEL Anne	MART14-03	NAVARRO David	FAVEL Anne	Wood-saprotroph WR	wood, Le Precheur	Martinique	ITS sequencing	ITS-BRFM 1906
1929	Hexagonia hydnoides	Hexagonia hydnoides (Sw.) M. Fidalgo	Polyporaceae, Polyporales, Agaricomycetes, Basidiomycota			FAVEL Anne	GUA 10-177	WELTI Stéphane	NAVARRO David	Wood-saprotroph WR	dead wood , Quartier Cayenne, Capesterre	Guadeloupe	ITS sequencing	ITS-BRFM 1929
1936	Fusarium sporotrichioides	Fusarium sporotrichioides Sherb.	Nectriaceae, Hypocreales, Sordariomycetes, Ascomycota		MycSA-INRA 101	FORGET Florence				Plant-pathogen	Corn seeds, Maïze Grain, Cereal, 2001	Gers, France	Species primer amplification
1937	Fusarium sporotrichioides	Fusarium sporotrichioides Sherb.	Nectriaceae, Hypocreales, Sordariomycetes, Ascomycota		MycSA-INRA 102	FORGET Florence				Plant-pathogen	Corn seeds, Maïze Grain, Cereal, 2001	Loir-et-Cher, France	Species primer amplification
1939	Fusarium avenaceum	Fusarium avenaceum (Fr.) Sacc.	Nectriaceae, Hypocreales, Sordariomycetes, Ascomycota		MycSA-INRA 112	FORGET Florence				Plant-pathogen	Corn seeds, Maïze Grain, Cereal, 2001	Loir-et-Cher, France	Species primer amplification
1944	Fusarium culmorum	Fusarium culmorum (Wm.G. Sm.) Sacc.	Nectriaceae, Hypocreales, Sordariomycetes, Ascomycota		MycSA-INRA 124	FORGET Florence				Plant-pathogen	Wheat seeds, Soissons, Soft Grain Wheat, Cereal, Soissons, 2001	Meuse, France	Species primer amplification
1949	Fusarium culmorum	Fusarium culmorum (Wm.G. Sm.) Sacc.	Nectriaceae, Hypocreales, Sordariomycetes, Ascomycota		MycSA-INRA 129	FORGET Florence				Plant-pathogen	Wheat seeds, Soissons, Soft Grain Wheat, Cereal, Soissons, 2001	Cher, France	Species primer amplification
1967	Fusarium graminearum	Fusarium graminearum Schwabe	Nectriaceae, Hypocreales, Sordariomycetes, Ascomycota		MycSA-INRA 149	FORGET Florence				Plant-pathogen	Wheat seeds, Soft Grain Wheat, Cereal, 2002	Oise, France	Species primer amplification
1973	Fusarium graminearum	Fusarium graminearum Schwabe	Nectriaceae, Hypocreales, Sordariomycetes, Ascomycota		MycSA-INRA 155	FORGET Florence				Plant-pathogen	Wheat seeds, Soissons, Soft Grain Wheat, Cereal, Soissons, 2001	Cher, France	Species primer amplification
1977	Fusarium graminearum	Fusarium graminearum Schwabe	Nectriaceae, Hypocreales, Sordariomycetes, Ascomycota		MycSA-INRA 159	FORGET Florence				Plant-pathogen	Wheat seeds, Soft Grain Wheat, Cereal, 2001	Cher, France	Species primer amplification
1982	Fusarium graminearum	Fusarium graminearum Schwabe	Nectriaceae, Hypocreales, Sordariomycetes, Ascomycota		MycSA-INRA 165	FORGET Florence				Plant-pathogen	Wheat seeds, Soft Grain Wheat, Cereal, 2002	Seine-Maritime, France	Species primer amplification
1995	Fusarium graminearum	Fusarium graminearum Schwabe	Nectriaceae, Hypocreales, Sordariomycetes, Ascomycota		MycSA-INRA 178	FORGET Florence				Plant-pathogen	Wheat seeds, Soft Grain Wheat, Cereal, 2002	Eure, France	Species primer amplification
2020	Fusarium graminearum	Fusarium graminearum Schwabe	Nectriaceae, Hypocreales, Sordariomycetes, Ascomycota		MycSA-INRA 201	FORGET Florence				Plant-pathogen	Wheat seeds, Soissons, Soft Grain Wheat, Cereal, Soissons, 2001	Orne, France	Species primer amplification
2040	Fusarium culmorum	Fusarium culmorum (Wm.G. Sm.) Sacc.	Nectriaceae, Hypocreales, Sordariomycetes, Ascomycota		MycSA-INRA 233, B3	FORGET Florence				Plant-pathogen	Wheat seeds, Soissons, Soft Grain Wheat, Cereal, Soissons, 1997	Loire-Atlantique, France	Species primer amplification
2108	Fusarium culmorum	Fusarium culmorum (Wm.G. Sm.) Sacc.	Nectriaceae, Hypocreales, Sordariomycetes, Ascomycota		MycSA-INRA 305, I1	FORGET Florence				Plant-pathogen	Wheat seeds, Soissons, Soft Grain Wheat, Cereal, Soissons, 1997	Vienne, France	Species primer amplification
2138	Fusarium culmorum	Fusarium culmorum (Wm.G. Sm.) Sacc.	Nectriaceae, Hypocreales, Sordariomycetes, Ascomycota		MycSA-INRA 337, O2	FORGET Florence				Plant-pathogen	Wheat seeds, Acalou, Hard Grain Wheat, Cereal, Acalou, 1998	Haute-Garonne, France	Species primer amplification
2163	Fusarium proliferatum	Fusarium proliferatum (Matsush.) Nirenberg	Nectriaceae, Hypocreales, Sordariomycetes, Ascomycota		MycSA-INRA 365	FORGET Florence				Plant-pathogen	Corn seeds, Maïze, Cereal, 2005		Species primer amplification
2166	Fusarium verticillioides	Fusarium verticillioides (Sacc.) Nirenberg	Nectriaceae, Hypocreales, Sordariomycetes, Ascomycota		MycSA-INRA 368	FORGET Florence				Plant-pathogen	Corn seeds, Maïze, Cereal, 2005		Species primer amplification
2167	Fusarium verticillioides	Fusarium verticillioides (Sacc.) Nirenberg	Nectriaceae, Hypocreales, Sordariomycetes, Ascomycota		MycSA-INRA 369	FORGET Florence				Plant-pathogen	Corn seeds, Maïze, Cereal, 2005		Species primer amplification
2168	Fusarium subglutinans	Fusarium subglutinans (Wollenw. & Reinking) P.E. Nelson	Nectriaceae, Hypocreales, Sordariomycetes, Ascomycota		MycSA-INRA 370	FORGET Florence				Plant-pathogen	Corn seeds, Maïze, Cereal, 2005		Species primer amplification
2169	Fusarium verticillioides	Fusarium verticillioides (Sacc.) Nirenberg	Nectriaceae, Hypocreales, Sordariomycetes, Ascomycota		MycSA-INRA 371	FORGET Florence				Plant-pathogen	Corn seeds, Maïze, Cereal, 2005		Species primer amplification
2198	Fusarium verticillioides	Fusarium verticillioides (Sacc.) Nirenberg	Nectriaceae, Hypocreales, Sordariomycetes, Ascomycota		MycSA-INRA 424	FORGET Florence				Plant-pathogen	Corn seeds, Maïze, Cereal, 2005		Species primer amplification
2250	Fusarium verticillioides	Fusarium verticillioides (Sacc.) Nirenberg	Nectriaceae, Hypocreales, Sordariomycetes, Ascomycota		MycSA-INRA 62	FORGET Florence				Plant-pathogen	Corn seeds, Maïze Grain, Cereal		Species primer amplification
2251	Fusarium verticillioides	Fusarium verticillioides (Sacc.) Nirenberg	Nectriaceae, Hypocreales, Sordariomycetes, Ascomycota		MycSA-INRA 63	FORGET Florence				Plant-pathogen	Corn seeds, Maïze Grain, Cereal		Species primer amplification
2252	Fusarium verticillioides	Fusarium verticillioides (Sacc.) Nirenberg	Nectriaceae, Hypocreales, Sordariomycetes, Ascomycota		MycSA-INRA 64	FORGET Florence				Plant-pathogen	Corn seeds, Maïze Grain, Cereal		Species primer amplification
2257	Fusarium graminearum	Fusarium graminearum Schwabe	Nectriaceae, Hypocreales, Sordariomycetes, Ascomycota		MycSA-INRA 91	FORGET Florence				Plant-pathogen	Corn seeds, Maïze Grain, Cereal, 2001	Gers, France	Species primer amplification
2261	Trametes maxima	Trametes maxima (Mont.) A. David & Rajchenb.	Polyporaceae, Polyporales, Agaricomycetes, Basidiomycota			FAVEL Anne	MART 15-2	NAVARRO David	FAVEL Anne	Wood-saprotroph WR	Anse Levrier, Prêcheur	Martinique	ITS sequencing	ITS-BRFM 2261
2262	Ganoderma martinicense	Ganoderma martinicense Welti & Courtec.	Ganodermataceae, Polyporales, Agaricomycetes, Basidiomycota			FAVEL Anne	MART 15-6	NAVARRO David	FAVEL Anne	Wood-saprotroph WR	Balata, Fort de France	Martinique	ITS sequencing	ITS-BRFM 2262
2263	Trametes polyzona	Trametes polyzona (Pers.) Corner	Polyporaceae, Polyporales, Agaricomycetes, Basidiomycota			FAVEL Anne	MART 15-9	NAVARRO David	FAVEL Anne	Wood-saprotroph WR	roadside stump, roadside	Martinique	ITS sequencing	ITS-BRFM 2263
2264	Loweporus tephroporus	Loweporus tephroporus (Mont.) Ryvarden	Polyporaceae, Polyporales, Agaricomycetes, Basidiomycota			FAVEL Anne	MART 15-12	NAVARRO David	FAVEL Anne	Wood-saprotroph	urban trunk, Littoral urban trunk, Prêcheur	Martinique	ITS sequencing	ITS-BRFM 2264
2265	Fomes meliae	Fomes meliae (Underw.) Murrill	Polyporaceae, Polyporales, Agaricomycetes, Basidiomycota			FAVEL Anne	MART 15-13	NAVARRO David	FAVEL Anne	Wood-saprotroph WR	urban wood, parking station thermale d Absalon, Fort de france	Martinique	ITS sequencing	ITS-BRFM 2265
2266	Ganoderma sp.	Ganoderma P. Karst.	Ganodermataceae, Polyporales, Agaricomycetes, Basidiomycota			FAVEL Anne	MART 15-16	NAVARRO David	FAVEL Anne	Wood-saprotroph WR	Trace du Plateau Michel, Fort de France	Martinique	ITS sequencing	ITS-BRFM 2266
2298	Fusarium tricinctum	Fusarium tricinctum (Corda) Sacc.	Nectriaceae, Hypocreales, Sordariomycetes, Ascomycota		MycSA-INRA 104	FORGET Florence				Plant-pathogen	Corn seeds, Maïze Grain, Cereal, 2001	France	Species primer amplification
2300	Rosellinia corticium	Rosellinia corticium (Schwein.) Sacc.	Xylariaceae, Xylariales, Sordariomycetes, Ascomycota			DECOCK Cony	MUCL 55931	DECOCK Cony	DECOCK Cony	Plant-pathogen	Garden	France
2301	Pseudonectria buxii	Pseudonectria buxi (DC.) Seifert	Nectriaceae, Hypocreales, Sordariomycetes, Ascomycota			MASSART Pascale	MUCL 55932	MASSART Pascale	MASSART Pascale	Plant-pathogen	Garden	France
2302	Phoma aliena	Phoma aliena (Fr.) Aa & Boerema	Pleosporaceae, Pleosporales, Dothideomycetes, Ascomycota			MASSART Pascale	MUCL 55933	MASSART Pascale	MASSART Pascale	Plant-pathogen	Garden	France
2303	Clonostachys buxi	Clonostachys buxi (J.C. Schmidt ex Link) Schroers	Bionectriaceae, Hypocreales, Sordariomycetes, Ascomycota			MASSART Pascale	MUCL 55934	MASSART Pascale	MASSART Pascale	Plant-pathogen	Garden	France
2304	Stagonosporopsis dorenboschii	Stagonosporopsis dorenboschii (Noordel. & Gruyter) Aveskamp	Pleosporaceae, Pleosporales, Dothideomycetes, Ascomycota			MASSART Pascale	MUCL 55936	MASSART Pascale	MASSART Pascale	Plant-pathogen	Garden	France
2305	Leptosphaerulina argentinensis	Leptosphaerulina argentinensis (Speg.) J.H. Graham & Luttr.	Pleosporaceae, Pleosporales, Dothideomycetes, Ascomycota			MASSART Pascale	MUCL 55937	MASSART Pascale	MASSART Pascale	Plant-pathogen	Garden	France
2306	Perenniporia martia	Perenniporia martia (Berk.) Ryvarden	Polyporaceae, Polyporales, Agaricomycetes, Basidiomycota			DECOCK Cony	MUCL 55847	DECOCK Cony	DECOCK Cony	Wood-saprotroph WR	Dead fallen branch on the ground, Forest, Absalon	Martinique	ITS sequencing	ITS-BRFM 2306
2307	Perenniporia martia	Perenniporia martia (Berk.) Ryvarden	Polyporaceae, Polyporales, Agaricomycetes, Basidiomycota			DECOCK Cony	MUCL 55863	DECOCK Cony	DECOCK Cony	Wood-saprotroph WR	Dead staing trunk, Forest, Absalon	Martinique	ITS sequencing	ITS-BRFM 2307
2308	Pleurotus djamor	Pleurotus djamor (Rumph. ex Fr.) Boedijn	Pleurotaceae, Agaricales, Agaricomycetes, Basidiomycota			DECOCK Cony	MUCL 55872	DECOCK Cony	DECOCK Cony	Wood-saprotroph WR		Martinique	ITS sequencing	ITS-BRFM 2308
2309	Leiotrametes menziesii	Leiotrametes menziesii (Berk.) Welti & Courtec.	Polyporaceae, Polyporales, Agaricomycetes, Basidiomycota			DECOCK Cony	MUCL 55913	DECOCK Cony	DECOCK Cony	Wood-saprotroph WR		Martinique	ITS sequencing	ITS-BRFM 2309
2310	Perenniporiella neofulva	Perenniporiella neofulva (Lloyd) Decock & Ryvarden	Polyporaceae, Polyporales, Agaricomycetes, Basidiomycota			DECOCK Cony	MUCL 55818	DECOCK Cony	DECOCK Cony	Wood-saprotroph WR	Dead branch on the ground, Mixed secondary forest (Theobroma cacao), Anse Couleuvre, sentier cascade	Martinique	ITS sequencing	ITS-BRFM 2310
2311	Perenniporiella neofulva	Perenniporiella neofulva (Lloyd) Decock & Ryvarden	Polyporaceae, Polyporales, Agaricomycetes, Basidiomycota			DECOCK Cony	MUCL 55819	DECOCK Cony	DECOCK Cony	Wood-saprotroph WR	dead branch on the ground, Mixed secondary forest (Theobroma cacao), Anse Couleuvre, sentier cascade	Martinique	ITS sequencing	ITS-BRFM 2311
2312	Perenniporiella neofulva	Perenniporiella neofulva (Lloyd) Decock & Ryvarden	Polyporaceae, Polyporales, Agaricomycetes, Basidiomycota			DECOCK Cony	MUCL 55850	DECOCK Cony	DECOCK Cony	Wood-saprotroph WR	Dead fallen branch on the ground, Forest, Absalon	Martinique	ITS sequencing	ITS-BRFM 2312
2313	Perenniporiella neofulva	Perenniporiella neofulva (Lloyd) Decock & Ryvarden	Polyporaceae, Polyporales, Agaricomycetes, Basidiomycota			DECOCK Cony	MUCL 55838	DECOCK Cony	DECOCK Cony	Wood-saprotroph WR	Dead fallen branch on the ground, unidentified angiosperm, Chemin de Anse Couleuvre vers Anse Levrier	Martinique	ITS sequencing	ITS-BRFM 2313
2314	Perenniporiella neofulva	Perenniporiella neofulva (Lloyd) Decock & Ryvarden	Polyporaceae, Polyporales, Agaricomycetes, Basidiomycota			DECOCK Cony	MUCL 55835	DECOCK Cony	DECOCK Cony	Wood-saprotroph WR	Hanging dead branch, Forest, La Proprete, Morne Rouge	Martinique	ITS sequencing	ITS-BRFM 2314
2315	Leiotrametes menziesii	Leiotrametes menziesii (Berk.) Welti & Courtec.	Polyporaceae, Polyporales, Agaricomycetes, Basidiomycota			DECOCK Cony	MUCL 55831	DECOCK Cony	DECOCK Cony	Wood-saprotroph WR	Anse Couleuvre, sentier Cascade	Martinique	ITS sequencing	ITS-BRFM 2315
2316	Humphreya coffeata	Humphreya coffeata (Berk.) Steyaert	Ganodermataceae, Polyporales, Agaricomycetes, Basidiomycota			DECOCK Cony	MUCL 55820	DECOCK Cony	DECOCK Cony	Wood-saprotroph WR	Soil: on buried wood, Anse Couleuvre, sentier Cascade	Martinique	ITS sequencing	ITS-BRFM 2316
2317	Trametes membranacea	Trametes membranacea (Sw.) Kreisel	Polyporaceae, Polyporales, Agaricomycetes, Basidiomycota			DECOCK Cony	MUCL 55823	DECOCK Cony	DECOCK Cony	Wood-saprotroph WR	Anse Couleuvre, sentier Cascade	Martinique	ITS sequencing	ITS-BRFM 2317
2318	Trametes polyzona	Trametes polyzona (Pers.) Corner	Polyporaceae, Polyporales, Agaricomycetes, Basidiomycota			DECOCK Cony	MUCL 55836	DECOCK Cony	DECOCK Cony	Wood-saprotroph WR	Forest, La Proprete, Morne Rouge	Martinique	ITS sequencing	ITS-BRFM 2318
2319	Polyporus sp.	Polyporus P. Micheli ex Adans.	Polyporaceae, Polyporales, Agaricomycetes, Basidiomycota			DECOCK Cony	MUCL 55821	DECOCK Cony	DECOCK Cony	Wood-saprotroph WR	Dead branch on the ground, Anse Couleuvre, sentier Cascade, foret secondaire	Martinique	ITS sequencing	ITS-BRFM 2319
2320	Polyporus tricholoma	Polyporus tricholoma Mont.	Polyporaceae, Polyporales, Agaricomycetes, Basidiomycota			DECOCK Cony	MUCL 55824	DECOCK Cony	DECOCK Cony	Wood-saprotroph WR	Anse Couleuvre, sentier Cascade	Martinique	ITS sequencing	ITS-BRFM 2320
2321	Tinctoporellus epimiltinus	Tinctoporellus epimiltinus (Berk. & Broome) Ryvarden	Polyporaceae, Polyporales, Agaricomycetes, Basidiomycota			DECOCK Cony	MUCL 55833	DECOCK Cony	DECOCK Cony	Wood-saprotroph WR	Dead fallen branch on the ground, Forest, La Proprete	Martinique	ITS sequencing	ITS-BRFM 2321
2322	Tinctoporellus epimiltinus	Tinctoporellus epimiltinus (Berk. & Broome) Ryvarden	Polyporaceae, Polyporales, Agaricomycetes, Basidiomycota			DECOCK Cony	MUCL 55834	DECOCK Cony	DECOCK Cony	Wood-saprotroph WR	Dead branch on the ground, Forest, La Proprete, Morne Rouge	Martinique	ITS sequencing	ITS-BRFM 2322
2323	Tinctoporellus epimiltinus	Tinctoporellus epimiltinus (Berk. & Broome) Ryvarden	Polyporaceae, Polyporales, Agaricomycetes, Basidiomycota			DECOCK Cony	MUCL 55839	DECOCK Cony	DECOCK Cony	Wood-saprotroph WR	Fos St Denis, sentier du Piton Boucher	Martinique	ITS sequencing	ITS-BRFM 2323
2324	Tinctoporellus epimiltinus	Tinctoporellus epimiltinus (Berk. & Broome) Ryvarden	Polyporaceae, Polyporales, Agaricomycetes, Basidiomycota			DECOCK Cony	MUCL 55840	DECOCK Cony	DECOCK Cony	Wood-saprotroph WR	Fos St Denis, sentier du Piton Boucher	Martinique	ITS sequencing	ITS-BRFM 2324
2325	Tinctoporellus epimiltinus	Tinctoporellus epimiltinus (Berk. & Broome) Ryvarden	Polyporaceae, Polyporales, Agaricomycetes, Basidiomycota			DECOCK Cony	MUCL 55841	DECOCK Cony	DECOCK Cony	Wood-saprotroph WR	Font St Denis, sentier du Piton Boucher	Martinique	ITS sequencing	ITS-BRFM 2325
2327	Asterostroma sp.	Asterostroma Massee	Lachnocladiaceae, Russulales, Agaricomycetes, Basidiomycota			DECOCK Cony	MUCL 55870	DECOCK Cony	DECOCK Cony	Wood-saprotroph	La Philippe, Foret departementale et domaniale, Sainte Marie	Martinique	ITS sequencing	ITS-BRFM 2327
2328	Asterostroma sp.	Asterostroma Massee	Lachnocladiaceae, Russulales, Agaricomycetes, Basidiomycota			DECOCK Cony	MUCL 55844	DECOCK Cony	DECOCK Cony	Wood-saprotroph	Sentier du Piton Boucher, Font St Denis	Martinique	ITS sequencing	ITS-BRFM 2328
2329	Asterostroma sp.	Asterostroma Massee	Lachnocladiaceae, Russulales, Agaricomycetes, Basidiomycota			DECOCK Cony	MUCL 55866	DECOCK Cony	DECOCK Cony	Wood-saprotroph	branch decomposed on the ground, xerophile forest, La Caravelle, Pointe rouge	Martinique	ITS sequencing	ITS-BRFM 2329
2330	Perenniporia centrali-africana	Perenniporia centrali-africana Decock & Mossebo	Polyporaceae, Polyporales, Agaricomycetes, Basidiomycota			DECOCK Cony	MUCL 55785	DECOCK Cony	DECOCK Cony	Wood-saprotroph WR	Regina	French Guiana	ITS sequencing	ITS-BRFM 2330
2331	Chaetomella raphigera	Chaetomella raphigera Swift	Chaetomellaceae, Chaetomellales, Leotiomycetes, Ascomycota			DECOCK Cony	MUCL 55916	DECOCK Cony	DECOCK Cony	Not determined		Martinique	ITS sequencing	ITS-BRFM 2331
2332	Paracremonium inflatum	Paracremonium inflatum L. Lombard & Crous	Nectriaceae, Hypocreales, Sordariomycetes, Ascomycota			DECOCK Cony	MUCL 55784	DECOCK Cony	DECOCK Cony	Not determined	Stroma of cordyceps	French Guiana	ITS sequencing	ITS-BRFM 2332
2333	Tinctoporellus epimiltinus	Tinctoporellus epimiltinus (Berk. & Broome) Ryvarden	Polyporaceae, Polyporales, Agaricomycetes, Basidiomycota			DECOCK Cony	MUCL 55843	DECOCK Cony	DECOCK Cony	Wood-saprotroph WR	Sentier Piton Boucher, Font St Denis	Martinique	ITS sequencing	ITS-BRFM 2333
2334	Stilbocrea colubrensis	Stilbocrea colubrensis Lechat & J. Fourn.	Bionectriaceae, Hypocreales, Sordariomycetes, Ascomycota		CLLM16003	LECHAT Christian		LECHAT Christian	LECHAT Christian	Wood-saprotroph	dead bamboo, Anse Couleuvre, Precheur	Martinique	ITS sequencing	ITS-BRFM 2334
2335	Stilbocrea gracilipes	Stilbocrea gracilipes (Tul. & C. Tul.) Samuels & Seifert	Bionectriaceae, Hypocreales, Sordariomycetes, Ascomycota		CLLM16011	LECHAT Christian		LECHAT Christian	LECHAT Christian	Wood-saprotroph	dead wood with bark, Forest of Montravail	Martinique	ITS sequencing	ITS-BRFM 2335
2336	Stilbocrea macrostoma	Stilbocrea macrostoma (Berk. & M.A. Curtis) Höhn.	Bionectriaceae, Hypocreales, Sordariomycetes, Ascomycota		CLLM16015	LECHAT Christian		LECHAT Christian	LECHAT Christian	Wood-saprotroph	dead wood with bark, Forest Departementalo-domaniale de la Phillippe, Sainte-Marie	Martinique	ITS sequencing	ITS-BRFM 2336
2337	Peethambara spirostriata	Peethambara spirostriata (Rossman) Rossman	Stachybotryaceae, Hypocreales, Sordariomycetes, Ascomycota		CLLM16029	LECHAT Christian		LECHAT Christian	LECHAT Christian	Wood-saprotroph	dead wood with bark, Le Bois la Charles, Le Saint Esprit	Martinique	ITS sequencing	ITS-BRFM 2337
2338	Cookeina sulcipes	Cookeina sulcipes (Berk.) Kuntze	Sarcoscyphaceae, Pezizales, Pezizomycetes, Ascomycota		CLLM16068	LECHAT Christian		LECHAT Christian	LECHAT Christian	Wood-saprotroph	dead wood with bark, Precheur, Anse Couleuvre	Martinique	ITS sequencing	ITS-BRFM 2338
2339	Vivantia guadalupensis	Vivantia guadalupensis J.D. Rogers	Xylariaceae, Xylariales, Sordariomycetes, Ascomycota		MJF16071	LECHAT Christian				Wood-saprotroph	dead wood with bark, Trinite, Tartane, Pointe Rouge	Martinique	ITS sequencing	ITS-BRFM 2339
2340	Vivantia guadalupensis	Vivantia guadalupensis J.D. Rogers	Xylariaceae, Xylariales, Sordariomycetes, Ascomycota		MJF16085	LECHAT Christian				Wood-saprotroph	dead wood with bark, Forest Departemantalo-domaniale de La Phillipe, Sainte-Marie	Martinique	ITS sequencing	ITS-BRFM 2340
2341	Camillea obularia	Camillea obularia (Fr.) Læssøe	Graphostromataceae, Xylariales, Sordariomycetes, Ascomycota		MJF16091	LECHAT Christian				Wood-saprotroph	dead wood with bark, Forest Departementalo-domaniale de la Phillipe	Martinique	ITS sequencing	ITS-BRFM 2341
2342	Cosmospora sp.	Cosmospora Rabenh.	Nectriaceae, Hypocreales, Sordariomycetes, Ascomycota		MJF16100	LECHAT Christian				Fungi-parasitic	fungus Xylaria schweinitzii, Pont de Alma, Fort de France	Martinique	ITS sequencing	ITS-BRFM 2342
2343	Camillea scriblita	Camillea scriblita (Mont.) Læssøe	Graphostromataceae, Xylariales, Sordariomycetes, Ascomycota		MJF16119	LECHAT Christian				Wood-saprotroph	dead wood with bark, Precheur, Anse Couleuvre	Martinique	ITS sequencing	ITS-BRFM 2343
2344	Cosmospora sp.	Cosmospora Rabenh.	Nectriaceae, Hypocreales, Sordariomycetes, Ascomycota		MJF16184	LECHAT Christian				Fungi-parasitic	fungus Xylaria schweinitzii, Forest Departementalo-domaniale des Pitons du Carbet, route forestiere de la Proprete	Martinique	ITS sequencing	ITS-BRFM 2344
2345	Cosmospora sp.	Cosmospora Rabenh.	Nectriaceae, Hypocreales, Sordariomycetes, Ascomycota		MJF16194	LECHAT Christian				Fungi-parasitic	fungus Kretzschmaria sanvicensis, Forest Departementalo-domaniale des Pitons du Carbet, extremité de la route de Fond Baron	Martinique	ITS sequencing	ITS-BRFM 2345
2346	Fomitiporia jamaicensis	Fomitiporia jamaicensis Murrill	Hymenochaetaceae, Hymenochaetales, Agaricomycetes, Basidiomycota		MUCL 56175	DECOCK Cony		DECOCK Cony	DECOCK Cony	Wood-saprotroph WR		Martinique	ITS sequencing	ITS-BRFM 2346
2347	Fomitiporia sp.	Fomitiporia Murrill	Hymenochaetaceae, Hymenochaetales, Agaricomycetes, Basidiomycota		MUCL 56182	DECOCK Cony		DECOCK Cony	DECOCK Cony	Wood-saprotroph		Martinique	ITS sequencing	ITS-BRFM 2347
2348	Fomitiporia jamaicensis	Fomitiporia jamaicensis Murrill	Hymenochaetaceae, Hymenochaetales, Agaricomycetes, Basidiomycota		MUCL 56184	DECOCK Cony		DECOCK Cony	DECOCK Cony	Wood-saprotroph WR		Martinique	ITS sequencing	ITS-BRFM 2348
2349	Fomitiporia sp.	Fomitiporia Murrill	Hymenochaetaceae, Hymenochaetales, Agaricomycetes, Basidiomycota		MUCL 56185	DECOCK Cony		DECOCK Cony	DECOCK Cony	Wood-saprotroph		Martinique	ITS sequencing	ITS-BRFM 2349
2350	Fomitiporia jamaicensis	Fomitiporia jamaicensis Murrill	Hymenochaetaceae, Hymenochaetales, Agaricomycetes, Basidiomycota		MUCL 56190	DECOCK Cony		DECOCK Cony	DECOCK Cony	Wood-saprotroph WR		Martinique	ITS sequencing	ITS-BRFM 2350
2351	Fomitiporia jamaicensis	Fomitiporia jamaicensis Murrill	Hymenochaetaceae, Hymenochaetales, Agaricomycetes, Basidiomycota		MUCL 56192	DECOCK Cony		DECOCK Cony	DECOCK Cony	Wood-saprotroph WR		Martinique (Island), Martinique	ITS sequencing	ITS-BRFM 2351
2352	Fomitiporia neotropica	Fomitiporia neotropica Campos-Santana	Hymenochaetaceae, Hymenochaetales, Agaricomycetes, Basidiomycota		MUCL 56199	DECOCK Cony		DECOCK Cony	DECOCK Cony	Wood-saprotroph WR	Hanging dead branch, Forest departementalo-domaniale La Philippe, Sainte Marie	Martinique	ITS sequencing	ITS-BRFM 2352
2353	Fomitiporia jamaicensis	Fomitiporia jamaicensis Murrill	Hymenochaetaceae, Hymenochaetales, Agaricomycetes, Basidiomycota		MUCL 56201	DECOCK Cony		DECOCK Cony	DECOCK Cony	Wood-saprotroph WR		Martinique	ITS sequencing	ITS-BRFM 2353
2354	Fomitiporia sp.	Fomitiporia Murrill	Hymenochaetaceae, Hymenochaetales, Agaricomycetes, Basidiomycota		MUCL 56204	DECOCK Cony		DECOCK Cony	DECOCK Cony	Wood-saprotroph WR		Martinique	ITS sequencing	ITS-BRFM 2354
2355	Fomitiporia sp.	Fomitiporia Murrill	Hymenochaetaceae, Hymenochaetales, Agaricomycetes, Basidiomycota		MUCL 56206	DECOCK Cony		DECOCK Cony	DECOCK Cony	Wood-saprotroph WR		Martinique	ITS sequencing	ITS-BRFM 2355
2356	Truncospora tropicalis	Truncospora tropicalis Vlasák & Spirin	Polyporaceae, Polyporales, Agaricomycetes, Basidiomycota		MUCL 56176	DECOCK Cony		DECOCK Cony	DECOCK Cony	Wood-saprotroph	Dead branch on the ground	Martinique	ITS sequencing	ITS-BRFM 2356
2357	Truncospora tropicalis	Truncospora tropicalis Vlasák & Spirin	Polyporaceae, Polyporales, Agaricomycetes, Basidiomycota		MUCL 56180	DECOCK Cony		DECOCK Cony	DECOCK Cony	Wood-saprotroph	Dead branch on the ground	Martinique	ITS sequencing	ITS-BRFM 2357
2358	Truncospora tropicalis	Truncospora tropicalis Vlasák & Spirin	Polyporaceae, Polyporales, Agaricomycetes, Basidiomycota		MUCL 56183	DECOCK Cony		DECOCK Cony	DECOCK Cony	Wood-saprotroph	Dead branch on the ground	Martinique	ITS sequencing	ITS-BRFM 2358
2359	Truncospora tropicalis	Truncospora tropicalis Vlasák & Spirin	Polyporaceae, Polyporales, Agaricomycetes, Basidiomycota		MUCL 56189	DECOCK Cony		DECOCK Cony	DECOCK Cony	Wood-saprotroph	Hanging dead branch	Martinique	ITS sequencing	ITS-BRFM 2359
2360	Truncospora tropicalis	Truncospora tropicalis Vlasák & Spirin	Polyporaceae, Polyporales, Agaricomycetes, Basidiomycota		MUCL 56197	DECOCK Cony		DECOCK Cony	DECOCK Cony	Wood-saprotroph	Hanging dead branch, La Caravelle, La Trinite	Martinique	ITS sequencing	ITS-BRFM 2360
2361	Ganoderma sp.	Ganoderma P. Karst.	Ganodermataceae, Polyporales, Agaricomycetes, Basidiomycota		MUCL 56208	DECOCK Cony		DECOCK Cony	DECOCK Cony	Wood-saprotroph WR		Martinique	ITS sequencing	ITS-BRFM 2361
2362	Ganoderma sp.	Ganoderma P. Karst.	Ganodermataceae, Polyporales, Agaricomycetes, Basidiomycota		MUCL 56177	DECOCK Cony		DECOCK Cony	DECOCK Cony	Wood-saprotroph WR		Martinique	ITS sequencing	ITS-BRFM 2362
2363	Perenniporia centrali-africana	Perenniporia centrali-africana Decock & Mossebo	Polyporaceae, Polyporales, Agaricomycetes, Basidiomycota		MUCL 56193	DECOCK Cony		DECOCK Cony	DECOCK Cony	Wood-saprotroph WR		Martinique	ITS sequencing	ITS-BRFM 2363
2364	Inonotus micantissimus	Inonotus micantissimus (Rick) Rajchenb.	Hymenochaetaceae, Hymenochaetales, Agaricomycetes, Basidiomycota		MUCL 56203	DECOCK Cony		DECOCK Cony	DECOCK Cony	Wood-saprotroph		Martinique	ITS sequencing	ITS-BRFM 2364
2365	Inonotus micantissimus	Inonotus micantissimus (Rick) Rajchenb.	Hymenochaetaceae, Hymenochaetales, Agaricomycetes, Basidiomycota		MUCL 56198	DECOCK Cony		DECOCK Cony	DECOCK Cony	Wood-saprotroph	fallen trunk , Forest departementalo-domaniale La Philippe, Sainte Marie	Martinique	ITS sequencing	ITS-BRFM 2365
2366	Tropicoporus tropicalis	Tropicoporus tropicalis (M.J. Larsen & Lombard) L.W. Zhou & Y.C…	Hymenochaetaceae, Hymenochaetales, Agaricomycetes, Basidiomycota		MUCL 56187	DECOCK Cony		DECOCK Cony	DECOCK Cony	Wood-saprotroph WR		Martinique	ITS sequencing	ITS-BRFM 2366
2367	Nigroporus vinosus	Nigroporus vinosus (Berk.) Murrill	Polyporaceae, Polyporales, Agaricomycetes, Basidiomycota		MUCL 56186	DECOCK Cony		DECOCK Cony	DECOCK Cony	Wood-saprotroph WR		Martinique	ITS sequencing	ITS-BRFM 2367
2368	Haploporus alabamae	Haploporus alabamae (Berk. & Cooke) Y.C. Dai & Niemelä	Polyporaceae, Polyporales, Agaricomycetes, Basidiomycota		MUCL 56194	DECOCK Cony	CD 56194	DECOCK Cony	DECOCK Cony	Wood-saprotroph	Dead branch on the ground, meso-xerophile forest	Martinique	ITS sequencing	ITS-BRFM 2368
2369	Fulvifomes sp.	Fulvifomes Murrill	Hymenochaetaceae, Hymenochaetales, Agaricomycetes, Basidiomycota		MUCL 56200	DECOCK Cony		DECOCK Cony	DECOCK Cony	Wood-saprotroph WR		Martinique	ITS sequencing	ITS-BRFM 2369
2370	Amylosporus sp.	Amylosporus Ryvarden	Bondarzewiaceae, Russulales, Agaricomycetes, Basidiomycota		MUCL 56213	DECOCK Cony		DECOCK Cony	DECOCK Cony	Wood-saprotroph		Martinique	ITS sequencing	ITS-BRFM 2370
2371	Navisporus sp.	Navisporus Ryvarden	Polyporaceae, Polyporales, Agaricomycetes, Basidiomycota		MUCL 56206	DECOCK Cony		DECOCK Cony	DECOCK Cony	Wood-saprotroph		Martinique	ITS sequencing	ITS-BRFM 2371
2372	Fomitopsis pinicola	Fomitopsis pinicola (Sw.) P. Karst.	Fomitopsidaceae, Polyporales, Agaricomycetes, Basidiomycota			NAVARRO David	BOU 16-01 A	ROSSO Marie-Noelle	NAVARRO David	Wood-saprotroph BR	wood	Bouches du Rhone, La Bouilladisse, France	ITS sequencing	ITS-BRFM 2372
2373	Fomitopsis pinicola	Fomitopsis pinicola (Sw.) P. Karst.	Fomitopsidaceae, Polyporales, Agaricomycetes, Basidiomycota			NAVARRO David	BOU 16-01 B	ROSSO Marie-Noelle	NAVARRO David	Wood-saprotroph BR	wood	Bouches du Rhone, La Bouilladisse, France	ITS sequencing	ITS-BRFM 2373
2374	Microporellus obovatus	Microporellus obovatus (Jungh.) Ryvarden	Polyporaceae, Polyporales, Agaricomycetes, Basidiomycota		MUCL 55830	DECOCK Cony		DECOCK Cony	DECOCK Cony	Wood-saprotroph	Le Precheur, Anse couleuvre, sentier cascade	Martinique	ITS sequencing	ITS-BRFM 2374
2375	Inonotus rickii	Inonotus rickii (Pat.) D.A. Reid	Hymenochaetaceae, Hymenochaetales, Agaricomycetes, Basidiomycota		MUCL 55869	DECOCK Cony		DECOCK Cony	DECOCK Cony	Plant-pathogen	Dead stump, Forest departementale domaniale de La Philippe, Ste Marie	Martinique	ITS sequencing	ITS-BRFM 2375
2376	Tropicoporus linteus	Tropicoporus linteus (Berk. & M.A. Curtis) L.W. Zhou & Y.C. Dai…	Hymenochaetaceae, Hymenochaetales, Agaricomycetes, Basidiomycota		MUCL 55867	DECOCK Cony		DECOCK Cony	DECOCK Cony	Wood-saprotroph WR	Dead stump, unidentified angiosperm, La Trinite, Presqu ile de La Caravelle, Pointe rouge	Martinique (Island), Martinique	ITS sequencing	ITS-BRFM 2376
2377	Tropicoporus linteus	Tropicoporus linteus (Berk. & M.A. Curtis) L.W. Zhou & Y.C. Dai…	Hymenochaetaceae, Hymenochaetales, Agaricomycetes, Basidiomycota		MUCL 55868	DECOCK Cony		DECOCK Cony	DECOCK Cony	Wood-saprotroph WR	Dead stump, unidentified angiosperm, La Trinité, Presqu ile de La Caravelle, Pointe rouge	Martinique (Island), Martinique	ITS sequencing	ITS-BRFM 2377
2378	Phellinus apiahynus	Phellinus apiahynus (Speg.) Rajchenb. & J.E. Wright	Hymenochaetaceae, Hymenochaetales, Agaricomycetes, Basidiomycota		MUCL 55786	DECOCK Cony		DECOCK Cony	DECOCK Cony	Wood-saprotroph WR	Regina	French Guiana	ITS sequencing	ITS-BRFM 2378
2379	Nigrofomes melanoporus	Nigrofomes melanoporus (Mont.) Murrill	Polyporaceae, Polyporales, Agaricomycetes, Basidiomycota		MUCL 55851	DECOCK Cony		DECOCK Cony	DECOCK Cony	Wood-saprotroph WR	Dead fallen trunk, unidentified angiosperm, Fond Baron, Fort de France	Martinique	ITS sequencing	ITS-BRFM 2379
2380	Phellinus amazonicus sp. nov.	Phellinus amazonicus Campos Santana & Decock	Hymenochaetaceae, Hymenochaetales, Agaricomycetes, Basidiomycota		MUCL 55663	DECOCK Cony		DECOCK Cony	DECOCK Cony	Wood-saprotroph WR	Dead fallen trunk, Regina, réserve naturelle des Nouragues, station Parare	Les Nouragues, French Guiana	ITS sequencing	ITS-BRFM 2380
2381	Phellinus amazonicus sp. nov.	Phellinus amazonicus Campos Santana & Decock	Hymenochaetaceae, Hymenochaetales, Agaricomycetes, Basidiomycota		MUCL 55617	DECOCK Cony		DECOCK Cony	DECOCK Cony	Wood-saprotroph WR	Dead fallen trunk, Regina, réserve naturelle des Nouragues, station Parare	Les Nouragues, French Guiana	ITS sequencing	ITS-BRFM 2381
2382	Phellinus amazonicus sp. nov.	Phellinus amazonicus Campos Santana & Decock	Hymenochaetaceae, Hymenochaetales, Agaricomycetes, Basidiomycota		MUCL 55627	DECOCK Cony		DECOCK Cony	DECOCK Cony	Wood-saprotroph WR	Daed fallen trunk, Regina, réserve naturelle des Nouragues, station Parare	Les Nouragues, French Guiana	ITS sequencing	ITS-BRFM 2382
2383	Ganoderma resinaceum	Ganoderma resinaceum Boud.	Ganodermataceae, Polyporales, Agaricomycetes, Basidiomycota		MUCL 55832	DECOCK Cony		DECOCK Cony	DECOCK Cony	Wood-saprotroph WR	La Trinité, Presqu ile de La Caravelle	Martinique	ITS sequencing	ITS-BRFM 2383
2384	Nigrofomes melanoporus	Nigrofomes melanoporus (Mont.) Murrill	Polyporaceae, Polyporales, Agaricomycetes, Basidiomycota		MUCL 55619	DECOCK Cony		DECOCK Cony	DECOCK Cony	Wood-saprotroph WR		Les Nouragues, French Guiana	ITS sequencing	ITS-BRFM 2384
2385	Jumillera viridis	Jumillera viridis (Theiss.) J.D. Rogers	Xylariaceae, Xylariales, Sordariomycetes, Ascomycota		MJF16129	LECHAT Christian				Wood-saprotroph	dead wood with bark, Anses d'Arlet Circuit du cap Salomon	Martinique	ITS sequencing	ITS-BRFM 2385
2386	Jumillera cinerea	Jumillera cinerea (Ellis & Everh.) J.D. Rogers	Xylariaceae, Xylariales, Sordariomycetes, Ascomycota		MJF16124	LECHAT Christian				Wood-saprotroph	dead wood with bark, Anses d'Arlet Circuit du cap Salomon	Martinique	ITS sequencing	ITS-BRFM 2386
2387	Microcera larvarum	Microcera larvarum (Fuckel) Gräfenhan	Nectriaceae, Hypocreales, Sordariomycetes, Ascomycota		AG16026	LECHAT Christian				Entomo-pathogen	Physconia grisea and Melanelixia (lichens), Vougeot en Cote d Or	Côte-d'Or, Vougeot, France	ITS sequencing	ITS-BRFM 2387
2388	Microcera larvarum	Microcera larvarum (Fuckel) Gräfenhan	Nectriaceae, Hypocreales, Sordariomycetes, Ascomycota		AG16020	LECHAT Christian				Entomo-pathogen	Physconia grisea (lichen)	Côte-d'Or, Dijon, France	ITS sequencing	ITS-BRFM 2388
2389	Pronectria robergei	Pronectria robergei (Mont. & Desm.) Lowen	Bionectriaceae, Hypocreales, Sordariomycetes, Ascomycota		AG16041	LECHAT Christian				Lichenicolous	Peltigera rufescens (lichen), Til Chatel en Cote d Or	Côte-d'Or, Tij Chatel, France	ITS sequencing	ITS-BRFM 2389
2391	Pronectria pertusariicola	Pronectria pertusariicola Lowen	Bionectriaceae, Hypocreales, Sordariomycetes, Ascomycota		AG16010	LECHAT Christian				Lichenicolous	Pertusaria albescens (lichen), Etaules en Cote d Or	Côte-d'Or, Etauled, France	ITS sequencing	ITS-BRFM 2391
2392	Stylonectria sp.	Stylonectria Höhn.	Nectriaceae, Hypocreales, Sordariomycetes, Ascomycota		CLL16016	LECHAT Christian		LECHAT Christian	LECHAT Christian	Fungi-parasitic	Coelomycetes (fungi) on Alnus albobetula, Bourg Saint Maurice	France	ITS sequencing	ITS-BRFM 2392
2393	Fusarium sp.	Fusarium Link	Nectriaceae, Hypocreales, Sordariomycetes, Ascomycota		AG16064	LECHAT Christian				Plant-pathogen	Punctelia subrudecta (lichen), Ramatuelle dans le Var	France	ITS sequencing	ITS-BRFM 2393
2394	Cookeina speciosa	Cookeina speciosa (Fr.) Dennis	Sarcoscyphaceae, Pezizales, Pezizomycetes, Ascomycota		CLLM16018	LECHAT Christian		LECHAT Christian	LECHAT Christian	Wood-saprotroph	dead wood, Forest Departementalo domaniale de la Philippe Sainte Marie	Martinique	ITS sequencing	ITS-BRFM 2394
2395	Cookeina tricholoma	Cookeina tricholoma (Mont.) Kuntze	Sarcoscyphaceae, Pezizales, Pezizomycetes, Ascomycota		CLLM16027	LECHAT Christian		LECHAT Christian	LECHAT Christian	Wood-saprotroph	dead wood, Le Bois La Charles Le Saint Esprit	Martinique	ITS sequencing	ITS-BRFM 2395
2396	Acremonium sp.	Acremonium Link	Incertae sedis Hypocreales, Hypocreales, Sordariomycetes, Ascomycota		AG160642B	LECHAT Christian				Not determined	dead wood lying trunk, Cap Taillard Ramatuelle Var	Var, Ramatuelle, France	ITS sequencing	ITS-BRFM 2396
2397	Coriolopsis cognata	Coriolopsis cognata (Berk.) Ryvarden	Polyporaceae, Polyporales, Agaricomycetes, Basidiomycota		MUCL 56214	DECOCK Cony	CD 56214	DECOCK Cony	DECOCK Cony	Wood-saprotroph		Martinique	ITS sequencing	ITS-BRFM 2397
2398	Haploporus alabamae	Haploporus alabamae (Berk. & Cooke) Y.C. Dai & Niemelä	Polyporaceae, Polyporales, Agaricomycetes, Basidiomycota		MUCL 56181	DECOCK Cony	CD 56181	DECOCK Cony	DECOCK Cony	Wood-saprotroph	meso xerophile forest, Ravine Fond Boucher St Pierre	Martinique (Island), Martinique	ITS sequencing
2399	Haploporus alabamae	Haploporus alabamae (Berk. & Cooke) Y.C. Dai & Niemelä	Polyporaceae, Polyporales, Agaricomycetes, Basidiomycota		MUCL 56205	DECOCK Cony	CD 56205	DECOCK Cony	DECOCK Cony	Wood-saprotroph	Hanging dead branch, Trois Ilets	Martinique (Island), Martinique	ITS sequencing
2400	Haploporus alabamae	Haploporus alabamae (Berk. & Cooke) Y.C. Dai & Niemelä	Polyporaceae, Polyporales, Agaricomycetes, Basidiomycota		MUCL 56179	DECOCK Cony	CD 56179	DECOCK Cony	DECOCK Cony	Wood-saprotroph	dead wood branch, Ravine Fond Boucher st Pierre	Martinique (Island), Martinique	ITS sequencing
2401	Pyrofomes albomarginatus	Pyrofomes albomarginatus (Zipp. ex Lév.) Ryvarden	Polyporaceae, Polyporales, Agaricomycetes, Basidiomycota		MUCL 55859	DECOCK Cony		DECOCK Cony	DECOCK Cony	Wood-saprotroph WR	Dead fallen branch, approx. 20cm diam, unidentified ang, Sentier Cascade Anse Couleuvre Le Precheur	Martinique	ITS sequencing	ITS-BRFM 2401
2402	Perenniporia martia	Perenniporia martia (Berk.) Ryvarden	Polyporaceae, Polyporales, Agaricomycetes, Basidiomycota		CD 55664	DECOCK Cony	CD 55664	DECOCK Cony	DECOCK Cony	Wood-saprotroph WR		French Guiana	ITS sequencing	ITS-BRFM 2402
2403	Larssoniporia tropicalis	Larssoniporia tropicalis (Cooke) Y.C. Dai	Polyporaceae, Polyporales, Agaricomycetes, Basidiomycota		MUCL 55837	DECOCK Cony		DECOCK Cony	DECOCK Cony	Wood-saprotroph	Forest, La Proprete, Morne Rouge	Martinique (Island), Martinique	ITS sequencing	ITS-BRFM 2403
2404	Larssoniporia tropicalis	Larssoniporia tropicalis (Cooke) Y.C. Dai	Polyporaceae, Polyporales, Agaricomycetes, Basidiomycota		MUCL 55826	DECOCK Cony		DECOCK Cony	DECOCK Cony	Wood-saprotroph	Sentier cascade, Anse couleuvre, Le Precheur	Martinique	ITS sequencing	ITS-BRFM 2404
2405	Larssoniporia tropicalis	Larssoniporia tropicalis (Cooke) Y.C. Dai	Polyporaceae, Polyporales, Agaricomycetes, Basidiomycota		MUCL 55848	DECOCK Cony		DECOCK Cony	DECOCK Cony	Wood-saprotroph	Hygophile forest, Fond Baron et Absalon	Martinique	ITS sequencing	ITS-BRFM 2405
2406	Truncospora sp.	Truncospora Pilát ex Pilát	Polyporaceae, Polyporales, Agaricomycetes, Basidiomycota		CD 55862	DECOCK Cony		DECOCK Cony	DECOCK Cony	Wood-saprotroph		Martinique	ITS sequencing	ITS-BRFM 2406
2407	Polyporus sp.	Polyporus P. Micheli ex Adans.	Polyporaceae, Polyporales, Agaricomycetes, Basidiomycota		CD 55661	DECOCK Cony		DECOCK Cony	DECOCK Cony	Wood-saprotroph WR		French Guiana	ITS sequencing	ITS-BRFM 2407
2408	Perenniporia sp.	Perenniporia Murrill	Polyporaceae, Polyporales, Agaricomycetes, Basidiomycota		CD 55308	DECOCK Cony		DECOCK Cony	DECOCK Cony	Wood-saprotroph WR		French Guiana	ITS sequencing	ITS-BRFM 2408
2409	Perenniporia sp.	Perenniporia Murrill	Polyporaceae, Polyporales, Agaricomycetes, Basidiomycota		CD 55307	DECOCK Cony		DECOCK Cony	DECOCK Cony	Wood-saprotroph WR	Municipality of Regina, Natural Reserve Nouragues, CNRS Parare Research Station	French Guiana	ITS sequencing	ITS-BRFM 2409
2410	Fomitiporia sp.	Fomitiporia Murrill	Hymenochaetaceae, Hymenochaetales, Agaricomycetes, Basidiomycota		CD 55666	DECOCK Cony		DECOCK Cony	DECOCK Cony	Wood-saprotroph WR		French Guiana	ITS sequencing	ITS-BRFM 2410
2411	Fomitiporia sp.	Fomitiporia Murrill	Hymenochaetaceae, Hymenochaetales, Agaricomycetes, Basidiomycota		CD 55667	DECOCK Cony	CD 55667	DECOCK Cony	DECOCK Cony	Wood-saprotroph WR		French Guiana	ITS sequencing	ITS-BRFM 2411
2412	Fomitiporia sp.	Fomitiporia Murrill	Hymenochaetaceae, Hymenochaetales, Agaricomycetes, Basidiomycota		CD 55633	DECOCK Cony		DECOCK Cony	DECOCK Cony	Wood-saprotroph WR		French Guiana	ITS sequencing	ITS-BRFM 2412
2413	Fomitiporia sp.	Fomitiporia Murrill	Hymenochaetaceae, Hymenochaetales, Agaricomycetes, Basidiomycota		CD 55871	DECOCK Cony		DECOCK Cony	DECOCK Cony	Wood-saprotroph WR		Martinique	ITS sequencing	ITS-BRFM 2413
2414	Fomitiporia sp.	Fomitiporia Murrill	Hymenochaetaceae, Hymenochaetales, Agaricomycetes, Basidiomycota		CD 55792	DECOCK Cony		DECOCK Cony	DECOCK Cony	Wood-saprotroph WR		French Guiana	ITS sequencing	ITS-BRFM 2414
2415	Fomitiporia sp.	Fomitiporia Murrill	Hymenochaetaceae, Hymenochaetales, Agaricomycetes, Basidiomycota		CD 55662	DECOCK Cony		DECOCK Cony	DECOCK Cony	Wood-saprotroph WR		French Guiana	ITS sequencing
2416	Fuscoporia sp.	Fuscoporia Murrill	Hymenochaetaceae, Hymenochaetales, Agaricomycetes, Basidiomycota		CD 55827	DECOCK Cony		DECOCK Cony	DECOCK Cony	Wood-saprotroph WR		Martinique	ITS sequencing	ITS-BRFM 2416
2417	Fuscoporia sp.	Fuscoporia Murrill	Hymenochaetaceae, Hymenochaetales, Agaricomycetes, Basidiomycota		CD 55852	DECOCK Cony		DECOCK Cony	DECOCK Cony	Wood-saprotroph WR		Martinique	ITS sequencing	ITS-BRFM 2417
2418	Fuscoporia sp.	Fuscoporia Murrill	Hymenochaetaceae, Hymenochaetales, Agaricomycetes, Basidiomycota		CD 55853	DECOCK Cony		DECOCK Cony	DECOCK Cony	Wood-saprotroph WR		Martinique	ITS sequencing	ITS-BRFM 2418
2419	Fuscoporia sp.	Fuscoporia Murrill	Hymenochaetaceae, Hymenochaetales, Agaricomycetes, Basidiomycota		CD 55858	DECOCK Cony		DECOCK Cony	DECOCK Cony	Wood-saprotroph WR		Martinique	ITS sequencing	ITS-BRFM 2419
2420	Fuscoporia sp.	Fuscoporia Murrill	Hymenochaetaceae, Hymenochaetales, Agaricomycetes, Basidiomycota		CD 55865	DECOCK Cony		DECOCK Cony	DECOCK Cony	Wood-saprotroph WR		Martinique	ITS sequencing	ITS-BRFM 2420
2422	Fomitopsis sp.	Fomitopsis P. Karst.	Fomitopsidaceae, Polyporales, Agaricomycetes, Basidiomycota		CD 55849	DECOCK Cony		DECOCK Cony	DECOCK Cony	Wood-saprotroph WR		Martinique	ITS sequencing	ITS-BRFM 2422
2423	Flavodon flavus	Flavodon flavus (Klotzsch) Ryvarden	Meruliaceae, Polyporales, Agaricomycetes, Basidiomycota		CD 55860	DECOCK Cony		DECOCK Cony	DECOCK Cony	Wood-saprotroph WR	Sentier cascade Anse couleuvre Le Precheur	Martinique	ITS sequencing	ITS-BRFM 2423
2424	Coriolopsis sp.	Coriolopsis Murrill	Polyporaceae, Polyporales, Agaricomycetes, Basidiomycota		CD 55634	DECOCK Cony		DECOCK Cony	DECOCK Cony	Wood-saprotroph WR		French Guiana	ITS sequencing	ITS-BRFM 2424
2425	Coriolopsis sp.	Coriolopsis Murrill	Polyporaceae, Polyporales, Agaricomycetes, Basidiomycota		CD 55854	DECOCK Cony		DECOCK Cony	DECOCK Cony	Wood-saprotroph WR		Martinique	ITS sequencing	ITS-BRFM 2425
2426	Coriolopsis caperata	Coriolopsis caperata (Berk.) Murrill	Polyporaceae, Polyporales, Agaricomycetes, Basidiomycota		CD 55856	DECOCK Cony		DECOCK Cony	DECOCK Cony	Wood-saprotroph WR		Martinique	ITS sequencing	ITS-BRFM 2426
2427	Rigidoporus sp.	Rigidoporus Murrill	Meripilaceae, Polyporales, Agaricomycetes, Basidiomycota		CD 55829	DECOCK Cony		DECOCK Cony	DECOCK Cony	Wood-saprotroph WR		Martinique	ITS sequencing	ITS-BRFM 2427
2428	Rigidoporus sp.	Rigidoporus Murrill	Meripilaceae, Polyporales, Agaricomycetes, Basidiomycota		CD 55828	DECOCK Cony		DECOCK Cony	DECOCK Cony	Wood-saprotroph WR		Martinique	ITS sequencing	ITS-BRFM 2428
2429	Ganoderma sp.	Ganoderma P. Karst.	Ganodermataceae, Polyporales, Agaricomycetes, Basidiomycota		CD 55794	DECOCK Cony		DECOCK Cony	DECOCK Cony	Wood-saprotroph WR		French Guiana	ITS sequencing	ITS-BRFM 2429
2430	Ganoderma sp.	Ganoderma P. Karst.	Ganodermataceae, Polyporales, Agaricomycetes, Basidiomycota		CD 55626	DECOCK Cony		DECOCK Cony	DECOCK Cony	Wood-saprotroph WR		French Guiana	ITS sequencing	ITS-BRFM 2430
2431	Fulvifomes sp.	Fulvifomes Murrill	Hymenochaetaceae, Hymenochaetales, Agaricomycetes, Basidiomycota		CD 55623	DECOCK Cony		DECOCK Cony	DECOCK Cony	Wood-saprotroph WR		French Guiana	ITS sequencing	ITS-BRFM 2431
2432	Fulvifomes sp.	Fulvifomes Murrill	Hymenochaetaceae, Hymenochaetales, Agaricomycetes, Basidiomycota		CD 55795	DECOCK Cony		DECOCK Cony	DECOCK Cony	Wood-saprotroph WR		French Guiana	ITS sequencing	ITS-BRFM 2432
2433	Amauroderma sp.	Amauroderma Murrill	Ganodermataceae, Polyporales, Agaricomycetes, Basidiomycota		CD 55665	DECOCK Cony		DECOCK Cony	DECOCK Cony	Wood-saprotroph WR		French Guiana	ITS sequencing	ITS-BRFM 2433
2434	Amauroderma sp.	Amauroderma Murrill	Ganodermataceae, Polyporales, Agaricomycetes, Basidiomycota		CD 55659	DECOCK Cony		DECOCK Cony	DECOCK Cony	Wood-saprotroph WR		French Guiana	ITS sequencing	ITS-BRFM 2434
2435	Amauroderma sp.	Amauroderma Murrill	Ganodermataceae, Polyporales, Agaricomycetes, Basidiomycota		CD 55629	DECOCK Cony		DECOCK Cony	DECOCK Cony	Wood-saprotroph WR		French Guiana	ITS sequencing	ITS-BRFM 2435
2436	Amauroderma sp.	Amauroderma Murrill	Ganodermataceae, Polyporales, Agaricomycetes, Basidiomycota		CD 55628	DECOCK Cony		DECOCK Cony	DECOCK Cony	Wood-saprotroph WR		French Guiana	ITS sequencing	ITS-BRFM 2436
2437	Amauroderma sp.	Amauroderma Murrill	Ganodermataceae, Polyporales, Agaricomycetes, Basidiomycota		CD 55625	DECOCK Cony		DECOCK Cony	DECOCK Cony	Wood-saprotroph WR		French Guiana	ITS sequencing	ITS-BRFM 2437
2438	Amauroderma sp.	Amauroderma Murrill	Ganodermataceae, Polyporales, Agaricomycetes, Basidiomycota		CD 55624	DECOCK Cony		DECOCK Cony	DECOCK Cony	Wood-saprotroph WR		French Guiana	ITS sequencing	ITS-BRFM 2438
2439	Amauroderma sp.	Amauroderma Murrill	Ganodermataceae, Polyporales, Agaricomycetes, Basidiomycota		CD 55620	DECOCK Cony		DECOCK Cony	DECOCK Cony	Wood-saprotroph WR		French Guiana	ITS sequencing	ITS-BRFM 2439
2441	Amphinema sp.	Amphinema P. Karst.	Atheliaceae, Atheliales, Agaricomycetes, Basidiomycota		CD 55616	DECOCK Cony		DECOCK Cony	DECOCK Cony	Wood-saprotroph		French Guiana	ITS sequencing	ITS-BRFM 2441
2442	Porogramme sp.	Porogramme (Pat.) Pat.	Polyporaceae, Polyporales, Agaricomycetes, Basidiomycota		CD 55842	DECOCK Cony	CD 55842	DECOCK Cony	DECOCK Cony	Wood-saprotroph WR		Martinique	ITS sequencing	ITS-BRFM 2442
2443	Rhizoctonia solani	Rhizoctonia solani J.G. Kühn	Ceratobasidiaceae, Cantharellales, Agaricomycetes, Basidiomycota		AG 2-2	MOUGIN Christian				Plant-pathogen		France	ITS sequencing	ITS-BRFM 2443
2445	Pycnoporus cinnabarinus	Pycnoporus cinnabarinus (Jacq.) P. Karst.	Polyporaceae, Polyporales, Agaricomycetes, Basidiomycota		BRFM 145, I-937	MOUGIN Christian				Wood-saprotroph WR		France	ITS sequencing	ITS-BRFM 2445
2446	Fusarium culmorum	Fusarium culmorum (Wm.G. Sm.) Sacc.	Nectriaceae, Hypocreales, Sordariomycetes, Ascomycota		MIAE OO688	MOUGIN Christian				Plant-pathogen		France	ITS sequencing	ITS-BRFM 2446
2447	Mortierella alpina	Mortierella alpina Peyronel	Mortierellaceae, Mortierellales, Mortierellomycetes, Mucuromycota		MIAE 08-007	MOUGIN Christian				Not determined		France	ITS sequencing	ITS-BRFM 2447
2448	Fusarium oxysporum	Fusarium oxysporum Schltdl.	Nectriaceae, Hypocreales, Sordariomycetes, Ascomycota		FGSC 9935	MOUGIN Christian				Plant-pathogen	Tomato (isolated in 1984)	Spain	ITS sequencing	ITS-BRFM 2448
2449	Fusarium oxysporum	Fusarium oxysporum Schltdl.	Nectriaceae, Hypocreales, Sordariomycetes, Ascomycota		CHL 47	MOUGIN Christian				Plant-pathogen		France	ITS sequencing	ITS-BRFM 2449
2450	Fusarium oxysporum	Fusarium oxysporum Schltdl.	Nectriaceae, Hypocreales, Sordariomycetes, Ascomycota		BB63	MOUGIN Christian				Plant-pathogen		France	ITS sequencing	ITS-BRFM 2450
2451	Fusarium sp.	Fusarium Link	Nectriaceae, Hypocreales, Sordariomycetes, Ascomycota		PB2	MOUGIN Christian				Plant-pathogen		France	ITS sequencing	ITS-BRFM 2451
2452	Trichoderma sp.	Trichoderma Pers.	Hypocreaceae, Hypocreales, Sordariomycetes, Ascomycota		MIAE 0696	MOUGIN Christian				Not determined		France	ITS sequencing	ITS-BRFM 2452
2453	Fusarium oxysporum	Fusarium oxysporum Schltdl.	Nectriaceae, Hypocreales, Sordariomycetes, Ascomycota		MIAE Fo47	MOUGIN Christian				Plant-pathogen		France	ITS sequencing	ITS-BRFM 2453
2454	Rhizoctonia solani	Rhizoctonia solani J.G. Kühn	Ceratobasidiaceae, Cantharellales, Agaricomycetes, Basidiomycota		MIAE 00060	MOUGIN Christian				Plant-pathogen		France	ITS sequencing	ITS-BRFM 2454
2455	Inonotus sp.	Inonotus P. Karst.	Hymenochaetaceae, Hymenochaetales, Agaricomycetes, Basidiomycota		CD 55920	DECOCK Cony		DECOCK Cony	DECOCK Cony	Wood-saprotroph		Martinique	ITS sequencing	ITS-BRFM 2455
2456	Fulvifomes sp.	Fulvifomes Murrill	Hymenochaetaceae, Hymenochaetales, Agaricomycetes, Basidiomycota		CD 55922	DECOCK Cony		DECOCK Cony	DECOCK Cony	Wood-saprotroph WR		Martinique	ITS sequencing	ITS-BRFM 2456
2457	Fulvifomes sp.	Fulvifomes Murrill	Hymenochaetaceae, Hymenochaetales, Agaricomycetes, Basidiomycota		CD 55921	DECOCK Cony		DECOCK Cony	DECOCK Cony	Wood-saprotroph WR		Martinique	ITS sequencing	ITS-BRFM 2457
2458	Fuscoporia sp.	Fuscoporia Murrill	Hymenochaetaceae, Hymenochaetales, Agaricomycetes, Basidiomycota		CD 55912	DECOCK Cony		DECOCK Cony	DECOCK Cony	Wood-saprotroph		Martinique	ITS sequencing	ITS-BRFM 2458
2459	Metacordyceps chlamydosporia	Metacordyceps chlamydosporia (H.C. Evans) G.H. Sung	Clavicipitaceae, Hypocreales, Sordariomycetes, Ascomycota		CD 55917	DECOCK Cony		DECOCK Cony	DECOCK Cony	Entomo-pathogen		Martinique	ITS sequencing	ITS-BRFM 2459
2460	Oligoporus wakefieldiae	Oligoporus wakefieldiae (Kotl. & Pouzar) Ryvarden & Melo	Dacryobolaceae, Polyporales, Agaricomycetes, Basidiomycota		MUCL 56286	DECOCK Cony		DECOCK Cony	DECOCK Cony	Wood-saprotroph BR	lumber, Normandie, Bayeux, habitation	Normandie, Bayeux, France	ITS sequencing	ITS-BRFM 2460
2462	Penicillium freii	Penicillium freii Frisvad & Samson	Aspergillaceae, Eurotiales, Eurotiomycetes, Ascomycota		MIAE 00382	MOUGIN Christian				Saprotroph SR		France	ITS sequencing	ITS-BRFM 2462
2463	Absidia glauca	Absidia glauca Hagem	Cunninghamellaceae, Mucorales, Mucuromycetes, Mucuromycota		MIAE 00377	MOUGIN Christian				Not determined		France	ITS sequencing	ITS-BRFM 2463
2464	Mucor circinelloides	Mucor circinelloides Tiegh.	Mucoraceae, Mucorales, Mucuromycetes, Mucuromycota		PSN119	MOUGIN Christian				Not determined		France	ITS sequencing	ITS-BRFM 2464
2465	Mucor hiemalis	Mucor hiemalis Wehmer	Mucoraceae, Mucorales, Mucuromycetes, Mucuromycota		MIAE 08 009	MOUGIN Christian				Not determined		France	ITS sequencing	ITS-BRFM 2465
2466	Mucor hiemalis	Mucor hiemalis Wehmer	Mucoraceae, Mucorales, Mucuromycetes, Mucuromycota		BB4	MOUGIN Christian				Not determined		France	ITS sequencing	ITS-BRFM 2466
2467	Mucor sp.	Mucor Fresen.	Mucoraceae, Mucorales, Mucuromycetes, Mucuromycota		MIAE 08 00X	MOUGIN Christian				Not determined		France	ITS sequencing	ITS-BRFM 2467
2468	Thanatephorus cucumeris	Thanatephorus cucumeris (A.B. Frank) Donk	Ceratobasidiaceae, Cantharellales, Agaricomycetes, Basidiomycota		MIAE 08 006	MOUGIN Christian				Plant-pathogen		France	ITS sequencing	ITS-BRFM 2468
2469	Trichoderma sp.	Trichoderma Pers.	Hypocreaceae, Hypocreales, Sordariomycetes, Ascomycota		MIAE Vert 1	MOUGIN Christian				Not determined		France	ITS sequencing	ITS-BRFM 2469
2470	Fomitiporia mediterranea	Fomitiporia mediterranea M. Fisch.	Hymenochaetaceae, Hymenochaetales, Agaricomycetes, Basidiomycota			NAVARRO David	ROQ 17-02	BERRIN Jean-Guy	NAVARRO David	Wood-saprotroph WR	wooden fence, Lascours	Bouches du Rhone, Roquevaire, France	ITS sequencing	ITS-BRFM 2470
2471	Poronia sp.	Poronia Willd.	Xylariaceae, Xylariales, Sordariomycetes, Ascomycota		JF16067	LECHAT Christian		FOURNIER Jacques		Coprophilous	Horse dung, Nord, Ghywelde	Nord, Ghyvelde, France	ITS sequencing	ITS-BRFM 2471
2472	Poronia sp.	Poronia Willd.	Xylariaceae, Xylariales, Sordariomycetes, Ascomycota		MH091215	LECHAT Christian				Coprophilous	Rabbit dung (crottes de lapin), Les Portes-en-Re, Trousse Chemise	France	ITS sequencing	ITS-BRFM 2472
2474	Pleospora leptosphaerulinoides	Pleospora leptosphaerulinoides Crivelli	Pleosporaceae, Pleosporales, Dothideomycetes, Ascomycota		CLL17098	LECHAT Christian		LECHAT Christian	LECHAT Christian	Not determined	Humulus (houblon)	Spain	ITS sequencing	ITS-BRFM 2474
2475	Nectria balansae	Nectria balansae Speg.	Nectriaceae, Hypocreales, Sordariomycetes, Ascomycota		CLL17011	LECHAT Christian		LECHAT Christian	LECHAT Christian	Not determined	Bark of Ficus, Poivendre de Marigny	Deux-Sèvres, Marigny, France	ITS sequencing	ITS-BRFM 2475
2476	Pseudopronectria oligospora	Pronectria oligospora Lowen & Rogerson	Nectriaceae, Hypocreales, Sordariomycetes, Ascomycota		AG17007	LECHAT Christian				Not determined	Punctelia subrudecta (ascomycete), Veronnes	Côte-d'Or, Veronnes, France	ITS sequencing	ITS-BRFM 2476
2477	Chrysonectria finisterensis	Chrysonectria finisterrensis Lechat	Nectriaceae, Hypocreales, Sordariomycetes, Ascomycota		JPP17021	LECHAT Christian				Not determined	Bark of Quercus, Clohars-Carnoet	Finistère, Clohars-Carnoët, France	ITS sequencing	ITS-BRFM 2477
2478	Verticillium sp.	Verticillium Nees	Hypocreaceae, Hypocreales, Sordariomycetes, Ascomycota		ACR 17-03	HAON Mireille		HAON Mireille	HAON Mireille	Not determined	Acrylamide gel, UMR BBF, laboratoire de biochimie	Bouches du Rhone, Marseille, France	ITS sequencing	ITS-BRFM 2478
2506	Nectriella jucunda	Nectriella jucunda (Mont.) Sacc.	Bionectriaceae, Hypocreales, Sordariomycetes, Ascomycota		AG17030	LECHAT Christian				Not determined	Escola profissional agricola de carvalhais, Mirandela	Portugal	ITS sequencing	ITS-BRFM 2506
2507	Nectria balansae	Nectria balansae Speg.	Nectriaceae, Hypocreales, Sordariomycetes, Ascomycota		CLL 17008	LECHAT Christian		LECHAT Christian	LECHAT Christian	Not determined	Robinia, Poivendre de Marigny	Deux-Sèvres, Marigny, France	ITS sequencing	ITS-BRFM 2507
2508	Bionectria sporodochialis	Bionectria sporodochialis Schroers	Bionectriaceae, Hypocreales, Sordariomycetes, Ascomycota		CLL17012	LECHAT Christian		LECHAT Christian	LECHAT Christian	Not determined	bark	Vietnam	ITS sequencing	ITS-BRFM 2508
2509	Dialonectria sp.	Dialonectria (Sacc.) Cooke	Nectriaceae, Hypocreales, Sordariomycetes, Ascomycota		CLL17017	LECHAT Christian		LECHAT Christian	LECHAT Christian	Fungi-parasitic	Eutypella quarternata (champignon Xylariale)	Somiedo, Spain	ITS sequencing	ITS-BRFM 2509
2510	Dialonectria sp.	Dialonectria (Sacc.) Cooke	Nectriaceae, Hypocreales, Sordariomycetes, Ascomycota		CLL17016	LECHAT Christian		LECHAT Christian	LECHAT Christian	Fungi-parasitic	Diatrypaceae (Xylariales)	Somiedo, Spain	ITS sequencing	ITS-BRFM 2510
2511	Ijuhya aurantiaca	Ijuhya aurantiaca Lechat & J. Fourn.	Bionectriaceae, Hypocreales, Sordariomycetes, Ascomycota		CLL17006	LECHAT Christian		LECHAT Christian	LECHAT Christian	Not determined	Humulus (houblon)	Spain	ITS sequencing	ITS-BRFM 2511
2512	Metarhizium robertsii	Metarhizium robertsii J.F. Bisch.	Clavicipitaceae, Hypocreales, Sordariomycetes, Ascomycota		EF 3.5 (1)	THIERY Denis (UMR SAVE)				Entomo-pathogen	insect: Lobesia botrana, Campus INRA Villenave d'Ornon, Sol viticole	Aquitaine, France	ITS sequencing	ITS-BRFM 2512
2513	Metarhizium robertsii	Metarhizium robertsii J.F. Bisch.	Clavicipitaceae, Hypocreales, Sordariomycetes, Ascomycota		EF3.5 (2)	THIERY Denis (UMR SAVE)				Entomo-pathogen	insect: Lobesia botrana, Campus INRA Villenave d'Ornon, Sol viticole	Aquitaine, France	ITS sequencing	ITS-BRFM 2513
2514	Metarhizium robertsii	Metarhizium robertsii J.F. Bisch.	Clavicipitaceae, Hypocreales, Sordariomycetes, Ascomycota		EF 3.5 (3)	THIERY Denis (UMR SAVE)				Entomo-pathogen	insect: Lobesia botrana, Campus INRA Villenave d'Ornon, Sol viticole	Aquitaine, France	ITS sequencing	ITS-BRFM 2514
2515	Metarhizium robertsii	Metarhizium robertsii J.F. Bisch.	Clavicipitaceae, Hypocreales, Sordariomycetes, Ascomycota		EF2.5 (2)	THIERY Denis (UMR SAVE)				Entomo-pathogen	insect: Lobesia botrana, Campus INRA Villenave d'Ornon, Sol viticole	Aquitaine, France	ITS sequencing	ITS-BRFM 2515
2516	Pseudomicrostroma juglandis	Pseudomicrostroma juglandis (Berenger) T. Kij. & Aime	Microstromataceae, Microstromatales, Exobasidiomycetes, Basidiomycota		MUCL 56484	DECOCK Cony		DECOCK Cony	DECOCK Cony	Plant-pathogen	Walnut living leaf, Garden	Côtes-d'Armor, Île-de-Bréhat, France	ITS sequencing	ITS-BRFM 2516
2517	Blastobotrys sp.	Blastobotrys Klopotek	Trichomonascaceae, Saccharomycetales, Saccharomycetes, Ascomycota		MUCL 56485	DECOCK Cony		DECOCK Cony	DECOCK Cony	Not determined	decaying basidiome , cellar of house	Maine-et-Loire, Sermaise, France	ITS sequencing	ITS-BRFM 2517
2518	Laetiporus sulphureus	Laetiporus sulphureus (Bull.) Murrill	Fomitopsidaceae, Polyporales, Agaricomycetes, Basidiomycota		MUCL 56531	DECOCK Cony		DECOCK Cony	DECOCK Cony	Wood-saprotroph BR	living chestnut trunk, Lieu-dit Bussac, ravin du Bois d Hubert, prairie de moyenne montagne	Cantal, Massiac, France	ITS sequencing	ITS-BRFM 2518
2519	Perenniporia meridionalis	Perenniporia meridionalis Decock & Stalpers	Polyporaceae, Polyporales, Agaricomycetes, Basidiomycota		MUCL 56532	DECOCK Cony		DECOCK Cony	DECOCK Cony	Wood-saprotroph WR	old Quercus beam on the ground , Garden, lieu-dit Bussac	Cantal, Massiac, France	ITS sequencing	ITS-BRFM 2519
2520	Ganoderma lucidum	Ganoderma lucidum (Curtis) P. Karst.	Ganodermataceae, Polyporales, Agaricomycetes, Basidiomycota		MUCL 56533	DECOCK Cony		DECOCK Cony	DECOCK Cony	Wood-saprotroph WR	Quercus stump, Ravin du Bois d Hubert, prairie, moyenne montagne	France	ITS sequencing	ITS-BRFM 2520
2521	Aspergillus sydowii	Aspergillus sydowii (Bainier & Sartory) Thom & Church	Aspergillaceae, Eurotiales, Eurotiomycetes, Ascomycota			NAVARRO David	MEG-17-02	NAVARRO David	NAVARRO David	Saprotroph SR	cigarette stub, Recyclop collection	Bouches du Rhone, Marseille, France	ITS sequencing	ITS-BRFM 2521
2522	Rhinocladiella similis	Rhinocladiella similis de Hoog & Caligiorne	Herpotrichiellaceae, Chaetothyriales, Eurotiomycetes, Ascomycota			TAUSSAC Sabine	LAB-17-01	TAUSSAC Sabine	TAUSSAC Sabine	Not determined	Contaminant on characterization plate, UMR BBF, laboratoire de biochimie	Bouches du Rhone, Marseille, France	ITS sequencing	ITS-BRFM 2522
2523	Lasionectriopsis germanica	Lasionectriopsis germanica Lechat	Nectriaceae, Hypocreales, Sordariomycetes, Ascomycota		CLL17022	LECHAT Christian		LECHAT Christian	LECHAT Christian	Wood-saprotroph	Fagus (hetre), Monchengladbach	Germany	ITS sequencing	ITS-BRFM 2523
2524	Neocosmospora haematococca	Neocosmospora haematococca (Berk. & Broome) Samuels	Nectriaceae, Hypocreales, Sordariomycetes, Ascomycota		CLL17025	LECHAT Christian		LECHAT Christian	LECHAT Christian	Plant-pathogen	old remnants of sugar beet, Luttelforst	Germany	ITS sequencing	ITS-BRFM 2524
2525	Thelonectria ariegensis	Thelonectria P. Chaverri & C. Salgado	Nectriaceae, Hypocreales, Sordariomycetes, Ascomycota		JF17067	LECHAT Christian		FOURNIER Jacques		Wood-saprotroph	Robinia bark, La Maille, Rimont	Ariège, Rimont, France	ITS sequencing	ITS-BRFM 2525
2526	Lentinus tigrinus	Lentinus tigrinus (Bull.) Fr.	Polyporaceae, Polyporales, Agaricomycetes, Basidiomycota		CMPG 1664	SAGE Lucile				Wood-saprotroph WR	wood, Forest Aiguebelette	Savoie, Aiguebelette-le-Lac, France	ITS sequencing	ITS-BRFM 2526
2527	Stereum sp.	Stereum Hill ex Pers.	Stereaceae, Russulales, Agaricomycetes, Basidiomycota		CMPG 1679	SAGE Lucile				Wood-saprotroph	on decideous tree, Massif de Belledonne, lac de Freydieres	Isère, Revel, France	ITS sequencing	ITS-BRFM 2527
2528	Fomitopsis pinicola	Fomitopsis pinicola (Sw.) P. Karst.	Fomitopsidaceae, Polyporales, Agaricomycetes, Basidiomycota		CMPG 1685	SAGE Lucile				Wood-saprotroph BR	on softwood, ski station of Prapoutel	Isère, Prapoutel, France	ITS sequencing	ITS-BRFM 2528
2529	Gloeophyllum sepiarium	Gloeophyllum sepiarium (Wulfen) P. Karst.	Gloeophyllaceae, Gloeophyllales, Agaricomycetes, Basidiomycota		CMPG 1690	SAGE Lucile				Wood-saprotroph BR	wood, Massif de Belledonne, Lac de Freydieres	Isère, Revel, France	ITS sequencing	ITS-BRFM 2529
2530	Abortiporus biennis	Abortiporus biennis (Bull.) Singer	Meruliaceae, Polyporales, Agaricomycetes, Basidiomycota		CMPG 1698	SAGE Lucile				Plant-pathogen WR	lawn, campus de saint Martin d Heres	Isère, Saint-Martin-d'Hères, France	ITS sequencing	ITS-BRFM 2530
2531	Pholiota squarrosa	Pholiota squarrosa (Oeder) P. Kumm.	Strophariaceae, Agaricales, Agaricomycetes, Basidiomycota		CMPG 1713	SAGE Lucile				Wood-saprotroph	on wood, campus Saint Martin d Heres	Isère, Saint-Martin-d'Hères, France	ITS sequencing	ITS-BRFM 2531
2532	Lyophyllum sp.	Lyophyllum P. Karst.	Lyophyllaceae, Agaricales, Agaricomycetes, Basidiomycota		CMPG 1715	SAGE Lucile				Wood-saprotroph	on wood, campus de Saint Martin d Heres	Isère, Saint-Martin-d'Hères, France	ITS sequencing	ITS-BRFM 2532
2533	Fomitopsis pinicola	Fomitopsis pinicola (Sw.) P. Karst.	Fomitopsidaceae, Polyporales, Agaricomycetes, Basidiomycota		CMPG 1737	SAGE Lucile				Wood-saprotroph BR	on softwood, Prapoutel	Isère, Prapoutel, France	ITS sequencing	ITS-BRFM 2533
2534	Pycnoporus cinnabarinus	Pycnoporus cinnabarinus (Jacq.) P. Karst.	Polyporaceae, Polyporales, Agaricomycetes, Basidiomycota		CMPG 1749	SAGE Lucile				Wood-saprotroph WR	on wood, Massif de Belledonne Lac de Freydieres	Isère, Revel, France	ITS sequencing	ITS-BRFM 2534
2535	Daedaleopsis confragosa var. tricolor	Daedaleopsis confragosa var. tricolor (Bull.) Bondartsev & Sing…	Polyporaceae, Polyporales, Agaricomycetes, Basidiomycota		CMPG 1781	SAGE Lucile				Wood-saprotroph WR	on wood, Forest of Belleme, Orne	Orne, Bellême, France	ITS sequencing	ITS-BRFM 2535
2536	Terana caerulea	Terana caerulea (Schrad. ex Lam.) Kuntze	Phanerochaetaceae, Polyporales, Agaricomycetes, Basidiomycota		CMPG 1790	SAGE Lucile				Wood-saprotroph	on wood, Chambery, Savoie	Savoie, Chamberry, France	ITS sequencing	ITS-BRFM 2536
2538	Abortiporus biennis	Abortiporus biennis (Bull.) Singer	Meruliaceae, Polyporales, Agaricomycetes, Basidiomycota		CMPG 1833	SAGE Lucile				Plant-pathogen WR	on wood, Forest of Belleme, Orne	Orne, Bellême, France	ITS sequencing	ITS-BRFM 2538
2539	Stereum sp.	Stereum Hill ex Pers.	Stereaceae, Russulales, Agaricomycetes, Basidiomycota		CMPG 1845	SAGE Lucile				Wood-saprotroph	Forest, Vosges Nancy (reunion Stolon)	Vosges, France	ITS sequencing	ITS-BRFM 2539
2540	Pleurotus ostreatus	Pleurotus ostreatus (Jacq.) P. Kumm.	Pleurotaceae, Agaricales, Agaricomycetes, Basidiomycota		CMPG 1894	SAGE Lucile				Wood-saprotroph WR	on trunk, Saint Martin d Heres	Isère, Saint-Martin-d'Hères, France	ITS sequencing	ITS-BRFM 2540
2541	Pleurotus ostreatus	Pleurotus ostreatus (Jacq.) P. Kumm.	Pleurotaceae, Agaricales, Agaricomycetes, Basidiomycota		CMPG 2103	SAGE Lucile				Wood-saprotroph WR	poplar, campus de Saint Martin d Heres	Isère, Saint-Martin-d'Hères, France	ITS sequencing	ITS-BRFM 2541
2542	Daedaleopsis confragosa var. tricolor	Daedaleopsis confragosa var. tricolor (Bull.) Bondartsev & Sing…	Polyporaceae, Polyporales, Agaricomycetes, Basidiomycota		CMPG 2141	SAGE Lucile				Wood-saprotroph WR	on decideous tree	Isère, Le Grand-Lemps, France	ITS sequencing	ITS-BRFM 2542
2543	Schizophyllum commune	Schizophyllum commune Fr.	Schizophyllaceae, Agaricales, Agaricomycetes, Basidiomycota		CMPG 2165	SAGE Lucile				Wood-saprotroph WR	PCB-polluted soil	France	ITS sequencing	ITS-BRFM 2543
2544	Irpex lacteus	Irpex lacteus (Fr.) Fr.	Irpicaceae, Polyporales, Agaricomycetes, Basidiomycota		CMPG 2179	SAGE Lucile				Wood-saprotroph WR	PCB-polluted soil	France	ITS sequencing	ITS-BRFM 2544
2545	Fomes fomentarius	Fomes fomentarius (L.) Fr.	Polyporaceae, Polyporales, Agaricomycetes, Basidiomycota		CMPG 2201	SAGE Lucile				Wood-saprotroph WR	fetuque not mowed	Lautaret, France	ITS sequencing	ITS-BRFM 2545
2546	Trametes versicolor	Trametes versicolor (L.) Lloyd	Polyporaceae, Polyporales, Agaricomycetes, Basidiomycota		CMPG 2202	SAGE Lucile				Wood-saprotroph WR	sediment, Port du Havre, Seine martime	Seine-Maritime, Le Havre, France	ITS sequencing	ITS-BRFM 2546
2547	Ganoderma resinaceum	Ganoderma resinaceum Boud.	Ganodermataceae, Polyporales, Agaricomycetes, Basidiomycota		CMPG 2224	SAGE Lucile				Wood-saprotroph WR	Magnetic fraction of sediments	Loire, Chateauneuf , France	ITS sequencing	ITS-BRFM 2547
2548	Perenniporia fraxinea	Perenniporia fraxinea (Bull.) Ryvarden	Polyporaceae, Polyporales, Agaricomycetes, Basidiomycota		CMPG 2229	SAGE Lucile				Wood-saprotroph WR	Magnetic fraction of sediments	Loire, Chateauneuf , France	ITS sequencing	ITS-BRFM 2548
2549	Pycnoporus sanguineus	Pycnoporus sanguineus (L.) Murrill	Polyporaceae, Polyporales, Agaricomycetes, Basidiomycota		CMPG 2251	SAGE Lucile				Wood-saprotroph WR	on wood, Forest	Guadeloupe, Marie-Galante, Guadeloupe	ITS sequencing	ITS-BRFM 2549
2550	Pycnoporus sanguineus	Pycnoporus sanguineus (L.) Murrill	Polyporaceae, Polyporales, Agaricomycetes, Basidiomycota		CMPG 2253	SAGE Lucile				Wood-saprotroph WR	on decideous tree, Forest	Marie-Galante, Guadeloupe	ITS sequencing	ITS-BRFM 2550
2551	Coprinellus verrucispermus	Coprinellus verrucispermus (Joss. & Enderle) Redhead	Psathyrellaceae, Agaricales, Agaricomycetes, Basidiomycota		CMPG 1870	SAGE Lucile				Wood-saprotroph	on sediment with PCBs, LECA Saint Martin d Heres	Isère, France	ITS sequencing	ITS-BRFM 2551
2552	Coprinus sp.	Coprinus Pers.	Coprinaceae, Agaricales, Agaricomycetes, Basidiomycota		CMPG 1846	SAGE Lucile				Not determined	on plaster, bathroom of house	Savoie, France	ITS sequencing	ITS-BRFM 2552
2553	Coprinopsis strossmayeri	Coprinopsis strossmayeri (Schulzer) Redhead	Psathyrellaceae, Agaricales, Agaricomycetes, Basidiomycota		CMPG 2044	SAGE Lucile				Wood-saprotroph	rupees from India	India	ITS sequencing	ITS-BRFM 2553
2554	Coprinopsis strossmayeri	Coprinopsis strossmayeri (Schulzer) Redhead	Psathyrellaceae, Agaricales, Agaricomycetes, Basidiomycota		CMPG 2136	SAGE Lucile				Wood-saprotroph	contaminant, laboratoire LECA	Isère, France	ITS sequencing	ITS-BRFM 2554
2555	Psathyrella candolleana	Psathyrella candolleana (Fr.) Maire	Psathyrellaceae, Agaricales, Agaricomycetes, Basidiomycota		CMPG 2180	SAGE Lucile				Litter-saprotroph	PCB-polluted soil	Hautes Alpes, France	ITS sequencing	ITS-BRFM 2555
2557	Coprinopsis strossmayeri	Coprinopsis strossmayeri (Schulzer) Redhead	Psathyrellaceae, Agaricales, Agaricomycetes, Basidiomycota		CMPG 1915	SAGE Lucile				Wood-saprotroph	paper Tappi	Isère, France	ITS sequencing	ITS-BRFM 2557
2558	Inonotus rickii	Inonotus rickii (Pat.) D.A. Reid	Hymenochaetaceae, Hymenochaetales, Agaricomycetes, Basidiomycota		CMPG 2018	SAGE Lucile				Plant-pathogen	Parc rhumerie	Marie-Galante, Guadeloupe	ITS sequencing	ITS-BRFM 2558
2559	Phaeophlebiopsis peniophoroides	Phaeophlebiopsis peniophoroides (Gilb. & Adask.) Floudas & Hibb…	Meruliaceae, Polyporales, Agaricomycetes, Basidiomycota		CMPG 2178	SAGE Lucile				Not determined	PCB-polluted soil	France	ITS sequencing	ITS-BRFM 2559
2560	Coprinus cordisporus	Coprinus cordisporus T. Gibbs	Coprinaceae, Agaricales, Agaricomycetes, Basidiomycota		CMPG 2218	SAGE Lucile				Coprophilous	garden soil	Isère, France	ITS sequencing	ITS-BRFM 2560
2561	Coprinellus xanthothrix	Coprinellus xanthothrix (Romagn.) Vilgalys	Psathyrellaceae, Agaricales, Agaricomycetes, Basidiomycota		CMPG 2225	SAGE Lucile				Wood-saprotroph	Magnetic fraction of sediment	Loire, Chateauneuf , France	ITS sequencing	ITS-BRFM 2561
2562	Coprinus sp.	Coprinus Pers.	Coprinaceae, Agaricales, Agaricomycetes, Basidiomycota		CMPG 2246	SAGE Lucile				Not determined	flowerpot soil, Saint Martin d Uriage	Isère, France	ITS sequencing	ITS-BRFM 2562
2563	Porogramme albocincta	Porogramme albocincta (Cooke & Massee) J. Lowe	Polyporaceae, Polyporales, Agaricomycetes, Basidiomycota			GRISEL Sacha	GUY 10-52	GRISEL Sacha	GRISEL Sacha	Wood-saprotroph	Kourou, Montagne des singes, foret grande boucle	French Guiana	ITS sequencing	ITS-BRFM 2563
2564	Grammothele subargentea	Grammothele subargentea (Speg.) Rajchenb.	Polyporaceae, Polyporales, Agaricomycetes, Basidiomycota			MOREAU Pierre Arthur	MART 12-39	MOREAU Pierre Arthur	FAVEL Anne	Wood-saprotroph WR	dead wood, La Trinité, Tartane, Bois de Pointe Rouge	Martinique	ITS sequencing	ITS-BRFM 2564
2565	Gibberella sp.	Gibberella Sacc.	Nectriaceae, Hypocreales, Sordariomycetes, Ascomycota		MycSA-INRA 98	FORGET Florence				Plant-pathogen	Corn seeds, Maïze Grain, Cereal, variete Agenor	Tarn-et-Garonne, France	EF1α sequencing	EF1α-BRFM 2565
2566	Gibberella sp.	Gibberella Sacc.	Nectriaceae, Hypocreales, Sordariomycetes, Ascomycota		MycSA-INRA 99	FORGET Florence				Plant-pathogen	Corn seeds, Maïze Grain, Cereal, variete Duraal	Tarn-et-Garonne, France	EF1α sequencing	EF1α-BRFM 2566
2567	Gibberella sp.	Gibberella Sacc.	Nectriaceae, Hypocreales, Sordariomycetes, Ascomycota		MycSA-INRA 100	FORGET Florence				Plant-pathogen	Corn seeds, Maïze Grain, Cereal, variete Duraal	Gers, France	EF1α sequencing	EF1α-BRFM 2567
2568	Fusarium sp.	Fusarium Link	Nectriaceae, Hypocreales, Sordariomycetes, Ascomycota		MycSA-INRA 424	FORGET Florence				Plant-pathogen	Corn seeds, Maïze Grain, Cereal	France	EF1α sequencing	EF1α-BRFM 2568
2569	Fusarium sp.	Fusarium Link	Nectriaceae, Hypocreales, Sordariomycetes, Ascomycota		MycSA-INRA 431	FORGET Florence				Plant-pathogen		France	EF1α sequencing	EF1α-BRFM 2569
2570	Polyporus melanopus	Polyporus melanopus (Pers.) Fr.	Polyporaceae, Polyporales, Agaricomycetes, Basidiomycota		CMPG 1643	SAGE Lucile				Wood-saprotroph WR	decideous wood, Bois Barbu Vercors	Isère, Villard-de-Lans, France	ITS sequencing	ITS-BRFM 2570
2571	Fomitopsis pinicola	Fomitopsis pinicola (Sw.) P. Karst.	Fomitopsidaceae, Polyporales, Agaricomycetes, Basidiomycota		CMPG 1645	SAGE Lucile				Wood-saprotroph BR	decideous wood, Freydieres, Belledonne	Isère, Revel, France	ITS sequencing	ITS-BRFM 2571
2572	Stereum rugosum	Stereum rugosum Pers.	Stereaceae, Russulales, Agaricomycetes, Basidiomycota		CMPG 1665	SAGE Lucile				Wood-saprotroph WR	dead hazelnut, Saint Martin d Uriage	Isère, Saint-Martin-d'Uriage, France	ITS sequencing	ITS-BRFM 2572
2573	Fomes fomentarius	Fomes fomentarius (L.) Fr.	Polyporaceae, Polyporales, Agaricomycetes, Basidiomycota		CMPG 1678	SAGE Lucile				Wood-saprotroph WR	decideous stump, Saint Martin d Heres	Isère, Saint-Martin-d'Hères, France	ITS sequencing	ITS-BRFM 2573
2574	Trametes versicolor	Trametes versicolor (L.) Lloyd	Polyporaceae, Polyporales, Agaricomycetes, Basidiomycota		CMPG 1686	SAGE Lucile				Wood-saprotroph WR	wood, Freydieres, Belledonne	Isère, Revel, France	ITS sequencing	ITS-BRFM 2574
2575	Trametes hirsuta	Trametes hirsuta (Wulfen) Pilát	Polyporaceae, Polyporales, Agaricomycetes, Basidiomycota		CMPG 1697	SAGE Lucile				Wood-saprotroph WR	wood, Freydieres, Belledonne	Isère, Revel, France	ITS sequencing	ITS-BRFM 2575
2576	Trametes versicolor	Trametes versicolor (L.) Lloyd	Polyporaceae, Polyporales, Agaricomycetes, Basidiomycota		CMPG 1701	SAGE Lucile				Wood-saprotroph WR	wood	Isère, Le Grand-Lemps, France	ITS sequencing	ITS-BRFM 2576
2577	Trametes versicolor	Trametes versicolor (L.) Lloyd	Polyporaceae, Polyporales, Agaricomycetes, Basidiomycota		CMPG 1724	SAGE Lucile				Wood-saprotroph WR	cut trunk of Quercus, Brignac la Plaine, Correze	Corrèze, Brignac la Plaine, France	ITS sequencing	ITS-BRFM 2577
2578	Trametes ochracea	Trametes ochracea (Pers.) Gilb. & Ryvarden	Polyporaceae, Polyporales, Agaricomycetes, Basidiomycota		CMPG 1745	SAGE Lucile				Wood-saprotroph WR	wood, Freydieres, Belledonne	Isère, Revel, France	ITS sequencing	ITS-BRFM 2578
2579	Postia stiptica	Postia stiptica (Pers.) Jülich	Fomitopsidaceae, Polyporales, Agaricomycetes, Basidiomycota		CMPG 1747	SAGE Lucile				Wood-saprotroph BR	wood, Freydieres, Belledonne, Isere	Isère, Revel, France	ITS sequencing	ITS-BRFM 2579
2580	Trametes versicolor	Trametes versicolor (L.) Lloyd	Polyporaceae, Polyporales, Agaricomycetes, Basidiomycota		CMPG 1886	SAGE Lucile				Wood-saprotroph WR	on sediment with PCBs, INSA Lyon	Rhône-Alpes, France	ITS sequencing	ITS-BRFM 2580
2581	Coprinellus xanthothrix	Coprinellus xanthothrix (Romagn.) Vilgalys	Psathyrellaceae, Agaricales, Agaricomycetes, Basidiomycota		CMPG 2051	SAGE Lucile				Wood-saprotroph	Chine blue sky paper	France	ITS sequencing	ITS-BRFM 2581
2582	Coprinellus radians	Coprinellus radians (Desm.) Vilgalys	Psathyrellaceae, Agaricales, Agaricomycetes, Basidiomycota		CMPG 2079	SAGE Lucile				Wood-saprotroph	P et G, carton savons, traite B3501300 1700	France	ITS sequencing	ITS-BRFM 2582
2583	Chondrostereum purpureum	Chondrostereum purpureum (Pers.) Pouzar	Cyphellaceae, Agaricales, Agaricomycetes, Basidiomycota		CMPG 2080	SAGE Lucile				Wood-saprotroph WR	soil	Îles Kerguelen, France	ITS sequencing	ITS-BRFM 2583
2584	Coprinellus radians	Coprinellus radians (Desm.) Vilgalys	Psathyrellaceae, Agaricales, Agaricomycetes, Basidiomycota		CMPG 2122	SAGE Lucile				Wood-saprotroph	Shoes : Palladium	Sri Lanka	ITS sequencing	ITS-BRFM 2584
2585	Heterobasidion annosum	Heterobasidion annosum (Fr.) Bref.	Bondarzewiaceae, Russulales, Agaricomycetes, Basidiomycota		CMPG 2133	SAGE Lucile				Plant-pathogen WR	contaminant laboratoire	Isère, France	ITS sequencing	ITS-BRFM 2585
2586	Trametes versicolor	Trametes versicolor (L.) Lloyd	Polyporaceae, Polyporales, Agaricomycetes, Basidiomycota		CMPG 2137	SAGE Lucile				Wood-saprotroph WR	on decideous tree, Forest of Belleme, Orne	Orne, France	ITS sequencing	ITS-BRFM 2586
2587	Trametes gibbosa	Trametes gibbosa (Pers.) Fr.	Polyporaceae, Polyporales, Agaricomycetes, Basidiomycota		CMPG 2138	SAGE Lucile				Wood-saprotroph WR	on decideous tree, Forest of Belleme, Orne	Orne, France	ITS sequencing	ITS-BRFM 2587
2588	Fomes fomentarius	Fomes fomentarius (L.) Fr.	Polyporaceae, Polyporales, Agaricomycetes, Basidiomycota			NAVARRO David	PAR 18-02 A	BERRIN Jean-Guy	NAVARRO David	Wood-saprotroph WR	living decideous tree, Parc Georges Brassens, Garden	Ile-de-France, Paris, France	ITS sequencing	ITS-BRFM 2588
2589	Fomes fomentarius	Fomes fomentarius (L.) Fr.	Polyporaceae, Polyporales, Agaricomycetes, Basidiomycota			NAVARRO David	PAR 18-02 B	BERRIN Jean-Guy	NAVARRO David	Wood-saprotroph WR	living decideous tree, Parc Georges Brassens, Garden	Ile-de-France, Paris, France	ITS sequencing	ITS-BRFM 2589
2590	Bjerkandera adusta	Bjerkandera adusta (Willd.) P. Karst.	Meruliaceae, Polyporales, Agaricomycetes, Basidiomycota			NAVARRO David	ROQ 18-04	BERRIN Jean-Guy	NAVARRO David	Wood-saprotroph WR	Cupressus trunk, Garden	Bouches du Rhone, Roquevaire, France	ITS sequencing	ITS-BRFM 2590
2591	Pseudocosmospora eutypellae	Pseudocosmospora eutypellae C. Herrera & P. Chaverri	Nectriaceae, Hypocreales, Sordariomycetes, Ascomycota		JF18003	LECHAT Christian		FOURNIER Jacques		Fungi-parasitic	Eutypella scoparia (Xylariales), Las Muros, Rimont (28 fevrier 2018)	Ariège, Rimont, France	ITS sequencing	ITS-BRFM 2591
2592	Geejayessia ruscicola		Nectriaceae, Hypocreales, Sordariomycetes, Ascomycota		CLL17029	LECHAT Christian		LECHAT Christian	LECHAT Christian	Wood-saprotroph	Ruscus aculeatus (petit-houx), Carantoir, le Val (30 octobre 2017)	Morbihan, Carentoir, France	ITS sequencing	ITS-BRFM 2592
2593	Geonectria subalpina	Geonectria subalpina Lechat	Bionectriaceae, Hypocreales, Sordariomycetes, Ascomycota		CLL17023	LECHAT Christian		LECHAT Christian	LECHAT Christian	Not determined	soil (terre), Beaufort la Gittaz (Savoie) (29 aout 2017)	Savoie, Beaufort, France	ITS sequencing	ITS-BRFM 2593
2594	Pseudonectria buxii	Pseudonectria buxi (DC.) Seifert	Nectriaceae, Hypocreales, Sordariomycetes, Ascomycota		MUCL 56680	DECOCK Cony		DECOCK Cony	DECOCK Cony	Plant-pathogen	Leaves (Buxus sempervirens), Garden	Ile-de-France, Paris, France	ITS sequencing	ITS-BRFM 2594
2595	Dothiora buxi	Dothiora buxi Jayasiri	Dothioraceae, Dothideales, Dothideomycetes, Ascomycota		MUCL 56681	DECOCK Cony		DECOCK Cony	DECOCK Cony	Plant-pathogen	Leaves (Buxus sempervirens), Garden	Ile-de-France, Paris, France	ITS sequencing	ITS-BRFM 2595
2596	Pseudonectria follicola	Pseudonectria foliicola L. Lombard & Crous	Nectriaceae, Hypocreales, Sordariomycetes, Ascomycota		MUCL 56682	DECOCK Cony		DECOCK Cony	DECOCK Cony	Plant-pathogen	Leaves (Buxus sempervirens), Garden	Ile-de-France, Paris, France	ITS sequencing	ITS-BRFM 2596
2597	Calonectria pseudonaviculata	Calonectria pseudonaviculata (Crous, J.Z. Groenew. & C.F. Hill)	Nectriaceae, Hypocreales, Sordariomycetes, Ascomycota		MUCL 56683	DECOCK Cony		DECOCK Cony	DECOCK Cony	Plant-pathogen	Leaves (Buxus sempervirens), Garden	Ile-de-France, Paris, France	ITS sequencing	ITS-BRFM 2597
2598	Fusarium sp.	Fusarium Link	Nectriaceae, Hypocreales, Sordariomycetes, Ascomycota		MUCL 56784	DECOCK Cony		DECOCK Cony	DECOCK Cony	Plant-pathogen	Leaves (Buxus sempervirens), Garden	Ile-de-France, Paris, France	ITS sequencing	ITS-BRFM 2598
2599	Fusarium sp.	Fusarium Link	Nectriaceae, Hypocreales, Sordariomycetes, Ascomycota		MUCL 56785	DECOCK Cony		DECOCK Cony	DECOCK Cony	Plant-pathogen	Leaves (Buxus sempervirens), Garden	Ile-de-France, Paris, France	ITS sequencing	ITS-BRFM 2599
2600	Fusarium sp.	Fusarium Link	Nectriaceae, Hypocreales, Sordariomycetes, Ascomycota		MUCL 56787	DECOCK Cony		DECOCK Cony	DECOCK Cony	Plant-pathogen	Leaves (Buxus sempervirens), Garden	Ile-de-France, Paris, France	ITS sequencing	ITS-BRFM 2600
2601	Phoma sp.	Phoma Sacc.	Pleosporaceae, Pleosporales, Dothideomycetes, Ascomycota		MUCL 56788	DECOCK Cony		DECOCK Cony	DECOCK Cony	Plant-pathogen	Leaves (Buxus sempervirens), Garden	Ile-de-France, Paris, France	ITS sequencing	ITS-BRFM 2601
2602	Fusarium sp.	Fusarium Link	Nectriaceae, Hypocreales, Sordariomycetes, Ascomycota		MUCL 56790	DECOCK Cony		DECOCK Cony	DECOCK Cony	Plant-pathogen	Leaves (Buxus sempervirens), Garden	Ile-de-France, Paris, France	ITS sequencing	ITS-BRFM 2602
2603	Phoma sp.	Phoma Sacc.	Pleosporaceae, Pleosporales, Dothideomycetes, Ascomycota		MUCL 56792	DECOCK Cony		DECOCK Cony	DECOCK Cony	Plant-pathogen	Leaves (Buxus sempervirens), Garden	Ile-de-France, Paris, France	ITS sequencing	ITS-BRFM 2603
2604	Phoma sp.	Phoma Sacc.	Pleosporaceae, Pleosporales, Dothideomycetes, Ascomycota		MUCL 56793	DECOCK Cony		DECOCK Cony	DECOCK Cony	Plant-pathogen	Leaves (Buxus sempervirens), Garden	Ile-de-France, Paris, France	ITS sequencing	ITS-BRFM 2604
2605	Septoria sp.	Septoria Sacc.	Mycosphaerellaceae, Capnodiales, Dothideomycetes, Ascomycota		MUCL 56794	DECOCK Cony		DECOCK Cony	DECOCK Cony	Plant-pathogen	Leaves (Buxus sempervirens), Garden	Ile-de-France, Paris, France	ITS sequencing	ITS-BRFM 2605
2606	Calonectria pseudonaviculata	Calonectria pseudonaviculata (Crous, J.Z. Groenew. & C.F. Hill)	Nectriaceae, Hypocreales, Sordariomycetes, Ascomycota		MUCL 56795	DECOCK Cony		DECOCK Cony	DECOCK Cony	Plant-pathogen	Leaves (Buxus sempervirens), Garden	Ile-de-France, Paris, France	ITS sequencing	ITS-BRFM 2606
2607	Phoma sp.	Phoma Sacc.	Pleosporaceae, Pleosporales, Dothideomycetes, Ascomycota		MUCL 56796	DECOCK Cony		DECOCK Cony	DECOCK Cony	Plant-pathogen	Leaves (Buxus sempervirens), Garden	Ile-de-France, Paris, France	ITS sequencing	ITS-BRFM 2607
2608	Fusarium sp.	Fusarium Link	Nectriaceae, Hypocreales, Sordariomycetes, Ascomycota		MUCL 56797	DECOCK Cony		DECOCK Cony	DECOCK Cony	Plant-pathogen	Leaves (Buxus sempervirens), Garden	Ile-de-France, Paris, France	ITS sequencing	ITS-BRFM 2608
2609	Fusarium flocciferum	Fusarium flocciferum Corda	Nectriaceae, Hypocreales, Sordariomycetes, Ascomycota		MUCL 56798	DECOCK Cony		DECOCK Cony	DECOCK Cony	Plant-pathogen	Leaves (Buxus sempervirens), Garden	Ile-de-France, Paris, France	ITS sequencing	ITS-BRFM 2609
2610	Phoma aliena	Phoma aliena (Fr.) Aa & Boerema	Pleosporaceae, Pleosporales, Dothideomycetes, Ascomycota		MUCL 56800	DECOCK Cony		DECOCK Cony	DECOCK Cony	Plant-pathogen	Leaves (Buxus sempervirens), Garden	Ile-de-France, Paris, France	ITS sequencing	ITS-BRFM 2610
2611	Fusarium sp.	Fusarium Link	Nectriaceae, Hypocreales, Sordariomycetes, Ascomycota		MUCL 56801	DECOCK Cony		DECOCK Cony	DECOCK Cony	Plant-pathogen	Leaves (Buxus sempervirens), Garden	Ile-de-France, Paris, France	ITS sequencing	ITS-BRFM 2611
2612	Phoma aliena	Phoma aliena (Fr.) Aa & Boerema	Pleosporaceae, Pleosporales, Dothideomycetes, Ascomycota		MUCL 56802	DECOCK Cony		DECOCK Cony	DECOCK Cony	Plant-pathogen	Leaves (Buxus sempervirens), Garden	Ile-de-France, Paris, France	ITS sequencing	ITS-BRFM 2612
2613	Botrytis sp.	Botrytis P. Micheli ex Haller	Sclerotiniaceae, Helotiales, Leotiomycetes, Ascomycota		MUCL 56804	DECOCK Cony		DECOCK Cony	DECOCK Cony	Plant-pathogen	Leaves (Buxus sempervirens), Garden	Ile-de-France, Paris, France	ITS sequencing	ITS-BRFM 2613
2614	Phoma sp.	Phoma Sacc.	Pleosporaceae, Pleosporales, Dothideomycetes, Ascomycota		MUCL 56809	DECOCK Cony		DECOCK Cony	DECOCK Cony	Plant-pathogen	Leaves (Buxus sempervirens), Garden	Ile-de-France, Paris, France	ITS sequencing	ITS-BRFM 2614
2615	Phoma sp.	Phoma Sacc.	Pleosporaceae, Pleosporales, Dothideomycetes, Ascomycota		MUCL 56816	DECOCK Cony		DECOCK Cony	DECOCK Cony	Plant-pathogen	Leaves (Buxus sempervirens), Garden	Ile-de-France, Paris, France	ITS sequencing	ITS-BRFM 2615
2617	Cyclocybe aegerita	Cyclocybe aegerita (V. Brig.) Vizzini	Strophariaceae, Agaricales, Agaricomycetes, Basidiomycota		CMPG 1677	SAGE Lucile				Wood-saprotroph	on poplar, Labo Saint-martin d Heres	Isère, Revel, France	ITS sequencing	ITS-BRFM 2617
2618	Fomitopsis spraguei	Fomitopsis spraguei (Berk. & M.A. Curtis) Gilb. & Ryvarden	Fomitopsidaceae, Polyporales, Agaricomycetes, Basidiomycota		CMPG 1680	SAGE Lucile				Wood-saprotroph BR	Pine stump, golf de Souillac	Lot, Lachapelle-Auzac, France	ITS sequencing	ITS-BRFM 2618
2619	Fomitopsis pinicola	Fomitopsis pinicola (Sw.) P. Karst.	Fomitopsidaceae, Polyporales, Agaricomycetes, Basidiomycota		CMPG 1681	SAGE Lucile				Wood-saprotroph BR	on softwood, Prapoutel	Isère, Revel, France	ITS sequencing	ITS-BRFM 2619
2620	Polyporus brumalis	Polyporus brumalis (Pers.) Fr.	Polyporaceae, Polyporales, Agaricomycetes, Basidiomycota		CMPG 1682	SAGE Lucile				Wood-saprotroph WR	on decideous tree, Freydieres, Belledonne	Isère, Revel, France	ITS sequencing	ITS-BRFM 2620
2621	Gloeophyllum sepiarium	Gloeophyllum sepiarium (Wulfen) P. Karst.	Gloeophyllaceae, Gloeophyllales, Agaricomycetes, Basidiomycota		CMPG 1687	SAGE Lucile				Wood-saprotroph BR	on wood, Freydieres, Belledonne	Isère, Revel, France	ITS sequencing	ITS-BRFM 2621
2622	Gloeophyllum sepiarium	Gloeophyllum sepiarium (Wulfen) P. Karst.	Gloeophyllaceae, Gloeophyllales, Agaricomycetes, Basidiomycota		CMPG 1688	SAGE Lucile				Wood-saprotroph BR	on wood, Freydieres, Belledonne	Isère, Revel, France	ITS sequencing	ITS-BRFM 2622
2623	Gloeophyllum sepiarium	Gloeophyllum sepiarium (Wulfen) P. Karst.	Gloeophyllaceae, Gloeophyllales, Agaricomycetes, Basidiomycota		CMPG 1689	SAGE Lucile				Wood-saprotroph BR	on wood, Freydieres, Belledonne	Isère, Revel, France	ITS sequencing	ITS-BRFM 2623
2624	Fomitopsis pinicola	Fomitopsis pinicola (Sw.) P. Karst.	Fomitopsidaceae, Polyporales, Agaricomycetes, Basidiomycota		CMPG 1692	SAGE Lucile				Wood-saprotroph BR	on wood, Freydieres, Belledonne	Isère, Revel, France	ITS sequencing	ITS-BRFM 2624
2625	Laetiporus sulphureus	Laetiporus sulphureus (Bull.) Murrill	Fomitopsidaceae, Polyporales, Agaricomycetes, Basidiomycota		CMPG 1693	SAGE Lucile				Wood-saprotroph BR	on sculpted wood, Belledonne	Isère, Revel, France	ITS sequencing	ITS-BRFM 2625
2626	Stereum gausapatum	Stereum gausapatum (Fr.) Fr.	Stereaceae, Russulales, Agaricomycetes, Basidiomycota		CMPG 1703	SAGE Lucile				Wood-saprotroph WR	on wood	Isère, Le Grand-Lemps, France	ITS sequencing	ITS-BRFM 2626
2627	Stereum gausapatum	Stereum gausapatum (Fr.) Fr.	Stereaceae, Russulales, Agaricomycetes, Basidiomycota		CMPG 1705	SAGE Lucile				Wood-saprotroph WR	on wood	Isère, Le Grand-Lemps, France	ITS sequencing	ITS-BRFM 2627
2628	Stereum gausapatum	Stereum gausapatum (Fr.) Fr.	Stereaceae, Russulales, Agaricomycetes, Basidiomycota		CMPG 1706	SAGE Lucile				Wood-saprotroph WR	on wood	Isère, Le Grand-Lemps, France	ITS sequencing	ITS-BRFM 2628
2629	Inonotus hispidus	Inonotus hispidus (Bull.) P. Karst.	Hymenochaetaceae, Hymenochaetales, Agaricomycetes, Basidiomycota		CMPG 1714	SAGE Lucile				Wood-saprotroph WR	on wood, Campus Saint Martin d Heres	Isère, Saint-Martin-d'Hères, France	ITS sequencing	ITS-BRFM 2629
2630	Dichomitus squalens	Dichomitus squalens (P. Karst.) D.A. Reid	Polyporaceae, Polyporales, Agaricomycetes, Basidiomycota		CMPG 1731	SAGE Lucile				Wood-saprotroph WR	on burnt softwood, GR 2Corse	Corsica, France	ITS sequencing	ITS-BRFM 2630
2631	Ganoderma adspersum	Ganoderma adspersum (Schulzer) Donk	Ganodermataceae, Polyporales, Agaricomycetes, Basidiomycota		CMPG 1768	SAGE Lucile				Wood-saprotroph WR	Botanic way, Saint Martin d Heres	Isère, Saint-Martin-d'Hères, France	ITS sequencing	ITS-BRFM 2631
2632	Daedaleopsis confragosa	Daedaleopsis confragosa (Bolton) J. Schröt.	Polyporaceae, Polyporales, Agaricomycetes, Basidiomycota		CMPG 1784	SAGE Lucile				Wood-saprotroph WR	Belleme, foret, parcelle 24	Orne, Bellême, France	ITS sequencing	ITS-BRFM 2632
2633	Hyphodermella rosae	Hyphodermella rosae (Bres.) Nakasone	Phanerochaetaceae, Polyporales, Agaricomycetes, Basidiomycota		CMPG 1785	SAGE Lucile				Wood-saprotroph	on blue wood with Pulcherricium	France	ITS sequencing	ITS-BRFM 2633
2634	Trichaptum abietinum	Trichaptum abietinum (Pers. ex J.F. Gmel.) Ryvarden	Polyporaceae, Polyporales, Agaricomycetes, Basidiomycota		CMPG 1830	SAGE Lucile				Wood-saprotroph WR	Vosges, Nancy, reunion Stolon, foret	vosges, France	ITS sequencing	ITS-BRFM 2634
2635	Pycnoporus coccineus	Pycnoporus coccineus (Fr.) Bondartsev & Singer	Polyporaceae, Polyporales, Agaricomycetes, Basidiomycota		CMPG 1831	SAGE Lucile				Wood-saprotroph WR		Australia	ITS sequencing	ITS-BRFM 2635
2636	Stereum hirsutum	Stereum hirsutum (Willd.) Pers.	Stereaceae, Russulales, Agaricomycetes, Basidiomycota		CMPG 1836	SAGE Lucile				Wood-saprotroph WR	wood, Forest of Belleme, Orne	Orne, Bellême, France	ITS sequencing	ITS-BRFM 2636
2637	Phlebia tremellosa	Phlebia tremellosa (Schrad.) Nakasone & Burds.	Meruliaceae, Polyporales, Agaricomycetes, Basidiomycota		CMPG 1844	SAGE Lucile				Wood-saprotroph WR	Vosges, Nancy	Vosges, France	ITS sequencing	ITS-BRFM 2637
2638	Sistotrema brinkmannii	Sistotrema brinkmannii (Bres.) J. Erikss.	Hydnaceae, Cantharellales, Agaricomycetes, Basidiomycota		CMPG 1848	SAGE Lucile				Wood-saprotroph BR	air intake, Normandie	Normandie, France	ITS sequencing	ITS-BRFM 2638
2639	Donkioporia expansa	Donkioporia expansa (Desm.) Kotl. & Pouzar	Gloeophyllaceae, Gloeophyllales, Agaricomycetes, Basidiomycota		CMPG 1852	SAGE Lucile				Wood-saprotroph	air intake, Normandie	Normandie, France	ITS sequencing	ITS-BRFM 2639
2640	Phaeophlebiopsis peniophoroides	Phaeophlebiopsis peniophoroides (Gilb. & Adask.) Floudas & Hibb…	Meruliaceae, Polyporales, Agaricomycetes, Basidiomycota		CMPG 1869	SAGE Lucile				Not determined	ear not mature, fetuque not mowed	France	ITS sequencing	ITS-BRFM 2640
2641	Pycnoporellus fulgens	Pycnoporellus fulgens (Fr.) Donk	Fomitopsidaceae, Polyporales, Agaricomycetes, Basidiomycota		CMPG 1875	SAGE Lucile				Wood-saprotroph	Freydieres	Isère, Revel, France	ITS sequencing	ITS-BRFM 2641
2642	Coprinellus velatopruinatus	Coprinellus velatopruinatus (Bender) Redhead	Psathyrellaceae, Agaricales, Agaricomycetes, Basidiomycota		CMPG 1902	SAGE Lucile				Wood-saprotroph	on sediment with PCBs, INSA Lyon pilote	Rhône, Villeurbanne, France	ITS sequencing	ITS-BRFM 2642
2643	Tyromyces chioneus	Tyromyces chioneus (Fr.) P. Karst.	Polyporaceae, Polyporales, Agaricomycetes, Basidiomycota		CMPG 1917	SAGE Lucile				Wood-saprotroph WR	Epicea, Col de Porte	Isère, France	ITS sequencing	ITS-BRFM 2643
2644	Postia caesia	Postia caesia (Schrad.) P. Karst.	Fomitopsidaceae, Polyporales, Agaricomycetes, Basidiomycota		CMPG 1683	SAGE Lucile				Wood-saprotroph BR	Epicea, Freydieres, Belledonne	Isère, Revel, France	ITS sequencing	ITS-BRFM 2644
2645	Meripilus giganteus	Meripilus giganteus (Pers.) P. Karst.	Meripilaceae, Polyporales, Agaricomycetes, Basidiomycota		CMPG 1783	SAGE Lucile				Wood-saprotroph WR	Golf d'Uriage	Isère, Vaulnaveys-le-Haut, France	ITS sequencing	ITS-BRFM 2645
2646	Coprinellus micaceus	Coprinellus micaceus (Bull.) Vilgalys	Psathyrellaceae, Agaricales, Agaricomycetes, Basidiomycota		CMPG 1887	SAGE Lucile				Wood-saprotroph	on mixed sediment with PCBs, INSA Lyon	Rhône, Villeurbanne, France	ITS sequencing	ITS-BRFM 2646
2647	Agrocybe pediades	Agrocybe pediades (Fr.) Fayod	Strophariaceae, Agaricales, Agaricomycetes, Basidiomycota		CMPG 1892	SAGE Lucile				Wood-saprotroph WR	on mixed sediment with PCBs, LECA Saint Martin d Heres	Isère, Saint-Martin-d'Hères, France	ITS sequencing	ITS-BRFM 2647
2648	Agrocybe praecox	Agrocybe praecox (Pers.) Fayod	Strophariaceae, Agaricales, Agaricomycetes, Basidiomycota		CMPG 1903	SAGE Lucile				Wood-saprotroph WR	Saint Martin d Heres, sous bois CTP	Isère, Saint-Martin-d'Hères, France	ITS sequencing	ITS-BRFM 2648
2649	Agrocybe sp.	Agrocybe Fayod	Strophariaceae, Agaricales, Agaricomycetes, Basidiomycota		CMPG 1905	SAGE Lucile				Wood-saprotroph	Saint Matin d Heres, campus, sentier botanique	Isère, Saint-Martin-d'Hères, France	ITS sequencing	ITS-BRFM 2649
2650	Rhinotrichum lanosum	Rhinotrichum lanosum Cooke	Incertae sedis Ascomycota, Incertae sedis Ascomycota, Incertae sedis Ascomycota, Ascomycota		MUCL 57020	DECOCK Cony		DECOCK Cony	DECOCK Cony	Not determined	House	Seine-Maritime, Le Havre, France	ITS sequencing	ITS-BRFM 2650
2651	Gloeophyllum abietinum	Gloeophyllum abietinum (Bull.) P. Karst.	Gloeophyllaceae, Gloeophyllales, Agaricomycetes, Basidiomycota		MUCL 56820	DECOCK Cony		DECOCK Cony	DECOCK Cony	Wood-saprotroph BR	wood deck, Garden	Calvados, Rouen, France	ITS sequencing	ITS-BRFM 2651
2652	Serpula himantioides	Serpula himantioides (Fr.) P. Karst.	Serpulaceae, Boletales, Agaricomycetes, Basidiomycota		MUCL 57009	DECOCK Cony		DECOCK Cony	DECOCK Cony	Wood-saprotroph BR	Cellar house	Loir-et-Cher, Molineuf, France	ITS sequencing	ITS-BRFM 2652
2653	Coniophora prasinoides	Coniophora prasinoides (Bourdot & Galzin) Bourdot & Galzin	Coniophoraceae, Boletales, Agaricomycetes, Basidiomycota		MUCL 57010	DECOCK Cony		DECOCK Cony	DECOCK Cony	Wood-saprotroph BR	Cellar house	Haute-Garonne, Toulouse, France	ITS sequencing	ITS-BRFM 2653
2654	Thanatephorus cucumeris	Thanatephorus cucumeris (A.B. Frank) Donk	Ceratobasidiaceae, Cantharellales, Agaricomycetes, Basidiomycota		CMPG 2134	SAGE Lucile				Plant-pathogen	PCB-containing sludge, PCB contaminated sludge	France	ITS sequencing	ITS-BRFM 2654
2655	Bjerkandera adusta	Bjerkandera adusta (Willd.) P. Karst.	Meruliaceae, Polyporales, Agaricomycetes, Basidiomycota		CMPG 2139	SAGE Lucile				Wood-saprotroph WR		Orne, Bellême, France	ITS sequencing	ITS-BRFM 2655
2656	Daedalea quercina	Daedalea quercina (L.) Pers.	Fomitopsidaceae, Polyporales, Agaricomycetes, Basidiomycota		CMPG 2140	SAGE Lucile				Wood-saprotroph BR		Isère, Le Grand-Lemps, France	ITS sequencing	ITS-BRFM 2656
2657	Inonotus radiatus	Inonotus radiatus (Sowerby) P. Karst.	Hymenochaetaceae, Hymenochaetales, Agaricomycetes, Basidiomycota		CMPG 1789	SAGE Lucile				Wood-saprotroph		Orne, Bellême, France	ITS sequencing	ITS-BRFM 2657
2658	Coprinellus velatopruinatus	Coprinellus velatopruinatus (Bender) Redhead	Psathyrellaceae, Agaricales, Agaricomycetes, Basidiomycota		CMPG 1916	SAGE Lucile				Wood-saprotroph	paper Tappi	France	ITS sequencing	ITS-BRFM 2658
2659	Phaeolus schweinitzii	Phaeolus schweinitzii (Fr.) Pat.	Fomitopsidaceae, Polyporales, Agaricomycetes, Basidiomycota		CMPG 2050	SAGE Lucile				Plant-pathogen	on wood	Pyrénées-Atlantiques, Biarritz, France	ITS sequencing	ITS-BRFM 2659
2660	Sistotrema brinkmannii	Sistotrema brinkmannii (Bres.) J. Erikss.	Hydnaceae, Cantharellales, Agaricomycetes, Basidiomycota		CMPG 2105	SAGE Lucile				Wood-saprotroph BR	Soil	Venezuela	ITS sequencing	ITS-BRFM 2660
2661	Fomes fomentarius	Fomes fomentarius (L.) Fr.	Polyporaceae, Polyporales, Agaricomycetes, Basidiomycota			NAVARRO David	CAD 18-07	BERRIN Jean-Guy	NAVARRO David	Wood-saprotroph WR	Platanus sp., Garden of Centre de recherche de Cadarache, St Paul lez Durance	Vaucluse, Cadarache, France	ITS sequencing	ITS-BRFM 2661
2662	Verticillium sp.	Verticillium Nees	Hypocreaceae, Hypocreales, Sordariomycetes, Ascomycota			NAVARRO David	ACR 18-12	NAVARRO David	NAVARRO David	Not determined	Acrylamide gel, Laboratoire BBF, Lumlny, Marseille	Bouches du Rhone, Marseille, France	ITS sequencing	ITS-BRFM 2662
2663	Cyclocybe aegerita	Cyclocybe aegerita (V. Brig.) Vizzini	Strophariaceae, Agaricales, Agaricomycetes, Basidiomycota			NAVARRO David	LUM 18-06	NAVARRO David	NAVARRO David	Wood-saprotroph	decideous stump, Garden Tennis club, Luminy	Bouches du Rhone, Marseille, France	ITS sequencing	ITS-BRFM 2663
2665	Suillus collinitus	Suillus collinitus (Fr.) Kuntze	Suillaceae, Boletales, Agaricomycetes, Basidiomycota			NAVARRO David	LUM 18-03A	NAVARRO David	NAVARRO David	Ectomycorrhizal	under Pine, campus de Luminy	Bouches du Rhone, Marseille, France	ITS sequencing	ITS-BRFM 2665
2666	Trichaptum byssogenum	Trichaptum byssogenum (Jungh.) Ryvarden	Polyporaceae, Polyporales, Agaricomycetes, Basidiomycota		CMPG 2255	SAGE Lucile				Wood-saprotroph WR	Poutre Cumaru	Marie-Galante, Guadeloupe	ITS sequencing	ITS-BRFM 2666
2667	Stemphylium lucomagnoense	Stemphylium lucomagnoense Woudenb. & Crous	Pleosporaceae, Pleosporales, Dothideomycetes, Ascomycota		WBA-1	MECHICHI Tahar		BEN-ALI Wissal	BEN-ALI Wissal	Wood-saprotroph	sea grass, floating wood, Mediterranean sea, Sfax	Monastir, Tunisia	ITS sequencing	ITS-BRFM 2667
2668	Trichoderma sp.	Trichoderma Pers.	Hypocreaceae, Hypocreales, Sordariomycetes, Ascomycota		WBA-2	MECHICHI Tahar		BEN-ALI Wissal	BEN-ALI Wissal	Wood-saprotroph	sea grass, floating wood, Mediterranean sea, Knis Monastir	Monastir, Tunisia	ITS sequencing	ITS-BRFM 2668
2669	Trichoderma sp.	Trichoderma Pers.	Hypocreaceae, Hypocreales, Sordariomycetes, Ascomycota		WBA-3	MECHICHI Tahar		BEN-ALI Wissal	BEN-ALI Wissal	Wood-saprotroph	sea grass, floating wood, Mediterranean sea, Knis Monastir	Monastir, Tunisia	ITS sequencing	ITS-BRFM 2669
2670	Trichoderma sp.	Trichoderma Pers.	Hypocreaceae, Hypocreales, Sordariomycetes, Ascomycota		WBA-4	MECHICHI Tahar		BEN-ALI Wissal	BEN-ALI Wissal	Wood-saprotroph	sea grass, floating wood, Mediterranean sea, Knis Monastir	Monastir, Tunisia	ITS sequencing	ITS-BRFM 2670
2672	Plicaturopsis crispa	Plicaturopsis crispa (Pers.) D.A. Reid	Amylocorticiaceae, Agaricales, Agaricomycetes, Basidiomycota		CMPG 1644	SAGE Lucile				Wood-saprotroph BR	decideous wood, Freydieres Belledonne	Isère, Revel, France	ITS sequencing	ITS-BRFM 2672
2673	Heterobasidion annosum	Heterobasidion annosum (Fr.) Bref.	Bondarzewiaceae, Russulales, Agaricomycetes, Basidiomycota		CMPG 1647	SAGE Lucile				Plant-pathogen WR	on polypore CMPG 1643 (BRFM 2570), Bois Barbu Vercors	Isère, Villard-de-Lans, France	ITS sequencing	ITS-BRFM 2673
2674	Coprinopsis lagopus	Coprinopsis lagopus (Fr.) Redhead	Psathyrellaceae, Agaricales, Agaricomycetes, Basidiomycota		CMPG 1919	SAGE Lucile				Wood-saprotroph	Campus de Saint Martin d Heres, sentier botanique	Isère, Saint-Martin-d'Hères, France	ITS sequencing	ITS-BRFM 2674
2675	Agrocybe dura	Agrocybe dura (Bolton) Singer	Strophariaceae, Agaricales, Agaricomycetes, Basidiomycota		CMPG 1666	SAGE Lucile				Wood-saprotroph	lawn, Campus	Isère, Saint-Martin-d'Hères, France	ITS sequencing	ITS-BRFM 2675
2676	Agrocybe dura	Agrocybe dura (Bolton) Singer	Strophariaceae, Agaricales, Agaricomycetes, Basidiomycota		CMPG 1756	SAGE Lucile				Wood-saprotroph	lawn, Campus	Isère, Saint-Martin-d'Hères, France	ITS sequencing	ITS-BRFM 2676
2677	Porostereum spadiceum	Porostereum spadiceum (Pers.) Hjortstam & Ryvarden	Phanerochaetaceae, Polyporales, Agaricomycetes, Basidiomycota		CMPG 1837	SAGE Lucile				Wood-saprotroph	cherry tree stump	Isère, Saint-Martin-d'Uriage, France	ITS sequencing	ITS-BRFM 2677
2678	Ceriporia lacerata	Ceriporia lacerata N. Maek.	Meruliaceae, Polyporales, Agaricomycetes, Basidiomycota		CMPG 1893	SAGE Lucile				Wood-saprotroph WR	saule (Salix)	Isère, Corenc, France	ITS sequencing	ITS-BRFM 2678
2679	Phanerochaete livescens	Phanerochaete livescens (P. Karst.) Volobuev & Spirin	Phanerochaetaceae, Polyporales, Agaricomycetes, Basidiomycota		CMPG 2219	SAGE Lucile				Wood-saprotroph WR	air intake in a damp house	Calvados, Caen, France	ITS sequencing	ITS-BRFM 2679
2684	Agaricus bisporus	Agaricus bisporus (J.E. Lange) Imbach	Agaricaceae, Agaricales, Agaricomycetes, Basidiomycota		MycSA Bs 278	CALLAC Philippe			MOINARD Magalie	Litter-saprotroph	Litter, Litter of C. macrocarpa	Ile-et-Villaine, Saint-Malo, France	ITS sequencing	ITS-BRFM 2684
2688	Agaricus bisporus	Agaricus bisporus (J.E. Lange) Imbach	Agaricaceae, Agaricales, Agaricomycetes, Basidiomycota		MycSA Bs 172	CALLAC Philippe			MOINARD Magalie	Litter-saprotroph	Litter, Pinus	Morbihan, Guidel, France	ITS sequencing	ITS-BRFM 2688
2689	Agaricus bisporus	Agaricus bisporus (J.E. Lange) Imbach	Agaricaceae, Agaricales, Agaricomycetes, Basidiomycota		MycSA Bs 425E	CALLAC Philippe			MOINARD Magalie	Litter-saprotroph	Litter, Litter of C. macrocarpa	Vendée, Tharon-Plage, France	ITS sequencing	ITS-BRFM 2689
2690	Agaricus bisporus	Agaricus bisporus (J.E. Lange) Imbach	Agaricaceae, Agaricales, Agaricomycetes, Basidiomycota		MycSA Bs 426A	CALLAC Philippe			MOINARD Magalie	Litter-saprotroph	Litter, Litter of C. macrocarpa	Vendée, La Plaine-sur-Mer, France	ITS sequencing	ITS-BRFM 2690
2691	Agaricus bisporus	Agaricus bisporus (J.E. Lange) Imbach	Agaricaceae, Agaricales, Agaricomycetes, Basidiomycota		MycSA Bs 428B	CALLAC Philippe			MOINARD Magalie	Litter-saprotroph	Litter, Litter of C. macrocarpa	Vendée, Bretignolles-sur-Mer, France	ITS sequencing	ITS-BRFM 2691
2692	Agaricus bisporus	Agaricus bisporus (J.E. Lange) Imbach	Agaricaceae, Agaricales, Agaricomycetes, Basidiomycota		MycSA Bs 429A	CALLAC Philippe			MOINARD Magalie	Litter-saprotroph	Litter, Litter of C. macrocarpa	Vendée, Les Sables d'Olonne, France	ITS sequencing	ITS-BRFM 2692
2693	Agaricus bisporus	Agaricus bisporus (J.E. Lange) Imbach	Agaricaceae, Agaricales, Agaricomycetes, Basidiomycota		MycSA Bs 429B	CALLAC Philippe			MOINARD Magalie	Litter-saprotroph	Litter, Litter of C. macrocarpa	Vendée, Les Sables d'Olonne, France	ITS sequencing	ITS-BRFM 2693
2694	Agaricus bisporus	Agaricus bisporus (J.E. Lange) Imbach	Agaricaceae, Agaricales, Agaricomycetes, Basidiomycota		MycSA Bs 574	CALLAC Philippe			MOINARD Magalie	Litter-saprotroph	dung , Mont Kisavos, manure (goat or sheep)	Thessaly, Larissa, Greece	ITS sequencing	ITS-BRFM 2694
2700	Agaricus bisporus	Agaricus bisporus (J.E. Lange) Imbach	Agaricaceae, Agaricales, Agaricomycetes, Basidiomycota		MycSA Bs 551	CALLAC Philippe			MOINARD Magalie	Litter-saprotroph			ITS sequencing	ITS-BRFM 2700
2707	Agaricus bisporus	Agaricus bisporus (J.E. Lange) Imbach	Agaricaceae, Agaricales, Agaricomycetes, Basidiomycota		MycSA BS 248	CALLAC Philippe			MOINARD Magalie	Litter-saprotroph	Litter, Litter of C. macrocarpa	Côtes-d'Armor, Erquy, France	ITS sequencing	ITS-BRFM 2707
2709	Agaricus bisporus	Agaricus bisporus (J.E. Lange) Imbach	Agaricaceae, Agaricales, Agaricomycetes, Basidiomycota		MycSA BS 246	CALLAC Philippe			MOINARD Magalie	Litter-saprotroph	Litter, Litter of C. macrocarpa	Côtes-d'Armor, Erquy, France	ITS sequencing	ITS-BRFM 2709
2711	Agaricus bisporus	Agaricus bisporus (J.E. Lange) Imbach	Agaricaceae, Agaricales, Agaricomycetes, Basidiomycota		MycSA BS 176	CALLAC Philippe			MOINARD Magalie	Litter-saprotroph	Litter, Litter of C. macrocarpa	Morbihan, Guidel, France	ITS sequencing	ITS-BRFM 2711
2716	Agaricus bisporus	Agaricus bisporus (J.E. Lange) Imbach	Agaricaceae, Agaricales, Agaricomycetes, Basidiomycota		MycSA BS 184	CALLAC Philippe			MOINARD Magalie	Litter-saprotroph	Litter, Litter of C. macrocarpa	Morbihan, Ploemeur, France	ITS sequencing	ITS-BRFM 2716
2719	Agaricus bisporus	Agaricus bisporus (J.E. Lange) Imbach	Agaricaceae, Agaricales, Agaricomycetes, Basidiomycota		MycSA BS 212	CALLAC Philippe			MOINARD Magalie	Litter-saprotroph	Litter, Litter of C. macrocarpa	Morbihan, Plouharnel, France	ITS sequencing	ITS-BRFM 2719
2723	Agaricus bisporus	Agaricus bisporus (J.E. Lange) Imbach	Agaricaceae, Agaricales, Agaricomycetes, Basidiomycota		MycSA BS 191	CALLAC Philippe			MOINARD Magalie	Litter-saprotroph	Litter, Litter of C. macrocarpa	Morbihan, Plouharnel, France	ITS sequencing	ITS-BRFM 2723
2777	Agaricus bisporus	Agaricus bisporus (J.E. Lange) Imbach	Agaricaceae, Agaricales, Agaricomycetes, Basidiomycota		MycSA BS 512	CALLAC Philippe			MOINARD Magalie	Litter-saprotroph	manure, labo NAGREF, manure (mixed)	Thessaly, Larissa, Greece	ITS sequencing	ITS-BRFM 2777
2780	Myrothecium digitalicolum sp. nov.		Stachybotryaceae, Hypocreales, Sordariomycetes, Ascomycota		CLL18041	LECHAT Christian				Not determined	Litter, Rumex (oseille)	Deux-Sèvres, Villiers-en-Bois, France	ITS sequencing	ITS-BRFM 2780
2781	Dialonectriella falvoviridis sp. nov.		Nectriaceae, Hypocreales, Sordariomycetes, Ascomycota		CLLV18003	LECHAT Christian				Wood-saprotroph	Submerged wood, Parc National d la Vanoise, les Prioux, Savoie	France	ITS sequencing	ITS-BRFM 2781
2782	Clonostachys saulensis	Clonostachys saulensis Lechat & J. Fourn.	Bionectriaceae, Hypocreales, Sordariomycetes, Ascomycota		CLLG18023-A5	LECHAT Christian				Not determined	Liana, Beginning of the Big Tree Trail, Saul	Saùl, French Guiana	ITS sequencing	ITS-BRFM 2782
2783	Neocosmospora sp.	Neocosmospora E.F. Sm.	Nectriaceae, Hypocreales, Sordariomycetes, Ascomycota		CLLG18023-A8	LECHAT Christian				Not determined	Liana, Beginning of the Big Tree Trail, Saul	Saùl, French Guiana	ITS sequencing	ITS-BRFM 2783
2784	Trichothecium sp.	Trichothecium Link	Hypocreaceae, Hypocreales, Sordariomycetes, Ascomycota		CLLG18032	LECHAT Christian				Entomo-pathogen	Liana, Beginning of the Big Tree Trail, Saul	Saùl, French Guiana	ITS sequencing	ITS-BRFM 2784
2785	Pleiocarpon gardiennetii	Pleiocarpon gardiennetii Lechat & J. Fourn.	Nectriaceae, Hypocreales, Sordariomycetes, Ascomycota		CLLG18038	LECHAT Christian				Wood-saprotroph	bark, mixed to a lichen, Beginning of the Big Tree Trail, Saul	Saùl, French Guiana	ITS sequencing	ITS-BRFM 2785
2786	Neocosmospora sp.	Neocosmospora E.F. Sm.	Nectriaceae, Hypocreales, Sordariomycetes, Ascomycota		CLLG18039-B	LECHAT Christian				Not determined	Liana, Beginning of the Big Tree Trail, Saul	Saùl, French Guiana	ITS sequencing	ITS-BRFM 2786
2787	Eutypella sp.	Eutypella (Nitschke) Sacc.	Diatrypaceae, Xylariales, Sordariomycetes, Ascomycota		GYJF18001	LECHAT Christian				Wood-saprotroph	dead wood, village jardin Carbets du bord, Saul	Saùl, French Guiana	ITS sequencing	ITS-BRFM 2787
2788	Eutypa sp.	Eutypa Tul. & C. Tul.	Diatrypaceae, Xylariales, Sordariomycetes, Ascomycota		GYJF18026	LECHAT Christian				Wood-saprotroph	corticated branch, village jardin Carbets du bord, Saul	Saùl, French Guiana	ITS sequencing	ITS-BRFM 2788
2789	Hypoxylon sp.	Hypoxylon Bull.	Xylariaceae, Xylariales, Sordariomycetes, Ascomycota		GYJF18030	LECHAT Christian				Wood-saprotroph SR(II)	bark, village raccourci vers aerodrome, Saul	Saùl, French Guiana	ITS sequencing	ITS-BRFM 2789
2790	Camillea cyclisca	Camillea cyclisca (Mont.) Læssøe	Graphostromataceae, Xylariales, Sordariomycetes, Ascomycota		GYJF18051	LECHAT Christian				Wood-saprotroph	corticated branch, departure path towards Mont la Fumee, Saul	Saùl, French Guiana	ITS sequencing	ITS-BRFM 2790
2791	Hypoxylon sp.	Hypoxylon Bull.	Xylariaceae, Xylariales, Sordariomycetes, Ascomycota		GYJF18103	LECHAT Christian				Wood-saprotroph SR(II)	corticated branch, departure path towards Roche Bateau, Saul	Saùl, French Guiana	ITS sequencing	ITS-BRFM 2791
2792	Annulohypoxylon sp.	Annulohypoxylon Y.M. Ju	Xylariaceae, Xylariales, Sordariomycetes, Ascomycota		GYJF18141	LECHAT Christian				Wood-saprotroph SR(II)	blackened trunk, Beginning of the Big Tree Trail, Saul	Saùl, French Guiana	ITS sequencing	ITS-BRFM 2792
2793	Annulohypoxylon sp.	Annulohypoxylon Y.M. Ju	Xylariaceae, Xylariales, Sordariomycetes, Ascomycota		GYJF18142	LECHAT Christian				Wood-saprotroph SR(II)	blackened trunk, Beginning of the Big Tree Trail, Saul	Saùl, French Guiana	ITS sequencing	ITS-BRFM 2793
2794	Diatrype sp.	Diatrype Fr.	Diatrypaceae, Xylariales, Sordariomycetes, Ascomycota		GYJF18170	LECHAT Christian				Wood-saprotroph	corticated branch, village autour du fromager, Saul	Saùl, French Guiana	ITS sequencing	ITS-BRFM 2794
2795	Diatrype sp.	Diatrype Fr.	Diatrypaceae, Xylariales, Sordariomycetes, Ascomycota		GYJF18176	LECHAT Christian				Wood-saprotroph	corticated branch, village autour du fromager, Saul	Saùl, French Guiana	ITS sequencing	ITS-BRFM 2795
2796	Dialonectria sp.	Dialonectria (Sacc.) Cooke	Nectriaceae, Hypocreales, Sordariomycetes, Ascomycota		GYJF18001-b	LECHAT Christian				Fungi-parasitic	Eutypella sp, village jardin Carbets du bord, Saul	Saùl, French Guiana	ITS sequencing	ITS-BRFM 2796
2797	Camillea hainesii	Camillea hainesii (J.D. Rogers & Dumont) Læssøe	Graphostromataceae, Xylariales, Sordariomycetes, Ascomycota		GYJF18059	LECHAT Christian				Wood-saprotroph	corticated branch, departure path towards Mont la Fumee, Saul	Saùl, French Guiana	ITS sequencing	ITS-BRFM 2797
2798	Camillea sp.	Camillea Fr.	Graphostromataceae, Xylariales, Sordariomycetes, Ascomycota		GYJF18086	LECHAT Christian				Wood-saprotroph	corticated branch, Beginning of the Big Tree Trail, Saul	Saùl, French Guiana	ITS sequencing	ITS-BRFM 2798
2799	Clonostachys sp.	Clonostachys Corda	Bionectriaceae, Hypocreales, Sordariomycetes, Ascomycota		CLLG18038-c	LECHAT Christian				Not determined	Liana, Beginning of the Big Tree Trail, Saul	Saùl, French Guiana	ITS sequencing	ITS-BRFM 2799
2800	Hydropisphaera peziza	Hydropisphaera peziza (Tode) Dumort.	Bionectriaceae, Hypocreales, Sordariomycetes, Ascomycota		CLLG18042	LECHAT Christian				Wood-saprotroph	peeled branch, Beginning of the Big Tree Trail, Saul	Saùl, French Guiana	ITS sequencing	ITS-BRFM 2800
2801	Agaricus bisporus	Agaricus bisporus (J.E. Lange) Imbach	Agaricaceae, Agaricales, Agaricomycetes, Basidiomycota		MycSA BS 180	CALLAC Philippe			MOINARD Magalie	Litter-saprotroph	Litter of C. macrocarpa	Morbihan, Guidel, France	Species primer amplification
2802	Agaricus bisporus	Agaricus bisporus (J.E. Lange) Imbach	Agaricaceae, Agaricales, Agaricomycetes, Basidiomycota		MycSA BS 367B	CALLAC Philippe			MOINARD Magalie	Litter-saprotroph	manure, manure	Charentes, Rioux-Martin, France	Species primer amplification
2803	Agaricus bisporus	Agaricus bisporus (J.E. Lange) Imbach	Agaricaceae, Agaricales, Agaricomycetes, Basidiomycota		MycSA BS 355	CALLAC Philippe			MOINARD Magalie	Litter-saprotroph	Litter, Litter of C. macrocarpa	Morbihan, Dinard, France	Species primer amplification
2804	Agaricus bisporus	Agaricus bisporus (J.E. Lange) Imbach	Agaricaceae, Agaricales, Agaricomycetes, Basidiomycota		MycSA BS 286A	CALLAC Philippe			MOINARD Magalie	Litter-saprotroph	Litter, Litter of C. macrocarpa	Gironde, Lège-Cap-Ferret, France	Species primer amplification
2805	Agaricus bisporus	Agaricus bisporus (J.E. Lange) Imbach	Agaricaceae, Agaricales, Agaricomycetes, Basidiomycota		MycSA BS 366C	CALLAC Philippe			MOINARD Magalie	Litter-saprotroph	Litter, Litter of C. de Leyla (Cupressocyparis)	Gironde, Bordeaux, France	Species primer amplification
2806	Agaricus bisporus	Agaricus bisporus (J.E. Lange) Imbach	Agaricaceae, Agaricales, Agaricomycetes, Basidiomycota		MycSA BS 287	CALLAC Philippe			MOINARD Magalie	Litter-saprotroph	Litter, Litter of C. macrocarpa	Gironde, Lège-Cap-Ferret, France	Species primer amplification
2807	Agaricus bisporus	Agaricus bisporus (J.E. Lange) Imbach	Agaricaceae, Agaricales, Agaricomycetes, Basidiomycota		MycSA BS 363	CALLAC Philippe			MOINARD Magalie	Litter-saprotroph	Litter, Litter of C. macrocarpa	Morbihan, Dinard, France	Species primer amplification
2808	Agaricus bisporus	Agaricus bisporus (J.E. Lange) Imbach	Agaricaceae, Agaricales, Agaricomycetes, Basidiomycota		MycSA BS 359	CALLAC Philippe			MOINARD Magalie	Litter-saprotroph	Litter, Litter of C. macrocarpa	Morbihan, Dinard, France	Species primer amplification
2809	Agaricus bisporus	Agaricus bisporus (J.E. Lange) Imbach	Agaricaceae, Agaricales, Agaricomycetes, Basidiomycota		MycSA BS 433A	CALLAC Philippe			MOINARD Magalie	Litter-saprotroph	Litter, Litter of C. de Leyla (Cupressocyparis)	Charente-Maritime, La Flotte, France	Species primer amplification
2812	Agaricus bisporus	Agaricus bisporus (J.E. Lange) Imbach	Agaricaceae, Agaricales, Agaricomycetes, Basidiomycota		MycSA BS 431C	CALLAC Philippe			MOINARD Magalie	Litter-saprotroph	Litter, Litter of C. macrocarpa	Charente-Maritime, La Couarde-sur-Mer, France	Species primer amplification
2813	Agaricus bisporus	Agaricus bisporus (J.E. Lange) Imbach	Agaricaceae, Agaricales, Agaricomycetes, Basidiomycota		MycSA BS 361	CALLAC Philippe			MOINARD Magalie	Litter-saprotroph	Litter, Litter of C. macrocarpa	Morbihan, Dinard, France	Species primer amplification
2815	Agaricus bisporus	Agaricus bisporus (J.E. Lange) Imbach	Agaricaceae, Agaricales, Agaricomycetes, Basidiomycota		MycSA BS 341B	CALLAC Philippe			MOINARD Magalie	Litter-saprotroph	Litter, Litter of C. macrocarpa	Morbihan, Sarzeau, France	Species primer amplification
2816	Agaricus bisporus	Agaricus bisporus (J.E. Lange) Imbach	Agaricaceae, Agaricales, Agaricomycetes, Basidiomycota		MycSA BS 365	CALLAC Philippe			MOINARD Magalie	Litter-saprotroph	Litter, Litter of C. macrocarpa	Morbihan, Dinard, France	Species primer amplification
2817	Agaricus bisporus	Agaricus bisporus (J.E. Lange) Imbach	Agaricaceae, Agaricales, Agaricomycetes, Basidiomycota		MycSA BS 367C	CALLAC Philippe			MOINARD Magalie	Litter-saprotroph	manure, manure	Charentes, Rioux-Martin, France	Species primer amplification
2818	Agaricus bisporus	Agaricus bisporus (J.E. Lange) Imbach	Agaricaceae, Agaricales, Agaricomycetes, Basidiomycota		MycSA BS 286C	CALLAC Philippe			MOINARD Magalie	Litter-saprotroph	Litter, Litter of C. macrocarpa	Gironde, Lège-Cap-Ferret, France	Species primer amplification
2819	Agaricus bisporus	Agaricus bisporus (J.E. Lange) Imbach	Agaricaceae, Agaricales, Agaricomycetes, Basidiomycota		MycSA BS 438	CALLAC Philippe			MOINARD Magalie	Litter-saprotroph	Litter, Litter of C. macrocarpa	Charente-Maritime, Fouras, France	Species primer amplification
2820	Agaricus bisporus	Agaricus bisporus (J.E. Lange) Imbach	Agaricaceae, Agaricales, Agaricomycetes, Basidiomycota		MycSA BS 437C	CALLAC Philippe			MOINARD Magalie	Litter-saprotroph	Litter, Litter of C. macrocarpa	Charente-Maritime, Fouras, France	Species primer amplification
2821	Agaricus bisporus	Agaricus bisporus (J.E. Lange) Imbach	Agaricaceae, Agaricales, Agaricomycetes, Basidiomycota		MycSA BS 436A	CALLAC Philippe			MOINARD Magalie	Litter-saprotroph	Litter, Litter of C. macrocarpa	Charente-Maritime, Rivedoux-Plage, France	Species primer amplification
2822	Agaricus bisporus	Agaricus bisporus (J.E. Lange) Imbach	Agaricaceae, Agaricales, Agaricomycetes, Basidiomycota		MycSA BS 437A	CALLAC Philippe			MOINARD Magalie	Litter-saprotroph	Litter, Litter of C. macrocarpa	Charente-Maritime, Fouras, France	Species primer amplification
2823	Agaricus bisporus	Agaricus bisporus (J.E. Lange) Imbach	Agaricaceae, Agaricales, Agaricomycetes, Basidiomycota		MycSA BS 368	CALLAC Philippe			MOINARD Magalie	Litter-saprotroph	Litter, Litter of C. macrocarpa	Morbihan, Dinard, France	Species primer amplification
2827	Agaricus bisporus	Agaricus bisporus (J.E. Lange) Imbach	Agaricaceae, Agaricales, Agaricomycetes, Basidiomycota		MycSA BS 256	CALLAC Philippe			MOINARD Magalie	Litter-saprotroph	Litter, Litter of C. macrocarpa	Morbihan, Dinard, France	Species primer amplification
2828	Agaricus bisporus	Agaricus bisporus (J.E. Lange) Imbach	Agaricaceae, Agaricales, Agaricomycetes, Basidiomycota		MycSA BS 285	CALLAC Philippe			MOINARD Magalie	Litter-saprotroph	Litter, Litter of C. macrocarpa, Quercus	Vendée, Saint-Vincent-sur-Jard, France	Species primer amplification
2830	Agaricus bisporus	Agaricus bisporus (J.E. Lange) Imbach	Agaricaceae, Agaricales, Agaricomycetes, Basidiomycota		MycSA BS 358	CALLAC Philippe			MOINARD Magalie	Litter-saprotroph	Litter, Litter of C. macrocarpa	Morbihan, Dinard, France	Species primer amplification
2831	Agaricus bisporus	Agaricus bisporus (J.E. Lange) Imbach	Agaricaceae, Agaricales, Agaricomycetes, Basidiomycota		MycSA BS 357	CALLAC Philippe			MOINARD Magalie	Litter-saprotroph	Litter, Litter of C. macrocarpa	Morbihan, Dinard, France	Species primer amplification
2832	Agaricus bisporus	Agaricus bisporus (J.E. Lange) Imbach	Agaricaceae, Agaricales, Agaricomycetes, Basidiomycota		MycSA BS 123B	CALLAC Philippe			MOINARD Magalie	Litter-saprotroph	manure, spread manure	Saône-et-Loire, Curgy, France	Species primer amplification
2833	Agaricus bisporus	Agaricus bisporus (J.E. Lange) Imbach	Agaricaceae, Agaricales, Agaricomycetes, Basidiomycota		MycSA BS 437B	CALLAC Philippe			MOINARD Magalie	Litter-saprotroph	Litter, Litter of C. macrocarpa	Charente-Maritime, Fouras, France	Species primer amplification
2834	Agaricus bisporus	Agaricus bisporus (J.E. Lange) Imbach	Agaricaceae, Agaricales, Agaricomycetes, Basidiomycota		MycSA BS 435	CALLAC Philippe			MOINARD Magalie	Litter-saprotroph	Litter, Litter of C. macrocarpa	Charente-Maritime, Rivedoux-Plage, France	Species primer amplification
2843	Coriolopsis sp.	Coriolopsis Murrill	Polyporaceae, Polyporales, Agaricomycetes, Basidiomycota			CHADULI Delphine	FOS-18-44-A	FAVEL Anne	CHADULI Delphine	Wood-saprotroph	On painted wooden portal	Bouches du Rhone, Fos-sur-mer, France	ITS sequencing	ITS-BRFM 2843
2844	Penicillium sp.	Penicillium Link	Aspergillaceae, Eurotiales, Eurotiomycetes, Ascomycota			CHADULI Delphine	CRI-18-43	CHADULI Delphine	CHADULI Delphine	Saprotroph SR	on wood CRITT 2018-326	France	ITS sequencing	ITS-BRFM 2844
2845	Sarcopodium saulensis sp. nov.		Nectriaceae, Hypocreales, Sordariomycetes, Ascomycota		CLLG18039	LECHAT Christian		LECHAT Christian	LECHAT Christian	Not determined	Liana, Beginning of the Big Tree Trail, Saul	French Guiana	ITS sequencing	ITS-BRFM 2845
2846	Hypoxylon sp.	Hypoxylon Bull.	Xylariaceae, Xylariales, Sordariomycetes, Ascomycota		GYJF18166	LECHAT Christian				Wood-saprotroph SR(II)	standing dead trunk, village autour du fromager, Saul	French Guiana	ITS sequencing	ITS-BRFM 2846
2847	Hypoxylon duranii	Hypoxylon duranii J.D. Rogers	Xylariaceae, Xylariales, Sordariomycetes, Ascomycota		GYJF18150	LECHAT Christian				Wood-saprotroph SR(II)	corticated branch, Beginning of the Big Tree Trail, Saul	French Guiana	ITS sequencing	ITS-BRFM 2847
2848	Chaetopsina guyanensis	Chaetopsina guyanensis Lechat & J. Fourn.	Nectriaceae, Hypocreales, Sordariomycetes, Ascomycota		CLLG18038-B-2 (bis)	LECHAT Christian		LECHAT Christian	LECHAT Christian	Not determined	Liana, Beginning of the Big Tree Trail, Saul	French Guiana	ITS sequencing	ITS-BRFM 2848
2849	Ganoderma resinaceum	Ganoderma resinaceum Boud.	Ganodermataceae, Polyporales, Agaricomycetes, Basidiomycota			HAON Mireille	POM-18-14	HAON Mireille	HAON Mireille	Wood-saprotroph WR	Platanus, Résidence à La Pomme	Bouches du Rhone, Marseille, France	ITS sequencing	ITS-BRFM 2849
2850	Coriolopsis trogii	Coriolopsis trogii (Berk.) Domanski	Polyporaceae, Polyporales, Agaricomycetes, Basidiomycota			NAVARRO David	CAM-18-65	NAVARRO David	NAVARRO David	Wood-saprotroph WR	Tour du Valat - Camargue	Bouches du Rhone, Arles, France	ITS sequencing	ITS-BRFM 2850
2851	Lepista sordida	Lepista sordida (Schumach.) Singer	Tricholomataceae, Agaricales, Agaricomycetes, Basidiomycota			NAVARRO David	LUM-18-42	NAVARRO David	NAVARRO David	Litter-saprotroph	luminy	Bouches du Rhone, Marseille, France	ITS sequencing	ITS-BRFM 2851
2852	Daedaleopsis confragosa	Daedaleopsis confragosa (Bolton) J. Schröt.	Polyporaceae, Polyporales, Agaricomycetes, Basidiomycota			NAVARRO David	BEL-18-21	NAVARRO David	NAVARRO David	Wood-saprotroph WR		Orne, Bellême, France	ITS sequencing	ITS-BRFM 2852
2854	Heterobasidion sp.	Heterobasidion Bref.	Bondarzewiaceae, Russulales, Agaricomycetes, Basidiomycota			NAVARRO David	BEL-18-27	NAVARRO David	NAVARRO David	Wood-saprotroph WR		Orne, Bellême, France	ITS sequencing	ITS-BRFM 2854
2857	Lenzites warnieri	Lenzites warnieri Durieu & Mont.	Polyporaceae, Polyporales, Agaricomycetes, Basidiomycota			NAVARRO David	CAM-18-66	NAVARRO David	NAVARRO David	Wood-saprotroph WR	Tour du Valat - Camargue	Bouches du Rhone, Arles, France	ITS sequencing	ITS-BRFM 2857
2858	Fusarium sp.	Fusarium Link	Nectriaceae, Hypocreales, Sordariomycetes, Ascomycota		MUCL 56799	DECOCK Cony		DECOCK Cony	DECOCK Cony	Plant-pathogen	Leaves (Buxus sempervirens), Garden	Ile-de-France, France	ITS sequencing	ITS-BRFM 2858
2859	Phoma aliena	Phoma aliena (Fr.) Aa & Boerema	Pleosporaceae, Pleosporales, Dothideomycetes, Ascomycota		MUCL 56808	DECOCK Cony		DECOCK Cony	DECOCK Cony	Plant-pathogen	Leaves (Buxus sempervirens), Garden	Ile-de-France, France	ITS sequencing	ITS-BRFM 2859
2939	Agaricus bisporus	Agaricus bisporus (J.E. Lange) Imbach	Agaricaceae, Agaricales, Agaricomycetes, Basidiomycota		MycSA BS 622	CALLAC Philippe			MOINARD Magalie	Litter-saprotroph	Litter, Liiter of Cupressus semp.	Thessaly, Velestino, Greece	Species primer amplification
2983	Umbelopsis isabellina	Umbelopsis isabellina (Oudem.) W. Gams	Umbelopsidaceae, Umbelopsidales, Umbelopsidomycetes, Mucuromycota			NAVARRO David	CAZ19-04	CAZENAVE Robert	NAVARRO David	Not determined	branch, Quercus sp.	Tarn-et-Garonne, France	ITS sequencing	ITS-BRFM 2983
3002	Botrytis cinerea	Botrytis cinerea Pers.	Sclerotiniaceae, Helotiales, Leotiomycetes, Ascomycota	MUCL 399		LESAGE-MEESSEN Laurence				Plant-pathogen	fruit, greenhouse, Overijse	Evia, Roviés, Greece	ITS sequencing	ITS-BRFM 3002
3003	Verticillium dahliae	Verticillium dahliae Kleb.	Hypocreaceae, Hypocreales, Sordariomycetes, Ascomycota	MUCL 6963		LESAGE-MEESSEN Laurence				Plant-pathogen	seed, garden soil	Overijse, Belgium	ITS sequencing	ITS-BRFM 3003
3004	Sclerotinia sclerotiorum	Sclerotinia sclerotiorum (Lib.) de Bary	Sclerotiniaceae, Helotiales, Leotiomycetes, Ascomycota	MUCL 9083		LESAGE-MEESSEN Laurence				Plant-pathogen	seed, Seed Control Station Heverlee	Utrecht, Baarn, Netherlands	ITS sequencing	ITS-BRFM 3004
3005	Leptosphaeria maculans	Leptosphaeria maculans Ces. & De Not.	Leptosphaeriaceae, Pleosporales, Dothideomycetes, Ascomycota	MUCL 9901		LESAGE-MEESSEN Laurence				Plant-pathogen		Heverlee, Belgium	ITS sequencing	ITS-BRFM 3005
3006	Alternaria brassicae	Alternaria brassicae (Berk.) Sacc.	Pleosporaceae, Pleosporales, Dothideomycetes, Ascomycota	MUCL 38955		LESAGE-MEESSEN Laurence				Plant-pathogen	leaf, vegetable, leaf, vegetable garden	Zeeland, Veere, Netherlands	ITS sequencing	ITS-BRFM 3006
3007	Aspergillus sp	Aspergillus P. Micheli ex Haller	Aspergillaceae, Eurotiales, Eurotiomycetes, Ascomycota			CHADULI Delphine	LAB-18-28	CHADULI Delphine	CHADULI Delphine	Saprotroph SR	culture medium for characterization, Culture contaminant	Bouches du Rhone, Marseille, France	ITS sequencing	ITS-BRFM 3007
3008	Hypoxylon rubiginosum	Hypoxylon rubiginosum (Pers.) Fr.	Xylariaceae, Xylariales, Sordariomycetes, Ascomycota			NAVARRO David	BEL-18-23	NAVARRO David	NAVARRO David	Wood-saprotroph SR(II)	on basidiomycete fungi	Orne, Bellême, France	ITS sequencing	ITS-BRFM 3008
3012	Bjerkandera adusta	Bjerkandera adusta (Willd.) P. Karst.	Meruliaceae, Polyporales, Agaricomycetes, Basidiomycota			NAVARRO David	ROQ-19-01	BERRIN Jean-Guy	NAVARRO David	Wood-saprotroph WR	wood, Cupressus	Bouches du Rhone, Roquevaire, France	ITS sequencing	ITS-BRFM 3012
3015	Fomitopsis pinicola	Fomitopsis pinicola (Sw.) P. Karst.	Fomitopsidaceae, Polyporales, Agaricomycetes, Basidiomycota			NAVARRO David	ECU-19-09	NAVARRO David	NAVARRO David	Wood-saprotroph BR	Dead wood on the ground, Garden	Rhône, Ecully, France	ITS sequencing	ITS-BRFM 3015
3016	Neolentinus schaefferi	Neolentinus schaefferi (Weinm.) Redhead & Ginns	Gloeophyllaceae, Gloeophyllales, Agaricomycetes, Basidiomycota			NAVARRO David	LUM-19-07	NAVARRO David	NAVARRO David	Wood-saprotroph BR	stump, Tennis club Terrasse du phoceen	Bouches du Rhone, Marseille, France	ITS sequencing	ITS-BRFM 3016
3017	Coriolopsis sp.	Coriolopsis Murrill	Polyporaceae, Polyporales, Agaricomycetes, Basidiomycota		CMPG 2261	SAGE Lucile				Wood-saprotroph	Cumaru beam, Marie-Galante	Marie-Galante, Guadeloupe	ITS sequencing	ITS-BRFM 3017
3018	Scytalidium sp.	Scytalidium Pesante	Incertae sedis, Helotiales, Leotiomycetes, Ascomycota		CMPG 2260	SAGE Lucile				Not determined	Poutre cumaru, Marie-Galante	Marie-Galante, Guadeloupe	ITS sequencing	ITS-BRFM 3018
3026	Truncospora atlantica	Truncospora atlantica Spirin & Vlasák	Polyporaceae, Polyporales, Agaricomycetes, Basidiomycota		MUCL 57827	DECOCK Cony		DECOCK Cony	DECOCK Cony	Wood-saprotroph	dead branch attached to the tree Prunus sp., Le Yaudet, Bretagne, cotes d Armor	Côtes-d'Armor, Le Yaudet, France	ITS sequencing	ITS-BRFM 3026
3028	Hypoxylon fendleri	Hypoxylon fendleri Berk. ex Cooke	Xylariaceae, Xylariales, Sordariomycetes, Ascomycota		GYJF19021	LECHAT Christian				Wood-saprotroph SR(II)	on a dead trunk, Maripasoula, Saùl, shortcut toward airfield, disturbed secoary rainforest	Saùl, French Guiana	ITS sequencing	ITS-BRFM 3028
3031	Hypoxylon dussi	Hypoxylon dussii J. Fourn. & Lechat	Xylariaceae, Xylariales, Sordariomycetes, Ascomycota		GYJF19070	LECHAT Christian				Wood-saprotroph SR(II)	on a dead trunk, Maripasoula, Saùl, trail head toward Sentier des Gros Arbres, rainforest 210m	Saùl, French Guiana	ITS sequencing	ITS-BRFM 3031
3032	Hypoxylon atrovinosum sp. nov.		Xylariaceae, Xylariales, Sordariomycetes, Ascomycota		GYJF19098	LECHAT Christian				Wood-saprotroph SR(II)	on bark, Maripasoula, Saùl, trail head toward Mont La Fumée, rainforest 230m	Saùl, French Guiana	ITS sequencing	ITS-BRFM 3032
3033	Hypoxylon subtrugodes	Hypoxylon subtrugodes J. Fourn. & Lechat	Xylariaceae, Xylariales, Sordariomycetes, Ascomycota		GYJF19106	LECHAT Christian				Wood-saprotroph SR(II)	dead corticated branch in a pile of dead wood of Mangifera indica, Maripasoula, Saùl, village, park office	Saùl, French Guiana	ITS sequencing	ITS-BRFM 3033
3034	Annulohypoxylon sp.	Annulohypoxylon Y.M. Ju	Xylariaceae, Xylariales, Sordariomycetes, Ascomycota		GYJF19111	LECHAT Christian				Wood-saprotroph SR(II)	on dead blackened wood, Maripasoula, Saùl, shortcut toward airfield, rainforest 200m	Saùl, French Guiana	ITS sequencing	ITS-BRFM 3034
3035	Annulohypoxylon sp.	Annulohypoxylon Y.M. Ju	Xylariaceae, Xylariales, Sordariomycetes, Ascomycota		GYJF19141	LECHAT Christian				Wood-saprotroph SR(II)	on dead corticated branch, Maripasoula, Saùl, shortcut toward airfield, rainforest, 200m	Saùl, French Guiana	ITS sequencing	ITS-BRFM 3035
3036	Hypoxylon samuelsii	Hypoxylon samuelsii Y.M. Ju & J.D. Rogers	Xylariaceae, Xylariales, Sordariomycetes, Ascomycota		GYJF19147	LECHAT Christian				Wood-saprotroph SR(II)	on dead corticated branch, Maripasoula, Saùl, shortcut toward airfield, rainforest, 200m	Saùl, French Guiana	ITS sequencing	ITS-BRFM 3036
3038	Hypoxylon hypomiltum	Hypoxylon hypomiltum Mont.	Xylariaceae, Xylariales, Sordariomycetes, Ascomycota		GYJF19167	LECHAT Christian				Wood-saprotroph SR(II)	on a dead corticated trunk, disturbed secoary rainforest, ca 210m, Maripasoula, Saùl, trail head toward Sentier Gros Arbres Crique Gra Fossé	Saùl, French Guiana	ITS sequencing	ITS-BRFM 3038
3039	Hypoxylon aenepigmentum sp. nov.		Xylariaceae, Xylariales, Sordariomycetes, Ascomycota		GYJF19168	LECHAT Christian				Wood-saprotroph SR(II)	on dead corticated branch, disturbed secoary rainforest, Maripasoula, Saùl, trail head toward Sentier Gros Arbres Crique Gra Fossé	Saùl, French Guiana	ITS sequencing	ITS-BRFM 3039
3040	Hypoxylon verruciperisporium	Hypoxylon verruciperisporium J. Fourn. & Lechat	Xylariaceae, Xylariales, Sordariomycetes, Ascomycota		GYJF19211	LECHAT Christian				Wood-saprotroph SR(II)	on dead corticated branchlet, disturbed secoary rainforest ca 230m, Maripasoula, Saùl, trail head toward Roche Bateau, 3.620498	Saùl, French Guiana	ITS sequencing	ITS-BRFM 3040
3041	Hypoxylon fuscolilacinum sp. nov.		Xylariaceae, Xylariales, Sordariomycetes, Ascomycota		GYJF19219	LECHAT Christian				Wood-saprotroph SR(II)	on a dead corticated branchlet, disturbed secoary rainforest ca 230m, Maripasoula, Saùl, trail head toward Roche Bateau, airfield edge	Saùl, French Guiana	ITS sequencing	ITS-BRFM 3041
3042	Hypoxylon saulense sp. nov.		Xylariaceae, Xylariales, Sordariomycetes, Ascomycota		GYJF19222	LECHAT Christian				Wood-saprotroph SR(II)	on a dead corticated branchlet, disturbed secoary rainforest ca 230m, Maripasoula, Saùl, trail head toward Roche Bateau, airfield edge	Saùl, French Guiana	ITS sequencing	ITS-BRFM 3042
3043	Hypoxylon aenepigmentum sp. nov.		Xylariaceae, Xylariales, Sordariomycetes, Ascomycota		GYJF19229	LECHAT Christian				Wood-saprotroph SR(II)	on a dead corticated branchlet, disturbed secoary rainforest ca 230m, Maripasoula, Saùl, trail head toward Roche Bateau, airfield edge	Saùl, French Guiana	ITS sequencing	ITS-BRFM 3043
3044	Annulohypoxylon ardesiacum sp. nov.		Xylariaceae, Xylariales, Sordariomycetes, Ascomycota		GYJF19189	LECHAT Christian				Wood-saprotroph SR(II)	on a dead corticated branch, disturbed secoary rainforest ca 230m, Maripasoula, Saùl, trail head toward Roche Bateau, 3.619046	Saùl, French Guiana	ITS sequencing	ITS-BRFM 3044
3045	Hypoxylon atrovinosum sp. nov.		Xylariaceae, Xylariales, Sordariomycetes, Ascomycota		GYJF19233	LECHAT Christian				Wood-saprotroph SR(II)	on a dead corticated branchlet, disturbed secoary rainforest ca 230m, Maripasoula, Saùl, trail head toward Roche Bateau, airfield edge, 3.620754	Saùl, French Guiana	ITS sequencing	ITS-BRFM 3045
3046	Cosmospora ustulinae	Cosmospora ustulinae (Teng) C. Herrera & P. Chaverri	Nectriaceae, Hypocreales, Sordariomycetes, Ascomycota		JF19001	LECHAT Christian		FOURNIER Jacques	LECHAT Christian	Fungi-parasitic	Xylaria plymorpha, Las Muros	Ariège, Rimont, France	ITS sequencing	ITS-BRFM 3046
3047	Cosmospora ustulinae	Cosmospora ustulinae (Teng) C. Herrera & P. Chaverri	Nectriaceae, Hypocreales, Sordariomycetes, Ascomycota		CLLG19032	LECHAT Christian		LECHAT Christian	LECHAT Christian	Fungi-parasitic	Eutypella sp, Maripasoula, Saùl, trail head toward Sentier des Gros Arbres	Saùl, French Guiana	ITS sequencing	ITS-BRFM 3047
3048	Cosmospora viliuscula	Cosmospora viliuscula (Samuels	Nectriaceae, Hypocreales, Sordariomycetes, Ascomycota		CLLG19053	LECHAT Christian		LECHAT Christian	LECHAT Christian	Fungi-parasitic	Xylaria schweinitzii, Maripasoula, Saùl, trail head toward Sentier des Gros Arbres	Saùl, French Guiana	ITS sequencing	ITS-BRFM 3048
3049	Cosmospora viliuscula	Cosmospora viliuscula (Samuels	Nectriaceae, Hypocreales, Sordariomycetes, Ascomycota		CLLG19020	LECHAT Christian		LECHAT Christian	LECHAT Christian	Fungi-parasitic	Xylaria schweinitzii, Maripasoula, Saùl, trail head toward Sentier des Gros Arbres	Saùl, French Guiana	ITS sequencing	ITS-BRFM 3049
3050	Actinostilbe mammiformis	Actinostilbe mammiformis (Cif.) Seifert & Samuels	Nectriaceae, Hypocreales, Sordariomycetes, Ascomycota		CLLG19047	LECHAT Christian		LECHAT Christian	LECHAT Christian	Wood-saprotroph	on a dead corticated branchlet, Maripasoula, Saùl, trail head toward Sentier des Gros Arbres	Saùl, French Guiana	ITS sequencing	ITS-BRFM 3050
3051	Dialonectriella flavoviridis sp. nov.		Nectriaceae, Hypocreales, Sordariomycetes, Ascomycota		CLL19008	LECHAT Christian		LECHAT Christian	LECHAT Christian	Not determined	Submerged wood , La Chapelle Geneste	Haute-Loire, La Chapelle-Geneste, France	ITS sequencing	ITS-BRFM 3051
3052	Pseudocosmospora vilior	Pseudocosmospora vilior (Starbäck)C. Herrera & P.Chaverri	Nectriaceae, Hypocreales, Sordariomycetes, Ascomycota		CLLG19031	LECHAT Christian		LECHAT Christian	LECHAT Christian	Fungi-parasitic	Maripasoula, Saùl, trail head toward Sentier des Gros Arbres	Saùl, French Guiana	ITS sequencing	ITS-BRFM 3052
3053	Hydropisphaera saulensis	Hydropisphaera saulensis Lechat & J. Fourn.	Bionectriaceae, Hypocreales, Sordariomycetes, Ascomycota		CLLG19028-D	LECHAT Christian		LECHAT Christian	LECHAT Christian	Wood-saprotroph	on a dead corticated branchlet, Maripasoula, Saùl, trail head toward Sentier des Gros Arbres	Saùl, French Guiana	ITS sequencing	ITS-BRFM 3053
3054	Clonostachys sporodochialis	Clonostachys sporodochialis Schroers	Bionectriaceae, Hypocreales, Sordariomycetes, Ascomycota		CLLG19041-B	LECHAT Christian		LECHAT Christian	LECHAT Christian	Not determined	Liana, Maripasoula, Saùl, trail head toward Mont La Fumée	Saùl, French Guiana	ITS sequencing	ITS-BRFM 3054
3055	Chaetopsina pnagiana	Chaetopsina pnagiana Lechat & J. Fourn.	Nectriaceae, Hypocreales, Sordariomycetes, Ascomycota		CLLG19034	LECHAT Christian		LECHAT Christian	LECHAT Christian	Not determined	Liana, Maripasoula, Saùl, trail head toward Mont La Fumée	Saùl, French Guiana	ITS sequencing	ITS-BRFM 3055
3056	Albosynnema elegans	Albosynnema elegans E.F. Morris	Bionectriaceae, Hypocreales, Sordariomycetes, Ascomycota		CLLG19028-B	LECHAT Christian		LECHAT Christian	LECHAT Christian	Wood-saprotroph	on a dead corticated branchlet, Maripasoula, Saùl, trail head toward Sentier des Gros Arbres	Saùl, French Guiana	ITS sequencing	ITS-BRFM 3056
3057	Clonostachys pnagiana		Bionectriaceae, Hypocreales, Sordariomycetes, Ascomycota		CLLG19041	LECHAT Christian		LECHAT Christian	LECHAT Christian	Not determined	Liana, Maripasoula, Saùl, trail head toward Mont La Fumée	Saùl, French Guiana	ITS sequencing	ITS-BRFM 3057
3058	Barrmaelia sp.	Barrmaelia Rappaz	Barrmaeliaceae, Xylariales, Sordariomycetes, Ascomycota		JF19009	LECHAT Christian		FOURNIER Jacques	LECHAT Christian	Wood-saprotroph	on dead wood, La Chapelle Geneste	Haute-Loire, La Chapelle-Geneste, France	ITS sequencing	ITS-BRFM 3058
3060	Agaricus subrufescens	Agaricus subrufescens Peck	Agaricaceae, Agaricales, Agaricomycetes, Basidiomycota		CA 276b	BILLETTE Christophe			MOINARD Magalie	Litter-saprotroph	from a cultivated mushroom	Taiwan	ITS sequencing	ITS-BRFM 3060
3061	Agaricus subrufescens	Agaricus subrufescens Peck	Agaricaceae, Agaricales, Agaricomycetes, Basidiomycota		CA 454	BILLETTE Christophe			MOINARD Magalie	Litter-saprotroph	from a cultivated mushroom	Brazil	ITS sequencing	ITS-BRFM 3061
3062	Agaricus subrufescens	Agaricus subrufescens Peck	Agaricaceae, Agaricales, Agaricomycetes, Basidiomycota		CA 455	BILLETTE Christophe			MOINARD Magalie	Litter-saprotroph	from a cultivated mushroom	China	ITS sequencing	ITS-BRFM 3062
3063	Agaricus subrufescens	Agaricus subrufescens Peck	Agaricaceae, Agaricales, Agaricomycetes, Basidiomycota		CA 536	BILLETTE Christophe			MOINARD Magalie	Litter-saprotroph	On sandy soil,with Populus x canadensis and Ulmus pumila	Valle del Mezzano, Comacchio, Italy	ITS sequencing	ITS-BRFM 3063
3064	Agaricus subrufescens	Agaricus subrufescens Peck	Agaricaceae, Agaricales, Agaricomycetes, Basidiomycota		CA 560	BILLETTE Christophe			MOINARD Magalie	Litter-saprotroph	On vegetal waste in forest	Botucatu, São Paulo, Brazil	ITS sequencing	ITS-BRFM 3064
3065	Agaricus subrufescens	Agaricus subrufescens Peck	Agaricaceae, Agaricales, Agaricomycetes, Basidiomycota		CA 567-A	BILLETTE Christophe			MOINARD Magalie	Litter-saprotroph	In edge forest on vegetal waste	Bois de Bercuit, Dion de Val, Belgium	ITS sequencing	ITS-BRFM 3065
3066	Agaricus subrufescens	Agaricus subrufescens Peck	Agaricaceae, Agaricales, Agaricomycetes, Basidiomycota		CA 570	BILLETTE Christophe			MOINARD Magalie	Litter-saprotroph	from a cultivated mushroom	Brazil	ITS sequencing	ITS-BRFM 3066
3067	Agaricus subrufescens	Agaricus subrufescens Peck	Agaricaceae, Agaricales, Agaricomycetes, Basidiomycota		CA 574	BILLETTE Christophe			MOINARD Magalie	Litter-saprotroph	from a cultivated mushroom	Brazil	ITS sequencing	ITS-BRFM 3067
3068	Agaricus subrufescens	Agaricus subrufescens Peck	Agaricaceae, Agaricales, Agaricomycetes, Basidiomycota		CA 603	BILLETTE Christophe			MOINARD Magalie	Litter-saprotroph	Under Cupressus	Rancho el Tejocote, Cuapiaxtla, Mexico	ITS sequencing	ITS-BRFM 3068
3069	Agaricus subrufescens	Agaricus subrufescens Peck	Agaricaceae, Agaricales, Agaricomycetes, Basidiomycota		CA 646	BILLETTE Christophe			MOINARD Magalie	Litter-saprotroph	from a cultivated mushroom	Belgium	ITS sequencing	ITS-BRFM 3069
3070	Agaricus subrufescens	Agaricus subrufescens Peck	Agaricaceae, Agaricales, Agaricomycetes, Basidiomycota		CA 647	BILLETTE Christophe			MOINARD Magalie	Litter-saprotroph	from a cultivated mushroom	Belgium	ITS sequencing	ITS-BRFM 3070
3071	Agaricus subrufescens	Agaricus subrufescens Peck	Agaricaceae, Agaricales, Agaricomycetes, Basidiomycota		CA 438-A	BILLETTE Christophe			MOINARD Magalie	Litter-saprotroph	On soil mixed with vegetal waste of grass, ferns and Ulex europaeus	Urain, Itziar, Guipúzcoa, Spain	ITS sequencing	ITS-BRFM 3071
3072	Agaricus subrufescens	Agaricus subrufescens Peck	Agaricaceae, Agaricales, Agaricomycetes, Basidiomycota		CA 438-C	BILLETTE Christophe			MOINARD Magalie	Litter-saprotroph	On soil mixed with vegetal waste of grass, ferns and Ulex europaeus	Urain, Itziar, Guipúzcoa, Spain	ITS sequencing	ITS-BRFM 3072
3073	Agaricus subrufescens	Agaricus subrufescens Peck	Agaricaceae, Agaricales, Agaricomycetes, Basidiomycota		CA 438-D	BILLETTE Christophe			MOINARD Magalie	Litter-saprotroph	On soil mixed with vegetal waste of grass, ferns and Ulex europaeus	Urain, Itziar, Guipúzcoa, Spain	ITS sequencing	ITS-BRFM 3073
3074	Agaricus subrufescens	Agaricus subrufescens Peck	Agaricaceae, Agaricales, Agaricomycetes, Basidiomycota		CA 438-E	BILLETTE Christophe			MOINARD Magalie	Litter-saprotroph	On soil mixed with vegetal waste of grass, ferns and Ulex europaeus	Urain, Itziar, Guipúzcoa, Spain	ITS sequencing	ITS-BRFM 3074
3075	Agaricus subrufescens	Agaricus subrufescens Peck	Agaricaceae, Agaricales, Agaricomycetes, Basidiomycota		CA 487-35	BILLETTE Christophe			MOINARD Magalie	Litter-saprotroph	On vegetal waste of leaves and grass clippings	France	ITS sequencing	ITS-BRFM 3075
3076	Agaricus subrufescens	Agaricus subrufescens Peck	Agaricaceae, Agaricales, Agaricomycetes, Basidiomycota		CA 487-100	BILLETTE Christophe			MOINARD Magalie	Litter-saprotroph	On vegetal waste of leaves and grass clippings	France	ITS sequencing	ITS-BRFM 3076
3077	Agaricus subrufescens	Agaricus subrufescens Peck	Agaricaceae, Agaricales, Agaricomycetes, Basidiomycota		CA 454-3	BILLETTE Christophe			MOINARD Magalie	Litter-saprotroph	from a cultivated mushroom	Brazil	ITS sequencing	ITS-BRFM 3077
3078	Agaricus subrufescens	Agaricus subrufescens Peck	Agaricaceae, Agaricales, Agaricomycetes, Basidiomycota		CA 454-43	BILLETTE Christophe			MOINARD Magalie	Litter-saprotroph	from a cultivated mushroom	Brazil	ITS sequencing	ITS-BRFM 3078
3079	Agaricus subrufescens	Agaricus subrufescens Peck	Agaricaceae, Agaricales, Agaricomycetes, Basidiomycota		CA 438-A12	BILLETTE Christophe			MOINARD Magalie	Litter-saprotroph	On soil mixed with vegetal waste of grass, ferns and Ulex europaeus	Spain	ITS sequencing	ITS-BRFM 3079
3080	Agaricus subrufescens	Agaricus subrufescens Peck	Agaricaceae, Agaricales, Agaricomycetes, Basidiomycota		CA 438-A19	BILLETTE Christophe			MOINARD Magalie	Litter-saprotroph	On soil mixed with vegetal waste of grass, ferns and Ulex europaeus	Spain	ITS sequencing	ITS-BRFM 3080
3081	Agaricus subrufescens	Agaricus subrufescens Peck	Agaricaceae, Agaricales, Agaricomycetes, Basidiomycota		CA 438-A22xCA 276b-17	BILLETTE Christophe			MOINARD Magalie	Litter-saprotroph	hybrid strain (laboratory)		ITS sequencing	ITS-BRFM 3081
3082	Agaricus subrufescens	Agaricus subrufescens Peck	Agaricaceae, Agaricales, Agaricomycetes, Basidiomycota		CA 487-100xCA 454-3	BILLETTE Christophe			MOINARD Magalie	Litter-saprotroph	hybrid strain (laboratory)		ITS sequencing	ITS-BRFM 3082
3083	Agaricus subrufescens	Agaricus subrufescens Peck	Agaricaceae, Agaricales, Agaricomycetes, Basidiomycota		CA 487-35xCA 454-4	BILLETTE Christophe			MOINARD Magalie	Litter-saprotroph	hybrid strain (laboratory)		ITS sequencing	ITS-BRFM 3083
3085	Agaricus subrufescens	Agaricus subrufescens Peck	Agaricaceae, Agaricales, Agaricomycetes, Basidiomycota		CA 487-100xCA 454-43	BILLETTE Christophe			MOINARD Magalie	Litter-saprotroph	hybrid strain (laboratory)		ITS sequencing	ITS-BRFM 3085
3086	Agaricus subrufescens	Agaricus subrufescens Peck	Agaricaceae, Agaricales, Agaricomycetes, Basidiomycota		CA 487-100xCA 454-50	BILLETTE Christophe			MOINARD Magalie	Litter-saprotroph	hybrid strain (laboratory)		ITS sequencing	ITS-BRFM 3086
3087	Agaricus subrufescens	Agaricus subrufescens Peck	Agaricaceae, Agaricales, Agaricomycetes, Basidiomycota		CA 487-125xCA 454-3	BILLETTE Christophe			MOINARD Magalie	Litter-saprotroph	hybrid strain (laboratory)		ITS sequencing	ITS-BRFM 3087
3088	Agaricus subrufescens	Agaricus subrufescens Peck	Agaricaceae, Agaricales, Agaricomycetes, Basidiomycota		CA 487-125xCA 454-4	BILLETTE Christophe			MOINARD Magalie	Litter-saprotroph	hybrid strain (laboratory)		ITS sequencing	ITS-BRFM 3088
3089	Agaricus subrufescens	Agaricus subrufescens Peck	Agaricaceae, Agaricales, Agaricomycetes, Basidiomycota		CA 438-A12xCA 454-3	BILLETTE Christophe			MOINARD Magalie	Litter-saprotroph	hybrid strain (laboratory)		ITS sequencing	ITS-BRFM 3089
3090	Agaricus subrufescens	Agaricus subrufescens Peck	Agaricaceae, Agaricales, Agaricomycetes, Basidiomycota		CA 438-A12xCA 454-43	BILLETTE Christophe			MOINARD Magalie	Litter-saprotroph	hybrid strain (laboratory)		ITS sequencing	ITS-BRFM 3090
3091	Agaricus subrufescens	Agaricus subrufescens Peck	Agaricaceae, Agaricales, Agaricomycetes, Basidiomycota		CA 438-A12xCA 487-35	BILLETTE Christophe			MOINARD Magalie	Litter-saprotroph	hybrid strain (laboratory)		ITS sequencing	ITS-BRFM 3091
3092	Agaricus subrufescens	Agaricus subrufescens Peck	Agaricaceae, Agaricales, Agaricomycetes, Basidiomycota		CA 438-A12xCA 487-100	BILLETTE Christophe			MOINARD Magalie	Litter-saprotroph	hybrid strain (laboratory)		ITS sequencing	ITS-BRFM 3092
3093	Agaricus subrufescens	Agaricus subrufescens Peck	Agaricaceae, Agaricales, Agaricomycetes, Basidiomycota		CA 864	BILLETTE Christophe			MOINARD Magalie	Litter-saprotroph	On residues of distilled thuja	Maine-et-Loire, Saint-Lézin, France	ITS sequencing	ITS-BRFM 3093
3094	Agaricus subrufescens	Agaricus subrufescens Peck	Agaricaceae, Agaricales, Agaricomycetes, Basidiomycota		CA 900	BILLETTE Christophe			MOINARD Magalie	Litter-saprotroph	On residues of distilled thuja	Maine-et-Loire, Saint-Lézin, France	ITS sequencing	ITS-BRFM 3094
3095	Agaricus subrufescens	Agaricus subrufescens Peck	Agaricaceae, Agaricales, Agaricomycetes, Basidiomycota		CA 901	BILLETTE Christophe			MOINARD Magalie	Litter-saprotroph	On residues of distilled thuja	Maine-et-Loire, Saint-Lézin, France	ITS sequencing	ITS-BRFM 3095
3097	Agaricus subrufescens	Agaricus subrufescens Peck	Agaricaceae, Agaricales, Agaricomycetes, Basidiomycota		CA 934	BILLETTE Christophe			MOINARD Magalie	Litter-saprotroph	On grass with leaves under tree	Chiang Rai, Thailand	ITS sequencing	ITS-BRFM 3097
3106	Annulohypoxylon sp.	Annulohypoxylon Y.M. Ju	Xylariaceae, Xylariales, Sordariomycetes, Ascomycota		GYJF18037	LECHAT Christian				Wood-saprotroph SR(II)	on dead corticated branch, Saùl village, shortcut to airfield	Saùl, French Guiana	ITS sequencing	ITS-BRFM 3106
3107	Annulohypoxylon sp.	Annulohypoxylon Y.M. Ju	Xylariaceae, Xylariales, Sordariomycetes, Ascomycota		GYJF18038	LECHAT Christian				Wood-saprotroph SR(II)	on corticated branch, Saùl, village, shortcut airfield	Saùl, French Guiana	ITS sequencing	ITS-BRFM 3107
3108	Hypoxylon sp.	Hypoxylon Bull.	Xylariaceae, Xylariales, Sordariomycetes, Ascomycota		GYJF19133	LECHAT Christian				Wood-saprotroph SR(II)	on bark, Maripasoula, Saùl, trail head toward Roche Bateau, airfield edge	Saùl, French Guiana	ITS sequencing	ITS-BRFM 3108
3109	Eutypa sp.	Eutypa Tul. & C. Tul.	Diatrypaceae, Xylariales, Sordariomycetes, Ascomycota		JF19006	LECHAT Christian		FOURNIER Jacques	LECHAT Christian	Wood-saprotroph	Rhamnus alpina , Forest	Aude, Belcaire, France	ITS sequencing	ITS-BRFM 3109
3110	Hypoxylon sp.	Hypoxylon Bull.	Xylariaceae, Xylariales, Sordariomycetes, Ascomycota		GYJF19238	LECHAT Christian				Wood-saprotroph SR(II)	on bark in disturbed secoary rainforest, Saùl, trail head toward Roche Bateau, airfield edge	Saùl, French Guiana	ITS sequencing	ITS-BRFM 3110
3111	Hypoxylon sp.	Hypoxylon Bull.	Xylariaceae, Xylariales, Sordariomycetes, Ascomycota		GYJF19239	LECHAT Christian				Wood-saprotroph SR(II)	on bark in disturbed secoary rainforest (230 m), Saùl, trail head toward Roche Bateau, airfield edge	Saùl, French Guiana	ITS sequencing	ITS-BRFM 3111
3112	Hypoxylon asterostomum sp. nov.		Xylariaceae, Xylariales, Sordariomycetes, Ascomycota		GYJF19199	LECHAT Christian				Wood-saprotroph SR(II)	on a dead corticated branch, disturbed secoary rainforest (ca 230m), Maripasoula, Saùl, trail head toward Roche Bateau	Saùl, French Guiana	ITS sequencing	ITS-BRFM 3112
3113	Clonostachys pilosella		Bionectriaceae, Hypocreales, Sordariomycetes, Ascomycota		CLLG19028	LECHAT Christian		LECHAT Christian	LECHAT Christian	Wood-saprotroph	lichenized bark, Maripasoula, Saùl, trail head toward Sentier des Gros Arbres	Saùl, French Guiana	ITS sequencing	ITS-BRFM 3113
3125	Hypoxylon sp.	Hypoxylon Bull.	Xylariaceae, Xylariales, Sordariomycetes, Ascomycota		GYJF19094	LECHAT Christian				Wood-saprotroph SR(II)	on dead wood disturbed secoary rainforest, Maripasoula, Saùl, trail head toward Mont La Fumée	Saùl, French Guiana	ITS sequencing	ITS-BRFM 3125
3127	Hypoxylon sp.	Hypoxylon Bull.	Xylariaceae, Xylariales, Sordariomycetes, Ascomycota		GYJF19242	LECHAT Christian				Wood-saprotroph SR(II)	on bark, Maripasoula, Saùl, trail head toward Roche Bateau, airfield edge	Saùl, French Guiana	ITS sequencing	ITS-BRFM 3127
3128	Diatrype sp.	Diatrype Fr.	Diatrypaceae, Xylariales, Sordariomycetes, Ascomycota		GYJF19078	LECHAT Christian				Wood-saprotroph	on bark, Maripasoula, Saùl, trail head toward Sentier des Gros Arbres	Saùl, French Guiana	ITS sequencing	ITS-BRFM 3128
3129	Hypoxylon rickii	Hypoxylon rickii Y.M. Ju & J.D. Rogers	Xylariaceae, Xylariales, Sordariomycetes, Ascomycota		GYJF18079	LECHAT Christian				Wood-saprotroph SR(II)	on bark, Maripasoula, Saùl, trail head toward Sentier des Gros Arbres	Saùl, French Guiana	ITS sequencing	ITS-BRFM 3129
3130	Diatrypella sp.	Diatrypella (Ces. & De Not.) De Not.	Diatrypaceae, Xylariales, Sordariomycetes, Ascomycota		GYJF19080	LECHAT Christian				Wood-saprotroph	on bark, Maripasoula, Saùl, trail head toward Sentier des Gros Arbres	Saùl, French Guiana	ITS sequencing	ITS-BRFM 3130
3131	Eutypa sp.	Eutypa Tul. & C. Tul.	Diatrypaceae, Xylariales, Sordariomycetes, Ascomycota		GYJF19102	LECHAT Christian				Wood-saprotroph	on corticated branchlet, Maripasoula, Saùl, trail head toward Mont La Fumée	Saùl, French Guiana	ITS sequencing	ITS-BRFM 3131
3132	Diatrype sp.	Diatrype Fr.	Diatrypaceae, Xylariales, Sordariomycetes, Ascomycota		GYJF19235	LECHAT Christian				Wood-saprotroph	on corticated branchlet, Maripasoula, Saùl, trail head toward Roche Bateau	Saùl, French Guiana	ITS sequencing	ITS-BRFM 3132
